# Supplementary material for: H3K27 and H3K9 methylation mask potential CTCF binding sites to maintain 3D genome integrity
Source: HighWire-hosted journal article supplement (doi:10.1101/gr.280732.125), 2025-08-05
Supplement: Supplemental_Table_S1.xlsx [file Supplemental_Table_S1.xlsx]

## Sheet: Sheet1
Supplemental Table S1: The results of the statistical analysis for Fig. 1E
This table shows the results of t-tests comparing each sample in the "Sample" column of Fig. 1E with the WT. P-values have been adjusted for multiple testing using the Benjamini-Hochberg (BH) method.
	Student T-test, BH
	Increased Peak							Decreased Peak
	H3K9me3							H3K9me3
	class	sample	p_value	diff	p_adj			class	sample	p_value	diff	p_adj
	Consensus	Setdb1KO	0	-1.89749	0			Consensus	Setdb1KO	0	-1.89749	0
	class1	Setdb1KO	0	-4.509	0			class1	Setdb1KO	4.05385e-113	1.44666	4.86462e-113
	class2	Setdb1KO	2.65643e-24	0.557455	2.65643e-24			class2	Setdb1KO	9.77625e-221	-2.34642	1.46644e-220
	class3	Setdb1KO	1.87963e-70	-1.24359	2.25556e-70			class3	Setdb1KO	0	-2.34306	0
	class4	Setdb1KO	6.37543e-150	-1.92045	1.27509e-149			class4	Setdb1KO	3.64616e-79	-1.13959	3.64616e-79
	class5	Setdb1KO	8.8803e-123	0.815504	1.33204e-122			class5	Setdb1KO	0	-2.60465	0
	H3K9me2							H3K9me2
	class	sample	p_value	diff	p_adj			class	sample	p_value	diff	p_adj
	Consensus	TKO	4.09664e-154	-0.186716	1.22899e-153			Consensus	TKO	4.09664e-154	-0.186716	4.91597e-153
	class1	TKO	5.81555e-142	-0.581988	1.39573e-141			class1	TKO	2.59478e-76	-0.636452	1.03791e-75
	class2	TKO	1.41196e-260	-0.97325	8.47174e-260			class2	TKO	6.90157e-14	0.390925	9.20209e-14
	class3	TKO	0.776002	0.00862041	0.776002			class3	TKO	0.0315936	-0.0835257	0.0379123
	class4	TKO	1.73817e-05	-0.211053	2.08581e-05			class4	TKO	2.27173e-16	-0.268386	3.89439e-16
	class5	TKO	2.76112e-273	-0.626899	3.31335e-272			class5	TKO	3.1816e-14	-0.167908	4.7724e-14
	Consensus	Setdb1KO	1.21806e-25	-0.0735615	2.43612e-25			Consensus	Setdb1KO	1.21806e-25	-0.0735615	3.65418e-25
	class1	Setdb1KO	3.17504e-177	-0.667312	1.27002e-176			class1	Setdb1KO	5.993e-21	0.268167	1.1986e-20
	class2	Setdb1KO	6.06591e-07	-0.114337	8.08788e-07			class2	Setdb1KO	0.411846	0.0424884	0.411846
	class3	Setdb1KO	5.40587e-21	0.244395	9.26721e-21			class3	Setdb1KO	1.15287e-21	-0.376947	2.7669e-21
	class4	Setdb1KO	0.00716018	-0.138555	0.0078111			class4	Setdb1KO	0.147445	-0.0485345	0.160849
	class5	Setdb1KO	2.15728e-17	0.120787	3.23592e-17			class5	Setdb1KO	7.90291e-89	-0.451477	4.74175e-88
	H3K27me3							H3K27me3
	class	sample	p_value	diff	p_adj			class	sample	p_value	diff	p_adj
	Consensus	TKO	1.91732e-203	-0.451781	2.30079e-202			Consensus	TKO	1.91732e-203	-0.451781	2.30079e-202
	class1	TKO	1.20738e-19	-0.470396	2.06979e-19			class1	TKO	4.35928e-07	0.266318	1.30778e-06
	class2	TKO	1.29072e-139	1.08021	7.74433e-139			class2	TKO	3.81497e-12	-0.669825	1.52599e-11
	class3	TKO	0.000996981	-0.18568	0.00132931			class3	TKO	1.44631e-06	-0.4072	3.47114e-06
	class4	TKO	4.31937e-21	-0.792866	8.63875e-21			class4	TKO	0.0227721	0.149208	0.0341582
	class5	TKO	4.25421e-87	0.464634	1.27626e-86			class5	TKO	1.37595e-31	-0.546401	8.25568e-31
	Consensus	5KO	0.0409684	0.02928	0.0491621			Consensus	5KO	0.0409684	0.02928	0.0546246
	class1	5KO	0.128101	0.0769605	0.139747			class1	5KO	2.42653e-06	0.229839	4.85305e-06
	class2	5KO	1.58175e-93	0.7901	6.32701e-93			class2	5KO	0.237943	-0.111563	0.237943
	class3	5KO	0.000754116	-0.180292	0.00113117			class3	5KO	0.00575042	0.235032	0.00985786
	class4	5KO	0.411102	-0.0657363	0.411102			class4	5KO	0.0757382	0.109109	0.0826235
	class5	5KO	5.37449e-57	0.338561	1.28988e-56			class5	5KO	0.0572879	0.0893271	0.0687454
