# Supplementary material for: H3K27 and H3K9 methylation mask potential CTCF binding sites to maintain 3D genome integrity
Source: HighWire-hosted journal article supplement (doi:10.1101/gr.280732.125), 2025-08-05
Supplement: Supplemental_Table_S2.xlsx [file Supplemental_Table_S2.xlsx]

## Sheet: Sheet1
Supplementary Table S2. Raw data for Fig. 2A and Fig. S2D
Number of CTCF DE peaks in each class overlapping with each repeat type
Repeat	Total_Consensus	Overlap_Consensus	Total_class1:UP	Overlap_class1:UP	Total_class1:DOWN	Overlap_class1:DOWN	Total_class2:UP	Overlap_class2:UP	Total_class2:DOWN	Overlap_class2:DOWN	Total_class3:UP	Overlap_class3:UP	Total_class3:DOWN	Overlap_class3:DOWN	Total_class4:UP	Overlap_class4:UP	Total_class4:DOWN	Overlap_class4:DOWN	Total_class5:UP	Overlap_class5:UP	Total_class5:DOWN	Overlap_class5:DOWN
RMER17D2	57648	11	4223	0	2605	0	2654	0	1441	0	2181	0	2335	0	1588	0	3181	0	6656	2	6700	0
(TATG)n	57648	98	4223	21	2605	1	2654	12	1441	1	2181	7	2335	2	1588	2	3181	1	6656	16	6700	11
(CTGTG)n	57648	7	4223	0	2605	0	2654	0	1441	0	2181	0	2335	0	1588	0	3181	0	6656	0	6700	0
RLTR9A3A	57648	1	4223	0	2605	0	2654	0	1441	0	2181	0	2335	0	1588	0	3181	0	6656	1	6700	0
BGLII	57648	13	4223	1	2605	0	2654	0	1441	0	2181	0	2335	1	1588	0	3181	1	6656	1	6700	0
L1M3b	57648	0	4223	0	2605	0	2654	1	1441	0	2181	0	2335	0	1588	0	3181	0	6656	1	6700	0
(TTAGGG)n	57648	3	4223	0	2605	0	2654	1	1441	0	2181	0	2335	0	1588	0	3181	0	6656	0	6700	0
MamRep1161	57648	1	4223	0	2605	0	2654	0	1441	0	2181	0	2335	0	1588	0	3181	0	6656	0	6700	0
MT-int	57648	7	4223	0	2605	0	2654	0	1441	0	2181	0	2335	0	1588	0	3181	0	6656	1	6700	2
MLT1G1	57648	10	4223	0	2605	1	2654	2	1441	0	2181	1	2335	0	1588	0	3181	2	6656	0	6700	0
tRNA-Gln-CAG	57648	0	4223	0	2605	0	2654	0	1441	0	2181	0	2335	0	1588	1	3181	0	6656	0	6700	0
(TCTCTG)n	57648	33	4223	1	2605	2	2654	2	1441	1	2181	0	2335	3	1588	0	3181	4	6656	0	6700	1
MER91B	57648	18	4223	1	2605	0	2654	0	1441	0	2181	1	2335	2	1588	2	3181	2	6656	3	6700	4
Charlie21a	57648	2	4223	1	2605	0	2654	0	1441	0	2181	0	2335	0	1588	0	3181	0	6656	0	6700	0
L1MC2	57648	21	4223	3	2605	0	2654	1	1441	0	2181	1	2335	0	1588	2	3181	2	6656	2	6700	0
RMER16A2	57648	4	4223	1	2605	0	2654	0	1441	0	2181	0	2335	0	1588	0	3181	0	6656	0	6700	1
(TTTTC)n	57648	65	4223	6	2605	4	2654	3	1441	2	2181	4	2335	1	1588	0	3181	0	6656	4	6700	7
MER125	57648	1	4223	0	2605	1	2654	0	1441	0	2181	0	2335	0	1588	0	3181	0	6656	0	6700	0
(CCCCG)n	57648	49	4223	1	2605	4	2654	0	1441	4	2181	0	2335	6	1588	1	3181	29	6656	0	6700	6
(ATCTG)n	57648	0	4223	0	2605	0	2654	0	1441	0	2181	0	2335	0	1588	0	3181	1	6656	0	6700	0
ORSL-2b	57648	3	4223	0	2605	1	2654	1	1441	0	2181	0	2335	0	1588	0	3181	0	6656	0	6700	0
RLTR9A	57648	7	4223	1	2605	0	2654	0	1441	0	2181	0	2335	0	1588	0	3181	0	6656	0	6700	1
L1VL4	57648	38	4223	1	2605	3	2654	1	1441	0	2181	4	2335	0	1588	0	3181	1	6656	13	6700	1
MamTip2	57648	9	4223	0	2605	0	2654	0	1441	0	2181	0	2335	0	1588	0	3181	1	6656	1	6700	1
RLTR10D	57648	4	4223	0	2605	0	2654	0	1441	0	2181	1	2335	0	1588	0	3181	0	6656	0	6700	0
(GGA)n	57648	86	4223	5	2605	4	2654	3	1441	4	2181	2	2335	2	1588	3	3181	4	6656	7	6700	5
MLT1E3-int	57648	0	4223	0	2605	0	2654	0	1441	0	2181	0	2335	0	1588	0	3181	1	6656	0	6700	0
Eulor1	57648	0	4223	0	2605	1	2654	0	1441	0	2181	0	2335	0	1588	0	3181	0	6656	1	6700	0
RMER6D	57648	6	4223	0	2605	0	2654	0	1441	0	2181	1	2335	0	1588	0	3181	0	6656	3	6700	0
LTR16C	57648	17	4223	1	2605	2	2654	2	1441	0	2181	1	2335	1	1588	0	3181	0	6656	11	6700	1
RLTR31_Mm	57648	2	4223	0	2605	0	2654	0	1441	0	2181	0	2335	0	1588	0	3181	0	6656	0	6700	0
RLTR23	57648	14	4223	1	2605	0	2654	0	1441	1	2181	0	2335	0	1588	0	3181	2	6656	0	6700	0
(ACCTG)n	57648	0	4223	0	2605	0	2654	0	1441	0	2181	0	2335	0	1588	0	3181	1	6656	0	6700	0
(CGATA)n	57648	1	4223	0	2605	0	2654	0	1441	0	2181	0	2335	0	1588	0	3181	0	6656	0	6700	0
(CATAA)n	57648	2	4223	0	2605	0	2654	0	1441	0	2181	0	2335	0	1588	0	3181	0	6656	0	6700	0
(CGA)n	57648	3	4223	0	2605	0	2654	0	1441	0	2181	0	2335	0	1588	0	3181	0	6656	0	6700	0
RLTR41	57648	19	4223	0	2605	2	2654	3	1441	0	2181	1	2335	0	1588	0	3181	1	6656	4	6700	1
RLTR11D	57648	9	4223	1	2605	0	2654	1	1441	0	2181	0	2335	0	1588	0	3181	1	6656	0	6700	1
LTR39	57648	1	4223	0	2605	0	2654	0	1441	0	2181	0	2335	0	1588	0	3181	0	6656	0	6700	0
MTB-int	57648	9	4223	0	2605	0	2654	0	1441	0	2181	0	2335	0	1588	0	3181	0	6656	2	6700	0
Charlie1	57648	15	4223	2	2605	0	2654	0	1441	0	2181	0	2335	1	1588	0	3181	0	6656	1	6700	0
B1F2	57648	243	4223	17	2605	5	2654	3	1441	3	2181	3	2335	6	1588	2	3181	4	6656	10	6700	42
(CTCA)n	57648	3	4223	0	2605	0	2654	0	1441	1	2181	0	2335	0	1588	0	3181	0	6656	1	6700	0
L1MD3	57648	30	4223	3	2605	2	2654	1	1441	0	2181	0	2335	0	1588	0	3181	0	6656	1	6700	1
Tigger5	57648	20	4223	1	2605	1	2654	1	1441	0	2181	1	2335	0	1588	1	3181	1	6656	1	6700	2
Lx4B	57648	65	4223	3	2605	2	2654	4	1441	1	2181	5	2335	0	1588	1	3181	1	6656	10	6700	1
RLTR20A2B_MM	57648	6	4223	0	2605	0	2654	0	1441	0	2181	0	2335	1	1588	0	3181	0	6656	0	6700	0
L1MA8	57648	46	4223	4	2605	1	2654	4	1441	0	2181	2	2335	0	1588	0	3181	0	6656	7	6700	1
MER135	57648	11	4223	0	2605	0	2654	0	1441	2	2181	0	2335	0	1588	0	3181	1	6656	1	6700	2
MLT1-int	57648	0	4223	1	2605	0	2654	0	1441	0	2181	0	2335	0	1588	0	3181	0	6656	0	6700	1
RLTR13B2	57648	1	4223	0	2605	0	2654	0	1441	0	2181	0	2335	0	1588	0	3181	0	6656	2	6700	0
LTR33	57648	15	4223	0	2605	0	2654	1	1441	2	2181	1	2335	0	1588	0	3181	0	6656	5	6700	0
(CAAAC)n	57648	28	4223	2	2605	1	2654	1	1441	1	2181	2	2335	1	1588	1	3181	0	6656	3	6700	1
Charlie15a	57648	1	4223	0	2605	0	2654	0	1441	0	2181	0	2335	0	1588	0	3181	0	6656	0	6700	0
MTE2a-int	57648	4	4223	0	2605	0	2654	1	1441	0	2181	0	2335	0	1588	0	3181	0	6656	0	6700	0
MYSERV-int	57648	30	4223	0	2605	1	2654	1	1441	0	2181	0	2335	0	1588	2	3181	1	6656	2	6700	1
L1MC	57648	52	4223	13	2605	1	2654	2	1441	1	2181	6	2335	1	1588	0	3181	3	6656	5	6700	3
ERVB3_1-I_MM-int	57648	2	4223	1	2605	0	2654	0	1441	0	2181	0	2335	0	1588	0	3181	0	6656	0	6700	0
Charlie8	57648	8	4223	1	2605	1	2654	1	1441	0	2181	0	2335	0	1588	1	3181	0	6656	0	6700	1
MLT1A1	57648	86	4223	4	2605	4	2654	1	1441	0	2181	3	2335	2	1588	1	3181	3	6656	14	6700	4
RLTR13C1	57648	5	4223	1	2605	1	2654	0	1441	0	2181	0	2335	0	1588	0	3181	0	6656	5	6700	0
ID	57648	106	4223	14	2605	5	2654	3	1441	2	2181	0	2335	1	1588	4	3181	3	6656	3	6700	19
MER68C	57648	1	4223	0	2605	0	2654	0	1441	0	2181	0	2335	1	1588	0	3181	0	6656	0	6700	1
MER87	57648	0	4223	0	2605	0	2654	0	1441	0	2181	0	2335	0	1588	0	3181	0	6656	1	6700	1
(CCCGA)n	57648	2	4223	0	2605	0	2654	0	1441	0	2181	0	2335	0	1588	0	3181	0	6656	0	6700	1
MER57-int	57648	2	4223	0	2605	0	2654	0	1441	0	2181	0	2335	0	1588	0	3181	0	6656	0	6700	1
L1ME4c	57648	9	4223	0	2605	0	2654	1	1441	1	2181	0	2335	0	1588	0	3181	1	6656	2	6700	0
(TATAA)n	57648	10	4223	2	2605	0	2654	1	1441	0	2181	0	2335	0	1588	0	3181	0	6656	1	6700	0
MER46C	57648	4	4223	0	2605	1	2654	1	1441	0	2181	0	2335	0	1588	0	3181	0	6656	0	6700	0
Tigger5b	57648	18	4223	2	2605	1	2654	1	1441	0	2181	0	2335	2	1588	1	3181	3	6656	7	6700	0
Kanga2_a	57648	2	4223	0	2605	0	2654	0	1441	0	2181	0	2335	0	1588	0	3181	0	6656	1	6700	1
Eulor6C	57648	0	4223	0	2605	0	2654	0	1441	0	2181	0	2335	0	1588	0	3181	0	6656	0	6700	0
L1ME3C	57648	5	4223	0	2605	0	2654	1	1441	0	2181	0	2335	0	1588	0	3181	0	6656	1	6700	0
(GGGA)n	57648	54	4223	3	2605	4	2654	5	1441	3	2181	3	2335	2	1588	2	3181	3	6656	4	6700	8
(TCCCG)n	57648	2	4223	0	2605	0	2654	0	1441	1	2181	0	2335	0	1588	0	3181	1	6656	0	6700	0
DNA1_Mam	57648	1	4223	0	2605	0	2654	0	1441	0	2181	0	2335	0	1588	0	3181	0	6656	0	6700	0
tRNA-Ser-TCY	57648	1	4223	0	2605	0	2654	0	1441	0	2181	0	2335	0	1588	0	3181	0	6656	0	6700	0
L1M2c	57648	3	4223	0	2605	0	2654	0	1441	0	2181	0	2335	0	1588	0	3181	0	6656	1	6700	1
UCON19	57648	1	4223	0	2605	0	2654	0	1441	0	2181	0	2335	0	1588	0	3181	0	6656	0	6700	0
UCON2	57648	2	4223	0	2605	0	2654	0	1441	0	2181	0	2335	0	1588	0	3181	0	6656	0	6700	0
RLTR31C_MM	57648	8	4223	0	2605	0	2654	0	1441	0	2181	0	2335	0	1588	0	3181	0	6656	0	6700	1
L1MB8	57648	88	4223	14	2605	0	2654	3	1441	2	2181	3	2335	0	1588	0	3181	3	6656	6	6700	9
(CCGCG)n	57648	6	4223	0	2605	0	2654	0	1441	1	2181	0	2335	4	1588	0	3181	20	6656	0	6700	6
(CCCGAA)n	57648	0	4223	0	2605	0	2654	0	1441	0	2181	0	2335	0	1588	0	3181	1	6656	0	6700	0
(CGGAG)n	57648	1	4223	0	2605	0	2654	0	1441	0	2181	0	2335	0	1588	0	3181	2	6656	0	6700	0
L1MEg	57648	43	4223	7	2605	0	2654	3	1441	0	2181	1	2335	0	1588	0	3181	2	6656	6	6700	0
(TCTCCC)n	57648	12	4223	1	2605	1	2654	4	1441	0	2181	0	2335	1	1588	0	3181	0	6656	4	6700	2
(TCTTG)n	57648	1	4223	0	2605	0	2654	0	1441	0	2181	0	2335	0	1588	0	3181	0	6656	1	6700	2
RLTR12H	57648	3	4223	1	2605	0	2654	0	1441	0	2181	0	2335	0	1588	0	3181	0	6656	0	6700	0
(ACTG)n	57648	2	4223	1	2605	0	2654	0	1441	1	2181	0	2335	1	1588	0	3181	0	6656	0	6700	0
RodERV21-int	57648	30	4223	0	2605	0	2654	1	1441	1	2181	3	2335	1	1588	0	3181	0	6656	12	6700	0
BGLII_Mus	57648	3	4223	0	2605	0	2654	0	1441	0	2181	0	2335	0	1588	0	3181	0	6656	0	6700	0
(CCGAA)n	57648	1	4223	0	2605	0	2654	0	1441	0	2181	0	2335	0	1588	0	3181	0	6656	0	6700	0
RLTR20B2	57648	4	4223	2	2605	0	2654	0	1441	0	2181	0	2335	0	1588	0	3181	0	6656	0	6700	1
(CTCTG)n	57648	5	4223	0	2605	0	2654	0	1441	0	2181	0	2335	0	1588	0	3181	0	6656	0	6700	0
MER104	57648	2	4223	1	2605	0	2654	0	1441	1	2181	0	2335	0	1588	0	3181	0	6656	0	6700	1
ORR1A1-int	57648	7	4223	0	2605	0	2654	0	1441	0	2181	0	2335	0	1588	0	3181	0	6656	1	6700	0
(CCCTAA)n	57648	4	4223	0	2605	0	2654	0	1441	0	2181	2	2335	0	1588	0	3181	0	6656	0	6700	1
Lx2A	57648	14	4223	0	2605	1	2654	0	1441	0	2181	2	2335	0	1588	0	3181	0	6656	4	6700	0
MLT1E1	57648	7	4223	0	2605	0	2654	1	1441	0	2181	0	2335	0	1588	0	3181	0	6656	0	6700	0
(CCGAG)n	57648	4	4223	0	2605	0	2654	0	1441	1	2181	0	2335	0	1588	0	3181	2	6656	0	6700	0
7SK	57648	11	4223	0	2605	0	2654	1	1441	0	2181	0	2335	1	1588	0	3181	0	6656	1	6700	2
LTR85b	57648	3	4223	0	2605	0	2654	0	1441	0	2181	0	2335	0	1588	0	3181	0	6656	0	6700	1
RLTR43C	57648	8	4223	0	2605	1	2654	0	1441	0	2181	0	2335	0	1588	0	3181	0	6656	2	6700	0
LTRIS3	57648	3	4223	1	2605	0	2654	0	1441	0	2181	1	2335	0	1588	0	3181	0	6656	2	6700	0
(CCTAG)n	57648	0	4223	0	2605	0	2654	0	1441	0	2181	0	2335	0	1588	1	3181	0	6656	0	6700	0
MER92A	57648	0	4223	0	2605	0	2654	1	1441	0	2181	0	2335	0	1588	0	3181	0	6656	1	6700	0
tRNA-Leu-CTY	57648	2	4223	0	2605	0	2654	0	1441	0	2181	0	2335	1	1588	0	3181	0	6656	0	6700	0
LTR79	57648	4	4223	0	2605	1	2654	0	1441	0	2181	0	2335	0	1588	0	3181	0	6656	0	6700	0
ORR1D1-int	57648	14	4223	3	2605	0	2654	1	1441	0	2181	0	2335	0	1588	0	3181	0	6656	3	6700	0
MTEb	57648	106	4223	6	2605	1	2654	5	1441	1	2181	5	2335	0	1588	3	3181	5	6656	19	6700	6
MT2B2	57648	54	4223	6	2605	1	2654	3	1441	1	2181	0	2335	3	1588	0	3181	1	6656	0	6700	5
RLTR9E	57648	12	4223	0	2605	0	2654	0	1441	0	2181	1	2335	0	1588	0	3181	1	6656	6	6700	0
RLTR18	57648	8	4223	0	2605	0	2654	0	1441	0	2181	0	2335	0	1588	0	3181	0	6656	0	6700	1
RLTR51B_Mm	57648	8	4223	0	2605	0	2654	0	1441	0	2181	0	2335	0	1588	0	3181	0	6656	1	6700	0
MTC	57648	284	4223	18	2605	5	2654	10	1441	5	2181	13	2335	5	1588	6	3181	7	6656	28	6700	19
(TCCC)n	57648	53	4223	5	2605	0	2654	1	1441	3	2181	2	2335	6	1588	1	3181	3	6656	3	6700	5
(CTAGT)n	57648	1	4223	0	2605	0	2654	0	1441	0	2181	0	2335	0	1588	0	3181	0	6656	0	6700	0
(TCTG)n	57648	52	4223	6	2605	3	2654	3	1441	0	2181	0	2335	3	1588	2	3181	3	6656	12	6700	7
L1M5	57648	204	4223	21	2605	3	2654	8	1441	2	2181	7	2335	5	1588	2	3181	4	6656	21	6700	8
LTR37B	57648	4	4223	0	2605	0	2654	0	1441	1	2181	0	2335	0	1588	0	3181	0	6656	0	6700	0
MMERVK9E_I-int	57648	10	4223	0	2605	0	2654	1	1441	0	2181	0	2335	0	1588	0	3181	1	6656	0	6700	0
RLTR1C	57648	3	4223	1	2605	0	2654	1	1441	0	2181	0	2335	0	1588	1	3181	0	6656	1	6700	0
RLTR13D5	57648	3	4223	0	2605	0	2654	0	1441	0	2181	3	2335	0	1588	0	3181	0	6656	1	6700	0
(TAAAAA)n	57648	11	4223	2	2605	0	2654	1	1441	0	2181	0	2335	0	1588	0	3181	1	6656	1	6700	1
U5	57648	1	4223	0	2605	0	2654	1	1441	0	2181	0	2335	0	1588	1	3181	1	6656	0	6700	0
MLT1J2	57648	5	4223	2	2605	2	2654	0	1441	1	2181	4	2335	0	1588	0	3181	0	6656	0	6700	0
(TTGG)n	57648	30	4223	5	2605	1	2654	0	1441	1	2181	0	2335	0	1588	0	3181	0	6656	3	6700	0
(ATGGTG)n	57648	8	4223	0	2605	0	2654	1	1441	0	2181	0	2335	0	1588	0	3181	0	6656	0	6700	0
PB1D9	57648	529	4223	57	2605	4	2654	17	1441	6	2181	4	2335	23	1588	10	3181	9	6656	12	6700	89
L4_B_Mam	57648	5	4223	0	2605	0	2654	0	1441	0	2181	0	2335	0	1588	0	3181	0	6656	0	6700	0
Charlie16a	57648	5	4223	0	2605	0	2654	0	1441	0	2181	0	2335	0	1588	0	3181	0	6656	0	6700	0
LTR37-int	57648	0	4223	0	2605	0	2654	0	1441	0	2181	0	2335	0	1588	0	3181	1	6656	0	6700	0
MER77	57648	6	4223	2	2605	0	2654	0	1441	0	2181	0	2335	0	1588	0	3181	0	6656	1	6700	0
LTR50	57648	9	4223	2	2605	3	2654	1	1441	1	2181	6	2335	2	1588	0	3181	1	6656	4	6700	2
(CCAA)n	57648	17	4223	0	2605	1	2654	1	1441	0	2181	3	2335	0	1588	0	3181	1	6656	0	6700	2
MLTR25A	57648	24	4223	1	2605	1	2654	1	1441	1	2181	2	2335	0	1588	1	3181	0	6656	0	6700	3
RLTR34B_MM	57648	3	4223	0	2605	0	2654	0	1441	0	2181	1	2335	0	1588	0	3181	0	6656	1	6700	0
MLT1F2	57648	17	4223	0	2605	0	2654	1	1441	0	2181	0	2335	0	1588	1	3181	0	6656	1	6700	1
MER5A1	57648	41	4223	2	2605	1	2654	4	1441	0	2181	3	2335	1	1588	0	3181	3	6656	7	6700	4
MLTR13	57648	2	4223	0	2605	0	2654	0	1441	0	2181	0	2335	0	1588	0	3181	0	6656	0	6700	0
MLT1G	57648	10	4223	0	2605	2	2654	1	1441	0	2181	0	2335	1	1588	0	3181	0	6656	0	6700	0
Ricksha	57648	1	4223	1	2605	0	2654	0	1441	0	2181	0	2335	0	1588	0	3181	0	6656	0	6700	0
IAPEY_LTR	57648	2	4223	1	2605	0	2654	0	1441	0	2181	0	2335	0	1588	0	3181	0	6656	1	6700	0
(CTCCG)n	57648	2	4223	0	2605	1	2654	0	1441	0	2181	0	2335	0	1588	0	3181	0	6656	0	6700	2
(GCCTG)n	57648	0	4223	0	2605	0	2654	0	1441	0	2181	0	2335	0	1588	0	3181	0	6656	0	6700	1
L1MB3	57648	66	4223	13	2605	1	2654	3	1441	1	2181	3	2335	0	1588	0	3181	1	6656	7	6700	3
X7B_LINE	57648	1	4223	0	2605	0	2654	0	1441	0	2181	0	2335	0	1588	0	3181	0	6656	0	6700	0
MamRep137	57648	3	4223	0	2605	0	2654	0	1441	0	2181	0	2335	0	1588	0	3181	0	6656	0	6700	0
MER21-int	57648	2	4223	0	2605	0	2654	0	1441	0	2181	0	2335	0	1588	0	3181	0	6656	0	6700	0
Tigger15a	57648	4	4223	1	2605	0	2654	0	1441	0	2181	0	2335	0	1588	0	3181	0	6656	0	6700	0
MER119	57648	9	4223	0	2605	1	2654	1	1441	0	2181	0	2335	1	1588	0	3181	1	6656	0	6700	1
MLTR18D_MM	57648	12	4223	0	2605	0	2654	0	1441	0	2181	1	2335	0	1588	1	3181	0	6656	0	6700	0
RMER6B	57648	16	4223	2	2605	0	2654	0	1441	0	2181	0	2335	1	1588	0	3181	2	6656	2	6700	0
RLTR33	57648	14	4223	1	2605	0	2654	0	1441	0	2181	1	2335	0	1588	1	3181	0	6656	0	6700	3
MamRep605	57648	2	4223	0	2605	0	2654	0	1441	0	2181	1	2335	0	1588	0	3181	0	6656	0	6700	0
RLTR5_Mm	57648	2	4223	1	2605	0	2654	0	1441	0	2181	1	2335	0	1588	0	3181	0	6656	1	6700	0
MLTR31FA_MM	57648	3	4223	0	2605	0	2654	0	1441	0	2181	0	2335	0	1588	0	3181	0	6656	1	6700	1
UCON28a	57648	1	4223	0	2605	0	2654	0	1441	0	2181	0	2335	0	1588	0	3181	1	6656	0	6700	0
RLTR41A2	57648	8	4223	0	2605	0	2654	0	1441	1	2181	2	2335	0	1588	0	3181	1	6656	1	6700	0
Tigger18a	57648	2	4223	2	2605	0	2654	0	1441	0	2181	0	2335	0	1588	0	3181	1	6656	0	6700	0
T-rich	57648	292	4223	22	2605	16	2654	13	1441	1	2181	7	2335	5	1588	7	3181	5	6656	33	6700	26
L1MEg1	57648	0	4223	0	2605	0	2654	1	1441	1	2181	0	2335	0	1588	0	3181	0	6656	1	6700	0
Charlie17	57648	2	4223	0	2605	0	2654	0	1441	0	2181	0	2335	0	1588	0	3181	0	6656	0	6700	1
RLTR10D2	57648	6	4223	0	2605	0	2654	1	1441	0	2181	2	2335	0	1588	0	3181	1	6656	2	6700	0
(TCG)n	57648	1	4223	0	2605	0	2654	0	1441	0	2181	0	2335	0	1588	0	3181	2	6656	0	6700	0
U17	57648	1	4223	0	2605	0	2654	0	1441	0	2181	0	2335	0	1588	0	3181	0	6656	0	6700	0
Charlie23a	57648	1	4223	0	2605	0	2654	0	1441	0	2181	1	2335	0	1588	0	3181	0	6656	0	6700	0
ORR1A3-int	57648	14	4223	0	2605	0	2654	0	1441	0	2181	0	2335	0	1588	0	3181	0	6656	2	6700	0
PB1D7	57648	347	4223	54	2605	13	2654	12	1441	5	2181	7	2335	8	1588	9	3181	9	6656	18	6700	56
(TTTA)n	57648	605	4223	20	2605	6	2654	16	1441	8	2181	8	2335	7	1588	5	3181	4	6656	38	6700	46
(TCCA)n	57648	32	4223	2	2605	1	2654	2	1441	0	2181	0	2335	0	1588	0	3181	2	6656	5	6700	2
tRNA-Lys-AAG	57648	0	4223	0	2605	0	2654	0	1441	0	2181	0	2335	0	1588	0	3181	0	6656	0	6700	0
X6B_LINE	57648	0	4223	0	2605	1	2654	0	1441	0	2181	0	2335	0	1588	0	3181	0	6656	0	6700	0
(CAAGA)n	57648	1	4223	0	2605	0	2654	0	1441	0	2181	0	2335	0	1588	0	3181	0	6656	0	6700	0
L1ME3A	57648	27	4223	4	2605	2	2654	1	1441	0	2181	1	2335	0	1588	1	3181	1	6656	0	6700	1
MLT1H2	57648	8	4223	1	2605	0	2654	0	1441	0	2181	1	2335	0	1588	0	3181	1	6656	1	6700	0
L1MC4	57648	79	4223	4	2605	0	2654	4	1441	1	2181	3	2335	0	1588	4	3181	1	6656	6	6700	6
L1Md_T	57648	103	4223	5	2605	6	2654	7	1441	2	2181	8	2335	0	1588	3	3181	1	6656	39	6700	5
L1MDa	57648	37	4223	1	2605	2	2654	3	1441	1	2181	1	2335	0	1588	0	3181	0	6656	6	6700	5
RMER15	57648	169	4223	10	2605	7	2654	7	1441	1	2181	14	2335	3	1588	1	3181	3	6656	21	6700	15
MTEb-int	57648	9	4223	1	2605	0	2654	1	1441	0	2181	2	2335	0	1588	0	3181	0	6656	0	6700	0
RMER17B	57648	29	4223	0	2605	2	2654	0	1441	0	2181	3	2335	0	1588	0	3181	1	6656	14	6700	0
(GCTTG)n	57648	1	4223	0	2605	0	2654	0	1441	0	2181	0	2335	0	1588	1	3181	0	6656	0	6700	0
Charlie29a	57648	3	4223	0	2605	0	2654	0	1441	0	2181	0	2335	0	1588	0	3181	0	6656	0	6700	0
LTR105_Mam	57648	1	4223	0	2605	0	2654	1	1441	0	2181	0	2335	0	1588	0	3181	0	6656	0	6700	0
(TTTAA)n	57648	5	4223	1	2605	0	2654	0	1441	0	2181	1	2335	0	1588	0	3181	0	6656	0	6700	0
RLTR4_Mm	57648	1	4223	0	2605	0	2654	0	1441	0	2181	0	2335	0	1588	1	3181	0	6656	0	6700	0
BGLII_C	57648	0	4223	1	2605	0	2654	0	1441	0	2181	0	2335	0	1588	0	3181	0	6656	1	6700	0
RLTR12A	57648	12	4223	1	2605	0	2654	0	1441	1	2181	0	2335	0	1588	0	3181	0	6656	0	6700	0
B3A	57648	3386	4223	1156	2605	59	2654	533	1441	27	2181	286	2335	59	1588	26	3181	162	6656	502	6700	271
RLTR24	57648	16	4223	2	2605	0	2654	0	1441	0	2181	1	2335	1	1588	0	3181	0	6656	1	6700	2
MLT1G1-int	57648	1	4223	0	2605	0	2654	0	1441	0	2181	0	2335	0	1588	0	3181	0	6656	0	6700	0
MER77B	57648	3	4223	0	2605	0	2654	1	1441	0	2181	1	2335	0	1588	0	3181	1	6656	2	6700	0
MER34A1	57648	3	4223	0	2605	0	2654	0	1441	1	2181	1	2335	0	1588	0	3181	0	6656	1	6700	1
MER89	57648	3	4223	0	2605	1	2654	0	1441	0	2181	0	2335	0	1588	0	3181	0	6656	0	6700	0
IAPLTR3-int	57648	5	4223	0	2605	1	2654	0	1441	0	2181	4	2335	0	1588	0	3181	0	6656	5	6700	0
LTR40b	57648	4	4223	0	2605	1	2654	0	1441	0	2181	0	2335	0	1588	0	3181	0	6656	0	6700	0
(CGTG)n	57648	17	4223	2	2605	0	2654	1	1441	0	2181	0	2335	2	1588	0	3181	2	6656	1	6700	3
ERVB7_4-LTR_MM	57648	3	4223	0	2605	0	2654	0	1441	0	2181	0	2335	0	1588	0	3181	0	6656	0	6700	0
MLT1L	57648	16	4223	1	2605	0	2654	0	1441	0	2181	1	2335	1	1588	1	3181	0	6656	1	6700	1
PB1D11	57648	222	4223	19	2605	4	2654	10	1441	3	2181	10	2335	6	1588	7	3181	4	6656	15	6700	32
L1M7	57648	2	4223	0	2605	0	2654	1	1441	0	2181	2	2335	0	1588	0	3181	0	6656	0	6700	0
(TTAAA)n	57648	2	4223	0	2605	0	2654	0	1441	0	2181	0	2335	0	1588	0	3181	0	6656	0	6700	0
RLTR9C	57648	2	4223	0	2605	0	2654	0	1441	0	2181	0	2335	0	1588	0	3181	0	6656	0	6700	0
MYSERV6-int	57648	65	4223	3	2605	1	2654	1	1441	0	2181	1	2335	0	1588	2	3181	3	6656	10	6700	5
MER91C	57648	5	4223	0	2605	0	2654	0	1441	0	2181	0	2335	0	1588	0	3181	0	6656	4	6700	0
B3	57648	6025	4223	1998	2605	101	2654	792	1441	59	2181	425	2335	124	1588	73	3181	200	6656	718	6700	568
MLTR31D_MM	57648	3	4223	1	2605	0	2654	1	1441	0	2181	0	2335	0	1588	0	3181	0	6656	0	6700	0
(TTA)n	57648	74	4223	11	2605	6	2654	8	1441	2	2181	6	2335	0	1588	1	3181	5	6656	14	6700	1
(CATG)n	57648	7	4223	3	2605	0	2654	2	1441	0	2181	1	2335	0	1588	0	3181	2	6656	0	6700	1
MLTR11B	57648	34	4223	4	2605	0	2654	0	1441	0	2181	3	2335	0	1588	1	3181	0	6656	6	6700	4
4.5SRNA	57648	36	4223	3	2605	0	2654	0	1441	0	2181	1	2335	0	1588	0	3181	1	6656	3	6700	3
(CCCCCT)n	57648	11	4223	0	2605	1	2654	1	1441	0	2181	0	2335	0	1588	2	3181	0	6656	0	6700	1
MER20	57648	139	4223	2	2605	12	2654	4	1441	6	2181	5	2335	9	1588	9	3181	6	6656	28	6700	10
RLTR13D3A	57648	31	4223	0	2605	0	2654	0	1441	0	2181	1	2335	0	1588	0	3181	0	6656	4	6700	0
RLTR10E	57648	1	4223	0	2605	0	2654	0	1441	0	2181	0	2335	0	1588	0	3181	0	6656	0	6700	0
ETnERV3-int	57648	1	4223	0	2605	0	2654	0	1441	0	2181	0	2335	0	1588	0	3181	0	6656	0	6700	0
MER70-int	57648	1	4223	0	2605	0	2654	0	1441	0	2181	0	2335	0	1588	0	3181	0	6656	0	6700	0
(AGGTG)n	57648	1	4223	0	2605	0	2654	0	1441	0	2181	0	2335	0	1588	0	3181	0	6656	0	6700	0
Charlie26a	57648	1	4223	0	2605	0	2654	0	1441	0	2181	0	2335	0	1588	0	3181	0	6656	0	6700	0
L1M3c	57648	1	4223	0	2605	0	2654	0	1441	1	2181	0	2335	0	1588	0	3181	0	6656	1	6700	0
LTR72_RN	57648	10	4223	0	2605	0	2654	0	1441	0	2181	0	2335	0	1588	0	3181	0	6656	2	6700	1
MER67C	57648	5	4223	0	2605	0	2654	0	1441	0	2181	0	2335	0	1588	0	3181	0	6656	0	6700	0
MMERVK10C-int	57648	22	4223	2	2605	0	2654	1	1441	0	2181	0	2335	0	1588	0	3181	1	6656	7	6700	0
MER96B	57648	6	4223	0	2605	1	2654	2	1441	0	2181	0	2335	1	1588	0	3181	0	6656	0	6700	1
CT-rich	57648	220	4223	20	2605	13	2654	11	1441	6	2181	5	2335	7	1588	6	3181	15	6656	25	6700	21
(GCTG)n	57648	0	4223	1	2605	0	2654	0	1441	0	2181	0	2335	0	1588	0	3181	0	6656	0	6700	1
ORR1C2	57648	108	4223	3	2605	2	2654	4	1441	0	2181	6	2335	2	1588	1	3181	0	6656	9	6700	5
RMER19B2	57648	34	4223	2	2605	1	2654	2	1441	0	2181	0	2335	0	1588	0	3181	0	6656	5	6700	2
(TAAAA)n	57648	58	4223	5	2605	3	2654	1	1441	1	2181	3	2335	3	1588	0	3181	0	6656	7	6700	4
UCON10	57648	1	4223	0	2605	0	2654	0	1441	0	2181	0	2335	0	1588	0	3181	0	6656	0	6700	0
Tigger9a	57648	2	4223	0	2605	0	2654	1	1441	0	2181	0	2335	0	1588	0	3181	0	6656	0	6700	0
L1M2a	57648	4	4223	1	2605	0	2654	0	1441	0	2181	1	2335	0	1588	0	3181	0	6656	1	6700	0
BGLII_A	57648	2	4223	0	2605	0	2654	0	1441	0	2181	0	2335	0	1588	0	3181	0	6656	0	6700	0
(ATTG)n	57648	37	4223	0	2605	1	2654	1	1441	0	2181	0	2335	0	1588	1	3181	0	6656	2	6700	2
(CCTG)n	57648	21	4223	1	2605	0	2654	1	1441	0	2181	1	2335	1	1588	1	3181	1	6656	1	6700	2
MER58A	57648	33	4223	3	2605	3	2654	4	1441	1	2181	1	2335	1	1588	0	3181	0	6656	5	6700	3
(CAGCG)n	57648	2	4223	0	2605	0	2654	0	1441	0	2181	0	2335	0	1588	0	3181	0	6656	0	6700	0
MER68-int	57648	1	4223	0	2605	0	2654	0	1441	0	2181	0	2335	0	1588	0	3181	0	6656	0	6700	0
RLTR26_Mus	57648	11	4223	0	2605	0	2654	0	1441	0	2181	1	2335	0	1588	0	3181	1	6656	3	6700	0
RLTR28B	57648	7	4223	2	2605	0	2654	1	1441	0	2181	0	2335	0	1588	1	3181	0	6656	2	6700	0
L1_Mus4	57648	54	4223	3	2605	6	2654	5	1441	0	2181	9	2335	1	1588	1	3181	3	6656	27	6700	3
LTR67B	57648	8	4223	0	2605	1	2654	0	1441	1	2181	0	2335	0	1588	0	3181	0	6656	0	6700	0
LTR16A	57648	13	4223	0	2605	2	2654	0	1441	1	2181	2	2335	0	1588	0	3181	1	6656	3	6700	1
L2b	57648	148	4223	7	2605	10	2654	4	1441	3	2181	9	2335	8	1588	1	3181	3	6656	16	6700	23
X7C_LINE	57648	2	4223	0	2605	0	2654	0	1441	0	2181	0	2335	0	1588	0	3181	0	6656	0	6700	1
(CA)n	57648	1207	4223	160	2605	52	2654	81	1441	10	2181	59	2335	30	1588	33	3181	44	6656	149	6700	115
L1MA4A	57648	21	4223	2	2605	0	2654	2	1441	2	2181	2	2335	1	1588	0	3181	0	6656	4	6700	0
(CCCCAG)n	57648	9	4223	0	2605	1	2654	1	1441	0	2181	1	2335	3	1588	0	3181	1	6656	0	6700	4
LTR16D2	57648	1	4223	0	2605	0	2654	0	1441	0	2181	0	2335	0	1588	0	3181	0	6656	1	6700	0
IAPEY3_LTR	57648	1	4223	0	2605	0	2654	1	1441	0	2181	0	2335	0	1588	0	3181	0	6656	0	6700	0
(CCCCCG)n	57648	6	4223	0	2605	0	2654	0	1441	0	2181	0	2335	2	1588	0	3181	3	6656	0	6700	1
MER3	57648	23	4223	2	2605	2	2654	1	1441	1	2181	2	2335	1	1588	0	3181	2	6656	3	6700	5
Charlie17a	57648	2	4223	1	2605	0	2654	0	1441	0	2181	0	2335	0	1588	0	3181	0	6656	0	6700	0
MER102c	57648	6	4223	0	2605	1	2654	1	1441	0	2181	1	2335	0	1588	0	3181	0	6656	1	6700	1
RMER19C	57648	23	4223	1	2605	0	2654	0	1441	1	2181	2	2335	0	1588	0	3181	0	6656	9	6700	1
(AAGTG)n	57648	0	4223	0	2605	0	2654	0	1441	0	2181	0	2335	0	1588	0	3181	0	6656	0	6700	0
B1_Mus1	57648	1671	4223	190	2605	16	2654	45	1441	35	2181	40	2335	36	1588	23	3181	27	6656	67	6700	227
MLTR73	57648	10	4223	4	2605	0	2654	0	1441	0	2181	0	2335	0	1588	0	3181	0	6656	1	6700	0
RMER17D	57648	7	4223	0	2605	0	2654	0	1441	0	2181	0	2335	1	1588	0	3181	0	6656	0	6700	1
(GA)n	57648	392	4223	38	2605	14	2654	31	1441	8	2181	14	2335	19	1588	2	3181	22	6656	53	6700	36
MER66C	57648	0	4223	0	2605	0	2654	0	1441	0	2181	1	2335	0	1588	0	3181	0	6656	1	6700	0
RLTR13A	57648	3	4223	0	2605	0	2654	0	1441	0	2181	0	2335	0	1588	0	3181	0	6656	0	6700	0
MuRRS-int	57648	20	4223	0	2605	0	2654	0	1441	0	2181	6	2335	0	1588	0	3181	1	6656	6	6700	1
PB1	57648	180	4223	18	2605	4	2654	6	1441	6	2181	7	2335	5	1588	2	3181	5	6656	6	6700	21
MER45B	57648	7	4223	0	2605	1	2654	0	1441	0	2181	2	2335	0	1588	0	3181	1	6656	3	6700	1
ERVB4_1-I_MM-int	57648	8	4223	0	2605	0	2654	1	1441	0	2181	2	2335	0	1588	0	3181	0	6656	4	6700	1
(CCCGG)n	57648	3	4223	0	2605	0	2654	0	1441	0	2181	0	2335	3	1588	0	3181	2	6656	0	6700	1
L1MEc	57648	48	4223	4	2605	0	2654	4	1441	1	2181	3	2335	0	1588	1	3181	1	6656	5	6700	3
MLTR18A_MM	57648	4	4223	0	2605	0	2654	0	1441	0	2181	0	2335	0	1588	0	3181	0	6656	0	6700	0
MER44C	57648	7	4223	0	2605	0	2654	0	1441	0	2181	0	2335	0	1588	0	3181	0	6656	0	6700	1
L1MEi	57648	7	4223	0	2605	1	2654	0	1441	1	2181	0	2335	0	1588	0	3181	0	6656	0	6700	0
MusHAL1	57648	21	4223	0	2605	3	2654	1	1441	0	2181	0	2335	1	1588	0	3181	1	6656	6	6700	1
LTR33A	57648	8	4223	1	2605	0	2654	0	1441	0	2181	0	2335	0	1588	0	3181	1	6656	0	6700	0
(CAGAG)n	57648	4	4223	0	2605	0	2654	0	1441	0	2181	0	2335	0	1588	0	3181	0	6656	0	6700	0
MER34A	57648	8	4223	1	2605	0	2654	0	1441	0	2181	1	2335	0	1588	0	3181	0	6656	1	6700	0
Lx5	57648	160	4223	2	2605	8	2654	3	1441	1	2181	8	2335	2	1588	3	3181	5	6656	27	6700	6
CR1_Mam	57648	1	4223	0	2605	0	2654	0	1441	0	2181	0	2335	0	1588	0	3181	0	6656	0	6700	0
MLT1J	57648	36	4223	3	2605	3	2654	1	1441	1	2181	1	2335	0	1588	0	3181	2	6656	4	6700	4
AmnSINE2	57648	3	4223	0	2605	0	2654	0	1441	0	2181	0	2335	0	1588	0	3181	0	6656	0	6700	0
MLTR31F_MM	57648	5	4223	0	2605	1	2654	1	1441	0	2181	0	2335	0	1588	0	3181	0	6656	1	6700	0
MER45A	57648	9	4223	1	2605	1	2654	1	1441	0	2181	0	2335	0	1588	0	3181	2	6656	2	6700	0
MER63A	57648	6	4223	0	2605	0	2654	1	1441	0	2181	0	2335	0	1588	0	3181	0	6656	2	6700	0
MER94	57648	4	4223	0	2605	0	2654	1	1441	0	2181	0	2335	0	1588	0	3181	0	6656	2	6700	1
(TTTG)n	57648	296	4223	30	2605	11	2654	22	1441	7	2181	10	2335	8	1588	11	3181	6	6656	32	6700	36
LTR48	57648	7	4223	0	2605	0	2654	0	1441	0	2181	0	2335	0	1588	0	3181	0	6656	1	6700	0
Lx2	57648	91	4223	3	2605	13	2654	4	1441	0	2181	6	2335	0	1588	3	3181	2	6656	22	6700	3
Tigger6a	57648	3	4223	0	2605	0	2654	0	1441	0	2181	0	2335	0	1588	0	3181	0	6656	0	6700	1
Tigger7	57648	66	4223	5	2605	1	2654	3	1441	0	2181	3	2335	0	1588	0	3181	3	6656	8	6700	5
L1_Mm	57648	23	4223	0	2605	2	2654	2	1441	0	2181	2	2335	0	1588	1	3181	1	6656	10	6700	2
5S	57648	5	4223	1	2605	0	2654	0	1441	0	2181	0	2335	0	1588	0	3181	0	6656	0	6700	1
(CCGGA)n	57648	0	4223	0	2605	0	2654	0	1441	0	2181	0	2335	0	1588	0	3181	1	6656	0	6700	0
tRNA-Val-GTA	57648	0	4223	0	2605	0	2654	0	1441	0	2181	0	2335	0	1588	0	3181	0	6656	0	6700	0
RLTR48B	57648	3	4223	0	2605	0	2654	0	1441	0	2181	0	2335	0	1588	0	3181	0	6656	0	6700	0
MER92C	57648	1	4223	0	2605	0	2654	0	1441	0	2181	0	2335	0	1588	0	3181	0	6656	0	6700	0
RLTR30D2_MM	57648	10	4223	0	2605	0	2654	0	1441	0	2181	0	2335	0	1588	0	3181	0	6656	1	6700	0
MamGypLTR1c	57648	1	4223	0	2605	0	2654	0	1441	0	2181	0	2335	0	1588	0	3181	0	6656	1	6700	0
RLTR19B	57648	4	4223	0	2605	0	2654	0	1441	0	2181	0	2335	0	1588	0	3181	0	6656	1	6700	0
MER97c	57648	1	4223	0	2605	0	2654	0	1441	0	2181	0	2335	0	1588	0	3181	0	6656	0	6700	1
LTR41B	57648	24	4223	0	2605	4	2654	2	1441	3	2181	3	2335	2	1588	2	3181	0	6656	3	6700	2
RLTR46A2	57648	9	4223	1	2605	6	2654	1	1441	0	2181	3	2335	0	1588	0	3181	2	6656	4	6700	0
IAPEY4_LTR	57648	13	4223	6	2605	4	2654	5	1441	0	2181	0	2335	1	1588	1	3181	5	6656	0	6700	3
Tigger16a	57648	6	4223	3	2605	0	2654	0	1441	0	2181	0	2335	0	1588	1	3181	3	6656	0	6700	0
(CTTG)n	57648	11	4223	3	2605	1	2654	1	1441	0	2181	0	2335	1	1588	0	3181	1	6656	1	6700	1
Cheshire	57648	12	4223	2	2605	0	2654	1	1441	1	2181	1	2335	1	1588	0	3181	0	6656	3	6700	1
U7	57648	1	4223	0	2605	0	2654	0	1441	0	2181	0	2335	0	1588	0	3181	0	6656	0	6700	0
LTR16A1	57648	2	4223	0	2605	0	2654	0	1441	0	2181	1	2335	0	1588	0	3181	2	6656	2	6700	0
MER70B	57648	1	4223	0	2605	0	2654	0	1441	0	2181	0	2335	0	1588	0	3181	1	6656	1	6700	0
LTR88c	57648	1	4223	1	2605	0	2654	0	1441	0	2181	0	2335	0	1588	0	3181	1	6656	1	6700	0
Eulor2B	57648	1	4223	0	2605	0	2654	0	1441	0	2181	0	2335	0	1588	0	3181	0	6656	0	6700	0
LTR16E2	57648	4	4223	0	2605	1	2654	0	1441	0	2181	0	2335	0	1588	0	3181	0	6656	1	6700	0
RMER16B	57648	2	4223	0	2605	0	2654	0	1441	0	2181	1	2335	0	1588	0	3181	0	6656	0	6700	1
RLTR22_Mus	57648	4	4223	0	2605	0	2654	0	1441	0	2181	0	2335	0	1588	0	3181	0	6656	0	6700	0
LTR33C	57648	3	4223	0	2605	0	2654	0	1441	0	2181	0	2335	0	1588	0	3181	0	6656	0	6700	0
ERVB4_3-I_MM-int	57648	3	4223	0	2605	0	2654	2	1441	0	2181	1	2335	0	1588	1	3181	1	6656	2	6700	0
ERVB4_2-I_MM-int	57648	2	4223	0	2605	0	2654	0	1441	0	2181	0	2335	0	1588	0	3181	0	6656	0	6700	0
L1ME5	57648	1	4223	0	2605	0	2654	1	1441	0	2181	0	2335	0	1588	0	3181	0	6656	0	6700	0
RLTR17	57648	20	4223	0	2605	1	2654	0	1441	0	2181	0	2335	1	1588	0	3181	0	6656	3	6700	0
RLTR11B	57648	13	4223	0	2605	0	2654	0	1441	0	2181	0	2335	0	1588	0	3181	0	6656	3	6700	1
MER74C	57648	3	4223	0	2605	0	2654	0	1441	0	2181	0	2335	0	1588	0	3181	0	6656	0	6700	0
(CATTA)n	57648	0	4223	0	2605	0	2654	0	1441	0	2181	0	2335	0	1588	0	3181	0	6656	0	6700	0
MLT1E	57648	4	4223	0	2605	0	2654	0	1441	0	2181	0	2335	0	1588	0	3181	0	6656	1	6700	0
.	57648	15007	4223	282	2605	1312	2654	508	1441	711	2181	427	2335	1229	1588	797	3181	1236	6656	1647	6700	2464
IAPLTR2a	57648	40	4223	2	2605	0	2654	1	1441	0	2181	4	2335	0	1588	0	3181	0	6656	16	6700	0
RLTR51A_Mm	57648	24	4223	3	2605	1	2654	0	1441	0	2181	2	2335	0	1588	0	3181	1	6656	2	6700	3
(CATCG)n	57648	1	4223	0	2605	0	2654	0	1441	0	2181	0	2335	0	1588	0	3181	0	6656	0	6700	0
MamSINE1	57648	1	4223	0	2605	0	2654	2	1441	0	2181	1	2335	0	1588	0	3181	2	6656	0	6700	1
ERVB7_3-LTR_MM	57648	3	4223	0	2605	0	2654	1	1441	0	2181	0	2335	0	1588	0	3181	0	6656	0	6700	0
(ATATG)n	57648	2	4223	0	2605	0	2654	0	1441	0	2181	0	2335	0	1588	0	3181	0	6656	0	6700	0
ORR1F-int	57648	2	4223	0	2605	0	2654	0	1441	0	2181	0	2335	0	1588	0	3181	0	6656	1	6700	0
RMER30	57648	33	4223	3	2605	0	2654	6	1441	0	2181	0	2335	1	1588	0	3181	0	6656	4	6700	7
Tigger12c	57648	4	4223	0	2605	0	2654	0	1441	0	2181	0	2335	0	1588	0	3181	0	6656	1	6700	0
LTRIS4	57648	3	4223	0	2605	0	2654	0	1441	0	2181	0	2335	0	1588	0	3181	0	6656	0	6700	0
RLTR34C_MM	57648	7	4223	0	2605	0	2654	0	1441	0	2181	1	2335	0	1588	0	3181	0	6656	3	6700	0
MER44D	57648	5	4223	1	2605	0	2654	2	1441	0	2181	0	2335	0	1588	0	3181	0	6656	2	6700	1
(CGAGG)n	57648	1	4223	0	2605	0	2654	0	1441	0	2181	0	2335	1	1588	0	3181	1	6656	0	6700	0
RMER16_Mm	57648	9	4223	0	2605	0	2654	0	1441	0	2181	0	2335	0	1588	0	3181	0	6656	0	6700	0
L1M2	57648	182	4223	12	2605	2	2654	7	1441	0	2181	8	2335	1	1588	4	3181	1	6656	18	6700	11
Tigger17b	57648	1	4223	0	2605	0	2654	0	1441	1	2181	1	2335	0	1588	0	3181	1	6656	1	6700	0
LTRIS4A	57648	3	4223	0	2605	0	2654	0	1441	0	2181	0	2335	0	1588	0	3181	0	6656	0	6700	0
tRNA-Lys-AAA	57648	1	4223	0	2605	0	2654	0	1441	0	2181	0	2335	0	1588	0	3181	0	6656	0	6700	0
MER106B	57648	0	4223	1	2605	0	2654	0	1441	0	2181	0	2335	0	1588	0	3181	0	6656	0	6700	0
MER47B	57648	8	4223	1	2605	0	2654	0	1441	0	2181	0	2335	0	1588	0	3181	1	6656	1	6700	0
(TACTG)n	57648	1	4223	0	2605	0	2654	0	1441	0	2181	0	2335	0	1588	0	3181	0	6656	0	6700	0
ETnERV-int	57648	7	4223	0	2605	0	2654	0	1441	0	2181	0	2335	1	1588	0	3181	0	6656	0	6700	0
polypyrimidine	57648	24	4223	2	2605	0	2654	0	1441	0	2181	0	2335	0	1588	0	3181	1	6656	2	6700	2
(TTTAG)n	57648	1	4223	0	2605	0	2654	0	1441	0	2181	0	2335	0	1588	0	3181	0	6656	0	6700	0
ERV3-16A3_I-int	57648	8	4223	0	2605	0	2654	0	1441	0	2181	0	2335	0	1588	0	3181	1	6656	5	6700	0
RLTR13G	57648	28	4223	0	2605	0	2654	0	1441	0	2181	0	2335	0	1588	0	3181	1	6656	3	6700	0
Charlie13a	57648	4	4223	0	2605	0	2654	0	1441	0	2181	0	2335	0	1588	0	3181	0	6656	0	6700	0
MER112	57648	5	4223	0	2605	0	2654	0	1441	0	2181	0	2335	0	1588	0	3181	0	6656	0	6700	0
L1ME3G	57648	12	4223	3	2605	0	2654	0	1441	0	2181	0	2335	0	1588	0	3181	0	6656	0	6700	0
LTR82A	57648	3	4223	1	2605	1	2654	0	1441	0	2181	0	2335	0	1588	0	3181	0	6656	0	6700	0
Charlie18a	57648	3	4223	1	2605	0	2654	1	1441	0	2181	0	2335	0	1588	0	3181	0	6656	0	6700	0
Charlie10	57648	5	4223	0	2605	2	2654	0	1441	0	2181	0	2335	0	1588	0	3181	0	6656	0	6700	0
(AGCTG)n	57648	2	4223	0	2605	0	2654	0	1441	0	2181	0	2335	0	1588	0	3181	0	6656	0	6700	0
MER5C1	57648	2	4223	0	2605	0	2654	0	1441	0	2181	0	2335	0	1588	0	3181	0	6656	0	6700	0
GC_rich	57648	569	4223	6	2605	54	2654	13	1441	28	2181	2	2335	110	1588	1	3181	530	6656	0	6700	206
RLTR6C_Mm	57648	0	4223	1	2605	0	2654	0	1441	0	2181	0	2335	0	1588	0	3181	0	6656	1	6700	0
MurERV4-int	57648	36	4223	0	2605	1	2654	0	1441	0	2181	0	2335	0	1588	0	3181	0	6656	3	6700	3
L1M3e	57648	8	4223	1	2605	0	2654	0	1441	0	2181	0	2335	0	1588	0	3181	0	6656	0	6700	1
L1MC5	57648	38	4223	3	2605	1	2654	1	1441	0	2181	2	2335	4	1588	0	3181	0	6656	3	6700	7
MER44A	57648	5	4223	1	2605	0	2654	0	1441	0	2181	0	2335	0	1588	0	3181	1	6656	1	6700	2
MLT2C1	57648	5	4223	0	2605	0	2654	1	1441	0	2181	1	2335	0	1588	0	3181	0	6656	1	6700	1
(CAGCT)n	57648	4	4223	1	2605	0	2654	0	1441	0	2181	0	2335	0	1588	0	3181	0	6656	0	6700	0
RLTR14	57648	26	4223	0	2605	0	2654	1	1441	1	2181	2	2335	0	1588	0	3181	2	6656	2	6700	3
(CGAT)n	57648	1	4223	0	2605	0	2654	0	1441	0	2181	0	2335	0	1588	0	3181	0	6656	0	6700	0
Charlie7	57648	4	4223	2	2605	0	2654	0	1441	0	2181	0	2335	0	1588	0	3181	0	6656	0	6700	1
RLTR1B-int	57648	12	4223	0	2605	0	2654	0	1441	0	2181	0	2335	0	1588	0	3181	0	6656	3	6700	0
L2c	57648	114	4223	2	2605	9	2654	1	1441	2	2181	4	2335	5	1588	0	3181	6	6656	5	6700	10
B1_Mur1	57648	630	4223	70	2605	8	2654	16	1441	13	2181	12	2335	23	1588	5	3181	8	6656	21	6700	81
RLTR31D_MM	57648	57	4223	6	2605	3	2654	5	1441	2	2181	2	2335	2	1588	1	3181	4	6656	6	6700	9
ORR1C1	57648	100	4223	3	2605	1	2654	1	1441	3	2181	3	2335	1	1588	1	3181	3	6656	14	6700	5
LTR16D1	57648	4	4223	0	2605	0	2654	0	1441	0	2181	0	2335	0	1588	0	3181	0	6656	0	6700	0
LTR16B1	57648	2	4223	1	2605	1	2654	0	1441	0	2181	0	2335	0	1588	0	3181	0	6656	1	6700	0
MamRep1527	57648	1	4223	0	2605	0	2654	0	1441	0	2181	0	2335	0	1588	0	3181	0	6656	1	6700	0
RMER1C	57648	79	4223	4	2605	1	2654	4	1441	2	2181	6	2335	0	1588	2	3181	3	6656	20	6700	3
MER88	57648	0	4223	0	2605	0	2654	0	1441	0	2181	0	2335	0	1588	1	3181	0	6656	1	6700	0
(TTAG)n	57648	7	4223	1	2605	0	2654	0	1441	0	2181	1	2335	0	1588	0	3181	0	6656	0	6700	1
IAPLTR2b	57648	7	4223	0	2605	0	2654	1	1441	0	2181	0	2335	0	1588	0	3181	2	6656	2	6700	0
MER117	57648	2	4223	1	2605	0	2654	0	1441	0	2181	2	2335	0	1588	0	3181	0	6656	2	6700	0
ORR1F	57648	235	4223	12	2605	9	2654	7	1441	9	2181	14	2335	0	1588	2	3181	11	6656	36	6700	7
MLT2B1	57648	9	4223	2	2605	1	2654	0	1441	0	2181	1	2335	0	1588	1	3181	2	6656	1	6700	1
RLTR20D	57648	8	4223	0	2605	0	2654	1	1441	0	2181	1	2335	0	1588	0	3181	0	6656	0	6700	1
MLT1K	57648	33	4223	1	2605	3	2654	2	1441	1	2181	1	2335	0	1588	0	3181	1	6656	1	6700	1
ORR1D2-int	57648	23	4223	0	2605	0	2654	1	1441	0	2181	2	2335	0	1588	0	3181	0	6656	3	6700	1
tRNA-Ala-GCY_	57648	31	4223	4	2605	0	2654	2	1441	0	2181	0	2335	1	1588	1	3181	1	6656	1	6700	5
(TATATG)n	57648	35	4223	4	2605	0	2654	0	1441	0	2181	2	2335	0	1588	1	3181	2	6656	6	6700	1
MTA_Mm	57648	90	4223	3	2605	3	2654	4	1441	1	2181	6	2335	1	1588	2	3181	1	6656	16	6700	4
LTR53B	57648	0	4223	0	2605	0	2654	0	1441	0	2181	0	2335	0	1588	0	3181	0	6656	1	6700	1
RMER19A	57648	21	4223	3	2605	1	2654	1	1441	0	2181	3	2335	0	1588	0	3181	0	6656	4	6700	3
RLTR19-int	57648	34	4223	3	2605	0	2654	1	1441	0	2181	0	2335	0	1588	0	3181	0	6656	0	6700	2
(CATCT)n	57648	0	4223	0	2605	0	2654	0	1441	0	2181	0	2335	0	1588	0	3181	0	6656	0	6700	0
RLTR1D2_MM	57648	1	4223	0	2605	0	2654	0	1441	0	2181	0	2335	0	1588	0	3181	0	6656	1	6700	1
MTE2b	57648	134	4223	11	2605	1	2654	8	1441	0	2181	10	2335	1	1588	1	3181	5	6656	14	6700	5
RLTR30B_MM	57648	19	4223	0	2605	0	2654	0	1441	0	2181	0	2335	0	1588	0	3181	0	6656	2	6700	2
IAPEY5_I-int	57648	3	4223	0	2605	0	2654	0	1441	0	2181	0	2335	0	1588	0	3181	0	6656	1	6700	0
L1M4a2	57648	5	4223	1	2605	0	2654	0	1441	0	2181	1	2335	1	1588	1	3181	0	6656	0	6700	0
(TTGTG)n	57648	1	4223	0	2605	0	2654	0	1441	0	2181	0	2335	0	1588	0	3181	0	6656	0	6700	0
ERVB7_2B-LTR_MM	57648	4	4223	0	2605	0	2654	0	1441	0	2181	0	2335	0	1588	0	3181	0	6656	0	6700	0
RLTR13A3	57648	3	4223	1	2605	0	2654	1	1441	0	2181	0	2335	0	1588	0	3181	0	6656	0	6700	0
MER58C	57648	0	4223	0	2605	1	2654	0	1441	0	2181	1	2335	0	1588	0	3181	0	6656	0	6700	0
(CTATT)n	57648	1	4223	0	2605	0	2654	0	1441	0	2181	1	2335	0	1588	0	3181	0	6656	0	6700	0
MLT1E1A-int	57648	1	4223	0	2605	0	2654	0	1441	0	2181	0	2335	0	1588	0	3181	0	6656	0	6700	0
X3_LINE	57648	4	4223	0	2605	0	2654	0	1441	0	2181	0	2335	1	1588	0	3181	0	6656	0	6700	0
B1_Mur3	57648	471	4223	65	2605	4	2654	6	1441	8	2181	8	2335	16	1588	9	3181	4	6656	14	6700	70
tRNA-Pro-CCG	57648	0	4223	0	2605	0	2654	0	1441	0	2181	0	2335	0	1588	0	3181	0	6656	0	6700	0
MamGypLTR1a	57648	0	4223	0	2605	1	2654	0	1441	0	2181	0	2335	0	1588	0	3181	0	6656	0	6700	0
LTR10_RN	57648	2	4223	0	2605	0	2654	0	1441	0	2181	0	2335	0	1588	0	3181	1	6656	0	6700	2
tRNA-His-CAY_	57648	2	4223	0	2605	0	2654	0	1441	0	2181	0	2335	0	1588	0	3181	0	6656	0	6700	0
(CTAAA)n	57648	0	4223	1	2605	0	2654	0	1441	0	2181	0	2335	0	1588	0	3181	0	6656	0	6700	0
ORR1B1	57648	196	4223	10	2605	3	2654	6	1441	2	2181	10	2335	3	1588	1	3181	5	6656	29	6700	14
RLTR12B	57648	6	4223	0	2605	0	2654	0	1441	0	2181	1	2335	0	1588	0	3181	0	6656	0	6700	2
L1ME3	57648	23	4223	6	2605	0	2654	0	1441	0	2181	0	2335	0	1588	1	3181	1	6656	2	6700	0
ORR1B2-int	57648	9	4223	0	2605	0	2654	0	1441	1	2181	0	2335	0	1588	0	3181	0	6656	2	6700	0
RMER21B	57648	12	4223	1	2605	0	2654	1	1441	0	2181	1	2335	0	1588	0	3181	0	6656	0	6700	1
MADE2	57648	1	4223	0	2605	0	2654	0	1441	0	2181	1	2335	0	1588	0	3181	0	6656	0	6700	0
MLTR31A_MM	57648	3	4223	1	2605	0	2654	1	1441	0	2181	0	2335	0	1588	0	3181	2	6656	0	6700	0
B2_Mm1a	57648	2879	4223	72	2605	16	2654	25	1441	24	2181	26	2335	27	1588	13	3181	15	6656	65	6700	216
MER54B	57648	0	4223	0	2605	0	2654	0	1441	0	2181	0	2335	0	1588	0	3181	0	6656	1	6700	0
IAPLTR4	57648	0	4223	0	2605	0	2654	0	1441	0	2181	1	2335	0	1588	0	3181	0	6656	1	6700	0
RMER6A	57648	55	4223	5	2605	1	2654	1	1441	0	2181	0	2335	0	1588	0	3181	0	6656	4	6700	3
MER102a	57648	8	4223	0	2605	0	2654	0	1441	0	2181	0	2335	0	1588	0	3181	0	6656	0	6700	1
L1MD1	57648	31	4223	5	2605	2	2654	2	1441	0	2181	0	2335	0	1588	0	3181	0	6656	3	6700	3
L1MEb	57648	4	4223	0	2605	0	2654	0	1441	0	2181	1	2335	0	1588	0	3181	0	6656	0	6700	1
IAPEz-int	57648	68	4223	1	2605	0	2654	2	1441	0	2181	3	2335	1	1588	0	3181	0	6656	19	6700	0
tRNA-Ile-ATT	57648	1	4223	0	2605	0	2654	0	1441	0	2181	0	2335	0	1588	0	3181	0	6656	0	6700	1
L1MB2	57648	40	4223	4	2605	0	2654	1	1441	0	2181	0	2335	0	1588	0	3181	0	6656	3	6700	7
LTR40c	57648	4	4223	0	2605	1	2654	0	1441	0	2181	1	2335	0	1588	0	3181	1	6656	2	6700	1
Charlie14a	57648	1	4223	0	2605	0	2654	0	1441	0	2181	0	2335	1	1588	0	3181	0	6656	0	6700	0
MMERVK9C_I-int	57648	21	4223	3	2605	0	2654	0	1441	0	2181	0	2335	0	1588	0	3181	2	6656	2	6700	0
MamRep1879	57648	2	4223	0	2605	0	2654	0	1441	1	2181	0	2335	0	1588	0	3181	1	6656	0	6700	0
RLTR20A	57648	5	4223	0	2605	0	2654	0	1441	0	2181	0	2335	0	1588	0	3181	0	6656	0	6700	1
RLTR45-int	57648	5	4223	0	2605	0	2654	0	1441	0	2181	0	2335	0	1588	0	3181	0	6656	0	6700	0
(TTC)n	57648	56	4223	6	2605	4	2654	2	1441	0	2181	3	2335	2	1588	3	3181	0	6656	9	6700	6
MLT1E2	57648	16	4223	1	2605	1	2654	0	1441	2	2181	1	2335	0	1588	0	3181	1	6656	2	6700	1
RLTR44B	57648	3	4223	0	2605	0	2654	0	1441	0	2181	0	2335	0	1588	0	3181	0	6656	0	6700	0
(CTCG)n	57648	11	4223	0	2605	0	2654	1	1441	0	2181	0	2335	0	1588	0	3181	6	6656	0	6700	2
(GAA)n	57648	47	4223	1	2605	3	2654	0	1441	1	2181	1	2335	2	1588	2	3181	3	6656	7	6700	2
(CAGT)n	57648	4	4223	0	2605	0	2654	0	1441	0	2181	0	2335	0	1588	0	3181	0	6656	0	6700	0
MIRb	57648	455	4223	34	2605	34	2654	21	1441	9	2181	20	2335	21	1588	14	3181	26	6656	55	6700	48
MamTip1	57648	4	4223	0	2605	0	2654	0	1441	0	2181	0	2335	0	1588	0	3181	0	6656	0	6700	0
IAPLTR2a2_Mm	57648	5	4223	0	2605	1	2654	1	1441	0	2181	1	2335	0	1588	0	3181	0	6656	2	6700	0
Lx5b	57648	54	4223	3	2605	2	2654	2	1441	1	2181	7	2335	1	1588	1	3181	5	6656	20	6700	1
(CACTG)n	57648	2	4223	0	2605	0	2654	1	1441	0	2181	0	2335	0	1588	0	3181	0	6656	0	6700	0
L1_Mur2	57648	143	4223	0	2605	6	2654	1	1441	1	2181	8	2335	1	1588	3	3181	5	6656	34	6700	1
RMER4A	57648	42	4223	2	2605	0	2654	0	1441	0	2181	2	2335	1	1588	0	3181	0	6656	2	6700	7
MLT1C	57648	81	4223	6	2605	4	2654	3	1441	3	2181	4	2335	1	1588	1	3181	4	6656	10	6700	1
MamRep564	57648	7	4223	0	2605	0	2654	0	1441	0	2181	0	2335	1	1588	1	3181	0	6656	0	6700	1
MERVK26-int	57648	21	4223	1	2605	0	2654	0	1441	0	2181	2	2335	0	1588	0	3181	1	6656	6	6700	2
(TTTTTA)n	57648	13	4223	1	2605	0	2654	1	1441	0	2181	0	2335	0	1588	1	3181	0	6656	0	6700	1
ORR1A3	57648	57	4223	2	2605	3	2654	2	1441	1	2181	2	2335	0	1588	1	3181	0	6656	5	6700	0
RLTR20B5_MM	57648	6	4223	0	2605	0	2654	0	1441	0	2181	1	2335	0	1588	0	3181	0	6656	1	6700	1
RLTR20A3_MM	57648	16	4223	1	2605	0	2654	1	1441	0	2181	0	2335	0	1588	1	3181	0	6656	1	6700	4
LTR41	57648	28	4223	5	2605	7	2654	4	1441	3	2181	3	2335	1	1588	0	3181	2	6656	8	6700	6
(TTTC)n	57648	211	4223	16	2605	4	2654	4	1441	3	2181	4	2335	3	1588	1	3181	4	6656	13	6700	28
ERVB4_1B-I_MM-int	57648	3	4223	2	2605	1	2654	0	1441	0	2181	0	2335	0	1588	0	3181	0	6656	1	6700	0
(GAAA)n	57648	208	4223	16	2605	2	2654	5	1441	4	2181	5	2335	5	1588	3	3181	5	6656	21	6700	21
ORR1E-int	57648	12	4223	0	2605	1	2654	0	1441	0	2181	3	2335	0	1588	0	3181	1	6656	5	6700	1
RLTR30D_MM	57648	5	4223	0	2605	0	2654	0	1441	0	2181	0	2335	0	1588	0	3181	0	6656	0	6700	0
RLTR49	57648	9	4223	0	2605	0	2654	0	1441	0	2181	1	2335	0	1588	0	3181	0	6656	1	6700	1
tRNA-Thr-ACG	57648	1	4223	0	2605	0	2654	0	1441	0	2181	0	2335	0	1588	0	3181	0	6656	0	6700	0
(TCC)n	57648	80	4223	6	2605	2	2654	6	1441	0	2181	3	2335	0	1588	2	3181	6	6656	12	6700	9
Lx8	57648	489	4223	19	2605	17	2654	30	1441	9	2181	18	2335	3	1588	11	3181	12	6656	109	6700	24
(GGGAGA)n	57648	15	4223	1	2605	2	2654	1	1441	2	2181	0	2335	0	1588	1	3181	1	6656	2	6700	1
(CCCCCA)n	57648	27	4223	2	2605	4	2654	1	1441	1	2181	0	2335	2	1588	1	3181	3	6656	1	6700	9
(TC)n	57648	395	4223	50	2605	9	2654	23	1441	5	2181	16	2335	9	1588	13	3181	14	6656	52	6700	24
L1MC5a	57648	34	4223	1	2605	0	2654	1	1441	0	2181	0	2335	0	1588	0	3181	0	6656	5	6700	1
L1M	57648	8	4223	2	2605	0	2654	0	1441	1	2181	0	2335	0	1588	0	3181	1	6656	2	6700	1
Tigger9b	57648	5	4223	0	2605	0	2654	1	1441	0	2181	0	2335	0	1588	0	3181	0	6656	0	6700	0
(CGAG)n	57648	5	4223	0	2605	0	2654	0	1441	0	2181	0	2335	2	1588	0	3181	5	6656	0	6700	0
MT2_Mm	57648	10	4223	0	2605	0	2654	0	1441	0	2181	0	2335	0	1588	0	3181	1	6656	2	6700	1
B1_Mm	57648	848	4223	86	2605	10	2654	24	1441	14	2181	18	2335	17	1588	10	3181	15	6656	32	6700	99
(CTA)n	57648	7	4223	0	2605	0	2654	0	1441	0	2181	1	2335	0	1588	0	3181	0	6656	0	6700	0
MER126	57648	4	4223	0	2605	0	2654	0	1441	0	2181	0	2335	0	1588	0	3181	0	6656	0	6700	0
Lx7	57648	273	4223	8	2605	9	2654	12	1441	2	2181	9	2335	3	1588	2	3181	7	6656	43	6700	6
RLTR6B_Mm	57648	94	4223	2	2605	0	2654	1	1441	0	2181	3	2335	0	1588	2	3181	2	6656	37	6700	2
U13	57648	0	4223	0	2605	0	2654	0	1441	0	2181	0	2335	0	1588	0	3181	0	6656	1	6700	0
RLTR31M	57648	3	4223	0	2605	0	2654	0	1441	0	2181	0	2335	0	1588	0	3181	0	6656	1	6700	0
Charlie4	57648	0	4223	0	2605	1	2654	0	1441	0	2181	0	2335	0	1588	0	3181	0	6656	1	6700	0
ORR1A0	57648	12	4223	0	2605	0	2654	0	1441	0	2181	0	2335	0	1588	0	3181	0	6656	1	6700	0
MMERGLN_LTR	57648	14	4223	0	2605	2	2654	0	1441	0	2181	1	2335	0	1588	0	3181	0	6656	1	6700	1
RLTR31B2	57648	9	4223	0	2605	0	2654	0	1441	0	2181	0	2335	0	1588	0	3181	0	6656	1	6700	2
LTR88a	57648	1	4223	0	2605	0	2654	0	1441	0	2181	1	2335	0	1588	0	3181	0	6656	0	6700	0
L1P5	57648	0	4223	0	2605	0	2654	0	1441	0	2181	0	2335	0	1588	0	3181	0	6656	0	6700	1
LTR101_Mam	57648	3	4223	0	2605	0	2654	0	1441	0	2181	0	2335	0	1588	0	3181	0	6656	0	6700	0
Lx2B2	57648	113	4223	0	2605	9	2654	4	1441	1	2181	9	2335	0	1588	3	3181	5	6656	38	6700	2
LTR81	57648	1	4223	0	2605	0	2654	0	1441	0	2181	0	2335	0	1588	0	3181	1	6656	1	6700	0
L1MA6	57648	50	4223	7	2605	2	2654	5	1441	0	2181	4	2335	1	1588	4	3181	3	6656	9	6700	1
(CAAAAA)n	57648	86	4223	10	2605	7	2654	7	1441	1	2181	2	2335	1	1588	2	3181	3	6656	13	6700	8
L1ME3Cz	57648	7	4223	2	2605	0	2654	1	1441	1	2181	0	2335	0	1588	1	3181	1	6656	3	6700	0
LTR81B	57648	1	4223	0	2605	0	2654	0	1441	0	2181	0	2335	0	1588	0	3181	0	6656	0	6700	0
(TGAG)n	57648	5	4223	0	2605	0	2654	0	1441	0	2181	0	2335	0	1588	0	3181	1	6656	1	6700	0
tRNA-Pro-CCY	57648	2	4223	0	2605	0	2654	0	1441	0	2181	0	2335	0	1588	2	3181	0	6656	0	6700	0
(CACCC)n	57648	15	4223	1	2605	1	2654	0	1441	0	2181	0	2335	2	1588	0	3181	2	6656	0	6700	7
BGLII_Mur	57648	3	4223	1	2605	1	2654	1	1441	0	2181	0	2335	0	1588	0	3181	0	6656	1	6700	0
MER21B	57648	13	4223	3	2605	0	2654	0	1441	0	2181	0	2335	1	1588	0	3181	0	6656	2	6700	1
LTR16B2	57648	2	4223	0	2605	0	2654	0	1441	0	2181	1	2335	0	1588	0	3181	0	6656	1	6700	0
(CTAA)n	57648	3	4223	0	2605	0	2654	1	1441	0	2181	0	2335	0	1588	0	3181	0	6656	0	6700	0
MER92-int	57648	4	4223	0	2605	0	2654	0	1441	0	2181	0	2335	0	1588	0	3181	0	6656	0	6700	0
(CCGG)n	57648	1	4223	0	2605	0	2654	0	1441	0	2181	0	2335	1	1588	0	3181	1	6656	0	6700	0
RLTR30C_MM	57648	1	4223	0	2605	0	2654	0	1441	0	2181	0	2335	0	1588	0	3181	0	6656	0	6700	0
L1ME2	57648	30	4223	3	2605	0	2654	3	1441	0	2181	2	2335	1	1588	0	3181	0	6656	2	6700	3
MER90a	57648	4	4223	0	2605	0	2654	1	1441	0	2181	1	2335	1	1588	2	3181	0	6656	0	6700	1
IAPLTR1_Mm	57648	44	4223	6	2605	0	2654	2	1441	0	2181	7	2335	0	1588	0	3181	1	6656	18	6700	0
Charlie12	57648	13	4223	1	2605	0	2654	0	1441	0	2181	0	2335	1	1588	1	3181	0	6656	1	6700	0
RMER17C2	57648	42	4223	3	2605	0	2654	2	1441	0	2181	0	2335	2	1588	0	3181	2	6656	7	6700	2
(CAAGC)n	57648	1	4223	0	2605	0	2654	0	1441	0	2181	0	2335	0	1588	0	3181	0	6656	0	6700	0
LTR16E1	57648	2	4223	2	2605	1	2654	1	1441	1	2181	0	2335	0	1588	0	3181	0	6656	1	6700	0
LTR78B	57648	3	4223	1	2605	1	2654	0	1441	0	2181	0	2335	0	1588	0	3181	0	6656	0	6700	1
L1M4	57648	162	4223	26	2605	5	2654	16	1441	1	2181	9	2335	2	1588	1	3181	8	6656	22	6700	14
MLT1E2-int	57648	1	4223	0	2605	0	2654	0	1441	0	2181	0	2335	0	1588	0	3181	0	6656	0	6700	0
RMER13A2	57648	18	4223	0	2605	0	2654	2	1441	0	2181	0	2335	1	1588	0	3181	1	6656	6	6700	0
Plat_L3	57648	4	4223	0	2605	0	2654	0	1441	1	2181	0	2335	1	1588	0	3181	0	6656	1	6700	0
MT2B1	57648	57	4223	1	2605	1	2654	3	1441	0	2181	3	2335	1	1588	2	3181	1	6656	12	6700	4
LTR86B2	57648	0	4223	0	2605	0	2654	0	1441	0	2181	0	2335	0	1588	0	3181	0	6656	0	6700	0
RLTR14_RN	57648	13	4223	0	2605	0	2654	1	1441	0	2181	0	2335	0	1588	0	3181	0	6656	1	6700	0
IAPLTR3	57648	0	4223	0	2605	0	2654	0	1441	0	2181	0	2335	0	1588	0	3181	0	6656	1	6700	0
(CATCC)n	57648	1	4223	0	2605	0	2654	0	1441	0	2181	0	2335	0	1588	0	3181	0	6656	0	6700	0
L1ME3E	57648	9	4223	0	2605	0	2654	1	1441	0	2181	0	2335	0	1588	0	3181	0	6656	1	6700	0
LTR108c_Mam	57648	0	4223	0	2605	0	2654	0	1441	0	2181	0	2335	1	1588	0	3181	0	6656	0	6700	0
RMER5	57648	87	4223	7	2605	3	2654	3	1441	1	2181	2	2335	1	1588	3	3181	2	6656	14	6700	10
Arthur1B	57648	8	4223	1	2605	0	2654	1	1441	0	2181	0	2335	0	1588	0	3181	0	6656	1	6700	1
Charlie9	57648	2	4223	0	2605	0	2654	0	1441	0	2181	0	2335	1	1588	0	3181	0	6656	1	6700	0
RLTR13E	57648	4	4223	0	2605	0	2654	0	1441	0	2181	0	2335	0	1588	1	3181	0	6656	0	6700	1
MER57E1	57648	1	4223	0	2605	0	2654	1	1441	0	2181	0	2335	0	1588	0	3181	0	6656	0	6700	0
(TATTG)n	57648	3	4223	0	2605	0	2654	1	1441	0	2181	0	2335	0	1588	0	3181	0	6656	0	6700	0
L1MA9	57648	37	4223	6	2605	1	2654	4	1441	1	2181	1	2335	0	1588	0	3181	2	6656	7	6700	0
(CACTC)n	57648	1	4223	0	2605	0	2654	2	1441	0	2181	0	2335	0	1588	0	3181	1	6656	0	6700	0
L1MA4	57648	70	4223	6	2605	3	2654	1	1441	2	2181	4	2335	0	1588	0	3181	1	6656	12	6700	4
MLT1I	57648	21	4223	2	2605	0	2654	3	1441	0	2181	1	2335	0	1588	3	3181	1	6656	1	6700	1
(TCCCC)n	57648	12	4223	0	2605	0	2654	0	1441	0	2181	2	2335	1	1588	1	3181	2	6656	2	6700	2
MER115	57648	8	4223	0	2605	0	2654	0	1441	0	2181	1	2335	0	1588	0	3181	0	6656	0	6700	0
MMETn-int	57648	9	4223	0	2605	0	2654	0	1441	0	2181	0	2335	0	1588	0	3181	0	6656	0	6700	0
(CATAT)n	57648	1	4223	0	2605	0	2654	0	1441	0	2181	0	2335	0	1588	0	3181	0	6656	0	6700	0
LTR40a	57648	1	4223	0	2605	0	2654	0	1441	0	2181	0	2335	0	1588	0	3181	0	6656	1	6700	0
Charlie22a	57648	0	4223	0	2605	1	2654	0	1441	0	2181	0	2335	0	1588	0	3181	0	6656	1	6700	1
RLTR12BD_Mm	57648	13	4223	0	2605	0	2654	0	1441	0	2181	1	2335	0	1588	0	3181	0	6656	1	6700	0
(CCCTA)n	57648	0	4223	0	2605	0	2654	0	1441	0	2181	0	2335	0	1588	0	3181	0	6656	0	6700	0
RLTR46A	57648	6	4223	1	2605	0	2654	2	1441	0	2181	1	2335	0	1588	0	3181	2	6656	3	6700	1
ORR1D1	57648	219	4223	14	2605	3	2654	5	1441	3	2181	8	2335	3	1588	3	3181	3	6656	34	6700	12
(TG)n	57648	1248	4223	171	2605	35	2654	82	1441	20	2181	72	2335	35	1588	25	3181	53	6656	126	6700	114
MER92B	57648	2	4223	0	2605	0	2654	0	1441	0	2181	0	2335	0	1588	0	3181	0	6656	0	6700	0
(GGAAA)n	57648	14	4223	0	2605	0	2654	2	1441	0	2181	1	2335	1	1588	0	3181	0	6656	2	6700	1
RLTR26B_MM	57648	8	4223	0	2605	0	2654	0	1441	0	2181	2	2335	0	1588	0	3181	0	6656	2	6700	0
MMAR1	57648	3	4223	1	2605	0	2654	0	1441	0	2181	0	2335	0	1588	0	3181	0	6656	0	6700	1
RLTR26D_MM	57648	3	4223	0	2605	0	2654	1	1441	0	2181	1	2335	0	1588	0	3181	0	6656	2	6700	0
RLTR20C2_MM	57648	28	4223	6	2605	0	2654	1	1441	0	2181	1	2335	0	1588	0	3181	1	6656	1	6700	1
L3b	57648	16	4223	0	2605	1	2654	0	1441	2	2181	0	2335	1	1588	1	3181	0	6656	2	6700	0
RMER1A	57648	115	4223	6	2605	4	2654	8	1441	4	2181	8	2335	0	1588	0	3181	4	6656	22	6700	9
RLTR10A	57648	1	4223	0	2605	0	2654	0	1441	0	2181	0	2335	0	1588	0	3181	0	6656	1	6700	0
MLT1F-int	57648	6	4223	1	2605	0	2654	1	1441	0	2181	0	2335	0	1588	0	3181	0	6656	0	6700	0
Eulor5A	57648	1	4223	0	2605	0	2654	0	1441	0	2181	0	2335	0	1588	0	3181	0	6656	0	6700	0
Tigger13a	57648	8	4223	0	2605	0	2654	0	1441	0	2181	0	2335	0	1588	0	3181	0	6656	0	6700	1
LSU-rRNA_Hsa	57648	0	4223	1	2605	0	2654	0	1441	0	2181	0	2335	0	1588	0	3181	0	6656	0	6700	0
Ricksha_0	57648	1	4223	0	2605	0	2654	0	1441	0	2181	0	2335	0	1588	0	3181	0	6656	0	6700	0
MER63D	57648	9	4223	2	2605	0	2654	0	1441	0	2181	2	2335	0	1588	0	3181	0	6656	0	6700	0
L1MA10	57648	4	4223	0	2605	0	2654	1	1441	0	2181	0	2335	0	1588	0	3181	2	6656	2	6700	0
polypurine	57648	18	4223	2	2605	0	2654	1	1441	0	2181	1	2335	1	1588	0	3181	0	6656	0	6700	3
MamRep488	57648	1	4223	0	2605	0	2654	0	1441	0	2181	0	2335	0	1588	0	3181	0	6656	0	6700	1
RMER16B2	57648	2	4223	0	2605	0	2654	0	1441	0	2181	1	2335	0	1588	0	3181	0	6656	0	6700	0
L1MB4	57648	38	4223	3	2605	1	2654	1	1441	1	2181	1	2335	0	1588	0	3181	2	6656	4	6700	5
(TTTTTG)n	57648	91	4223	9	2605	7	2654	3	1441	1	2181	3	2335	4	1588	2	3181	3	6656	8	6700	10
Kanga1a	57648	6	4223	0	2605	0	2654	0	1441	0	2181	0	2335	0	1588	0	3181	0	6656	0	6700	1
L1M4c	57648	27	4223	2	2605	0	2654	2	1441	0	2181	0	2335	0	1588	0	3181	0	6656	2	6700	5
MRLTR33	57648	6	4223	0	2605	1	2654	0	1441	0	2181	0	2335	0	1588	0	3181	0	6656	0	6700	0
MTEa	57648	214	4223	19	2605	5	2654	17	1441	1	2181	14	2335	3	1588	1	3181	8	6656	26	6700	12
(CCTTG)n	57648	1	4223	0	2605	0	2654	0	1441	0	2181	0	2335	0	1588	0	3181	0	6656	0	6700	0
RLTR25A	57648	22	4223	1	2605	0	2654	1	1441	0	2181	1	2335	0	1588	0	3181	0	6656	2	6700	2
Helitron1Na_Mam	57648	1	4223	0	2605	0	2654	0	1441	0	2181	0	2335	0	1588	0	3181	0	6656	0	6700	0
(GTTTG)n	57648	22	4223	4	2605	0	2654	0	1441	0	2181	2	2335	1	1588	0	3181	1	6656	0	6700	3
tRNA-Met_	57648	0	4223	0	2605	0	2654	0	1441	0	2181	0	2335	0	1588	0	3181	0	6656	0	6700	0
RLTR18-int	57648	14	4223	0	2605	0	2654	0	1441	1	2181	0	2335	0	1588	1	3181	1	6656	0	6700	1
RLTR12D	57648	6	4223	2	2605	0	2654	0	1441	0	2181	0	2335	0	1588	0	3181	1	6656	2	6700	1
HERVL74-int	57648	1	4223	0	2605	0	2654	0	1441	0	2181	0	2335	0	1588	0	3181	0	6656	0	6700	0
Charlie1b	57648	17	4223	1	2605	0	2654	2	1441	0	2181	0	2335	0	1588	0	3181	0	6656	0	6700	1
(CATAC)n	57648	0	4223	0	2605	0	2654	0	1441	0	2181	1	2335	0	1588	0	3181	0	6656	0	6700	0
MLTR31C_MM	57648	4	4223	0	2605	0	2654	0	1441	0	2181	0	2335	0	1588	0	3181	0	6656	0	6700	0
A-rich	57648	309	4223	25	2605	6	2654	13	1441	2	2181	9	2335	10	1588	5	3181	8	6656	20	6700	34
(CTG)n	57648	34	4223	2	2605	5	2654	1	1441	0	2181	3	2335	2	1588	0	3181	9	6656	7	6700	8
HAL1	57648	31	4223	3	2605	1	2654	2	1441	0	2181	1	2335	1	1588	0	3181	1	6656	1	6700	6
(CGGTG)n	57648	1	4223	0	2605	0	2654	0	1441	0	2181	0	2335	0	1588	0	3181	0	6656	0	6700	0
(TCCTG)n	57648	1	4223	0	2605	0	2654	2	1441	1	2181	1	2335	0	1588	0	3181	1	6656	0	6700	0
MLT2B3	57648	15	4223	0	2605	1	2654	2	1441	0	2181	1	2335	0	1588	0	3181	0	6656	2	6700	2
RLTR12F	57648	1	4223	0	2605	0	2654	0	1441	0	2181	0	2335	0	1588	0	3181	0	6656	0	6700	0
ERVB3_1-LTR_MM	57648	4	4223	0	2605	0	2654	0	1441	0	2181	0	2335	0	1588	0	3181	0	6656	0	6700	0
RLTR1E_MM	57648	7	4223	0	2605	0	2654	0	1441	0	2181	0	2335	0	1588	0	3181	0	6656	2	6700	0
RLTR10B2	57648	4	4223	1	2605	0	2654	1	1441	0	2181	1	2335	0	1588	0	3181	0	6656	3	6700	0
MARNA	57648	4	4223	0	2605	0	2654	0	1441	0	2181	0	2335	0	1588	0	3181	0	6656	0	6700	0
(CCTCG)n	57648	1	4223	0	2605	0	2654	0	1441	0	2181	0	2335	0	1588	0	3181	0	6656	0	6700	0
U2	57648	10	4223	1	2605	0	2654	0	1441	0	2181	0	2335	0	1588	0	3181	0	6656	2	6700	1
MLT1J1	57648	10	4223	0	2605	0	2654	0	1441	1	2181	0	2335	0	1588	1	3181	0	6656	2	6700	1
(TGG)n	57648	39	4223	3	2605	3	2654	2	1441	0	2181	1	2335	4	1588	1	3181	3	6656	5	6700	7
(CAGG)n	57648	21	4223	0	2605	0	2654	0	1441	0	2181	1	2335	0	1588	0	3181	2	6656	0	6700	1
ID4_	57648	271	4223	31	2605	3	2654	6	1441	8	2181	8	2335	12	1588	2	3181	8	6656	18	6700	37
Zaphod2	57648	8	4223	1	2605	0	2654	0	1441	0	2181	0	2335	0	1588	0	3181	0	6656	0	6700	0
LTR52	57648	3	4223	1	2605	1	2654	1	1441	0	2181	0	2335	0	1588	0	3181	0	6656	0	6700	0
RLTR13D2	57648	24	4223	0	2605	0	2654	0	1441	0	2181	0	2335	0	1588	0	3181	0	6656	3	6700	0
L4_C_Mam	57648	4	4223	0	2605	1	2654	0	1441	0	2181	0	2335	1	1588	0	3181	0	6656	0	6700	0
(GAATG)n	57648	1	4223	0	2605	0	2654	0	1441	0	2181	0	2335	0	1588	0	3181	0	6656	0	6700	0
Helitron1Nb_Mam	57648	1	4223	0	2605	0	2654	1	1441	0	2181	0	2335	0	1588	0	3181	0	6656	1	6700	0
MER34	57648	7	4223	0	2605	0	2654	2	1441	0	2181	0	2335	0	1588	0	3181	0	6656	0	6700	1
MER5C	57648	2	4223	0	2605	0	2654	0	1441	0	2181	1	2335	0	1588	0	3181	0	6656	0	6700	0
Arthur1	57648	7	4223	0	2605	0	2654	0	1441	0	2181	0	2335	0	1588	0	3181	0	6656	1	6700	0
MamRep434	57648	4	4223	0	2605	0	2654	0	1441	0	2181	0	2335	0	1588	0	3181	0	6656	0	6700	0
(TGGG)n	57648	3	4223	0	2605	0	2654	1	1441	0	2181	0	2335	1	1588	0	3181	1	6656	1	6700	2
(CAAAG)n	57648	3	4223	0	2605	1	2654	0	1441	0	2181	0	2335	0	1588	0	3181	0	6656	0	6700	0
(CTTTG)n	57648	5	4223	0	2605	1	2654	0	1441	0	2181	0	2335	0	1588	0	3181	0	6656	0	6700	2
RLTR50B	57648	0	4223	0	2605	0	2654	0	1441	0	2181	0	2335	1	1588	0	3181	0	6656	0	6700	0
MamRep1151	57648	3	4223	0	2605	0	2654	0	1441	0	2181	0	2335	0	1588	0	3181	0	6656	0	6700	1
LTR108e_Mam	57648	0	4223	0	2605	0	2654	0	1441	0	2181	0	2335	1	1588	0	3181	0	6656	0	6700	0
(GGTTG)n	57648	0	4223	0	2605	0	2654	0	1441	0	2181	0	2335	0	1588	0	3181	0	6656	0	6700	0
RLTR8	57648	5	4223	1	2605	0	2654	0	1441	0	2181	0	2335	0	1588	0	3181	0	6656	1	6700	0
RLTR24B_MM	57648	4	4223	0	2605	1	2654	0	1441	0	2181	0	2335	1	1588	0	3181	1	6656	3	6700	0
tRNA-Tyr-TAC	57648	1	4223	0	2605	0	2654	0	1441	0	2181	0	2335	0	1588	0	3181	0	6656	0	6700	0
ETnERV2-int	57648	14	4223	0	2605	1	2654	0	1441	0	2181	0	2335	0	1588	0	3181	0	6656	3	6700	1
(CGG)n	57648	68	4223	0	2605	5	2654	4	1441	2	2181	1	2335	12	1588	0	3181	95	6656	0	6700	33
RLTR26	57648	3	4223	0	2605	0	2654	0	1441	0	2181	0	2335	0	1588	1	3181	0	6656	1	6700	0
Charlie2b	57648	6	4223	1	2605	0	2654	1	1441	0	2181	0	2335	0	1588	0	3181	0	6656	2	6700	2
Ricksha_c	57648	1	4223	0	2605	0	2654	0	1441	0	2181	0	2335	0	1588	0	3181	0	6656	0	6700	1
L1Md_A	57648	77	4223	3	2605	0	2654	4	1441	2	2181	4	2335	0	1588	1	3181	2	6656	14	6700	1
(CAGGA)n	57648	1	4223	0	2605	0	2654	0	1441	0	2181	0	2335	0	1588	0	3181	1	6656	0	6700	0
(GGAGA)n	57648	7	4223	1	2605	0	2654	0	1441	0	2181	1	2335	0	1588	0	3181	0	6656	1	6700	1
RLTR13C3	57648	18	4223	0	2605	0	2654	0	1441	1	2181	1	2335	0	1588	0	3181	0	6656	3	6700	0
Lx4A	57648	114	4223	3	2605	10	2654	4	1441	2	2181	9	2335	3	1588	1	3181	1	6656	27	6700	4
ORR1G-int	57648	1	4223	0	2605	0	2654	0	1441	0	2181	0	2335	0	1588	0	3181	0	6656	0	6700	0
MLTR18_MM	57648	7	4223	0	2605	0	2654	0	1441	1	2181	0	2335	0	1588	0	3181	0	6656	1	6700	1
MER52-int	57648	3	4223	0	2605	0	2654	0	1441	0	2181	0	2335	0	1588	0	3181	0	6656	0	6700	0
(CGGG)n	57648	7	4223	0	2605	1	2654	1	1441	2	2181	0	2335	6	1588	0	3181	8	6656	0	6700	3
(CAACC)n	57648	2	4223	0	2605	0	2654	0	1441	0	2181	0	2335	0	1588	1	3181	0	6656	0	6700	0
RLTR9B2	57648	2	4223	0	2605	0	2654	0	1441	0	2181	0	2335	0	1588	0	3181	0	6656	0	6700	0
Lx	57648	144	4223	3	2605	10	2654	8	1441	1	2181	11	2335	1	1588	1	3181	3	6656	41	6700	3
Lx8b	57648	160	4223	6	2605	6	2654	7	1441	2	2181	8	2335	0	1588	3	3181	5	6656	38	6700	12
RLTR53B_Mm	57648	5	4223	0	2605	0	2654	1	1441	1	2181	0	2335	0	1588	0	3181	0	6656	0	6700	1
Tigger14a	57648	0	4223	0	2605	0	2654	0	1441	0	2181	0	2335	0	1588	0	3181	0	6656	1	6700	0
RMER12B	57648	10	4223	2	2605	0	2654	0	1441	0	2181	0	2335	0	1588	0	3181	0	6656	1	6700	0
MMVL30-int	57648	24	4223	1	2605	0	2654	2	1441	0	2181	0	2335	0	1588	0	3181	1	6656	5	6700	1
MT2B	57648	194	4223	23	2605	2	2654	3	1441	4	2181	3	2335	5	1588	2	3181	5	6656	7	6700	20
L1ME2z	57648	18	4223	6	2605	1	2654	1	1441	0	2181	1	2335	0	1588	0	3181	0	6656	2	6700	2
(TTAA)n	57648	52	4223	8	2605	1	2654	1	1441	0	2181	2	2335	0	1588	1	3181	1	6656	5	6700	3
RLTR17D_Mm	57648	11	4223	0	2605	0	2654	0	1441	0	2181	0	2335	0	1588	0	3181	0	6656	1	6700	0
Charlie2a	57648	2	4223	0	2605	0	2654	0	1441	0	2181	0	2335	0	1588	0	3181	0	6656	1	6700	0
U3	57648	1	4223	0	2605	0	2654	0	1441	0	2181	0	2335	0	1588	0	3181	0	6656	0	6700	0
(CTAAT)n	57648	2	4223	0	2605	0	2654	0	1441	0	2181	0	2335	0	1588	0	3181	0	6656	0	6700	0
L1MB7	57648	95	4223	9	2605	1	2654	8	1441	1	2181	7	2335	0	1588	2	3181	3	6656	8	6700	10
tRNA-Ala-GCY	57648	0	4223	0	2605	0	2654	0	1441	0	2181	0	2335	0	1588	0	3181	0	6656	0	6700	0
(ATG)n	57648	16	4223	5	2605	2	2654	0	1441	0	2181	1	2335	0	1588	0	3181	0	6656	2	6700	0
(GTGTG)n	57648	3	4223	0	2605	0	2654	0	1441	0	2181	0	2335	0	1588	0	3181	0	6656	0	6700	0
ERVL-B4-int	57648	12	4223	0	2605	0	2654	0	1441	0	2181	1	2335	0	1588	0	3181	1	6656	1	6700	1
BLACKJACK	57648	9	4223	1	2605	1	2654	2	1441	1	2181	3	2335	0	1588	2	3181	0	6656	1	6700	0
L1MEd	57648	45	4223	7	2605	1	2654	2	1441	0	2181	1	2335	0	1588	0	3181	2	6656	2	6700	3
MER20B	57648	22	4223	0	2605	1	2654	2	1441	1	2181	1	2335	1	1588	1	3181	0	6656	4	6700	2
FordPrefect	57648	3	4223	0	2605	0	2654	0	1441	1	2181	0	2335	0	1588	0	3181	0	6656	0	6700	0
(AGATG)n	57648	1	4223	0	2605	0	2654	0	1441	0	2181	0	2335	0	1588	0	3181	0	6656	0	6700	0
Charlie17b	57648	3	4223	1	2605	0	2654	0	1441	0	2181	0	2335	0	1588	0	3181	0	6656	0	6700	0
RLTR20B3	57648	13	4223	0	2605	0	2654	0	1441	0	2181	1	2335	0	1588	0	3181	0	6656	3	6700	0
LTR58	57648	0	4223	1	2605	0	2654	0	1441	0	2181	0	2335	0	1588	0	3181	0	6656	0	6700	0
Lx3B	57648	39	4223	0	2605	0	2654	3	1441	0	2181	0	2335	0	1588	0	3181	0	6656	12	6700	2
(CTCGG)n	57648	4	4223	0	2605	0	2654	0	1441	0	2181	0	2335	0	1588	0	3181	3	6656	0	6700	0
RLTR34D_MM	57648	7	4223	0	2605	0	2654	0	1441	0	2181	0	2335	0	1588	0	3181	0	6656	2	6700	0
L1MEj	57648	2	4223	1	2605	0	2654	0	1441	0	2181	0	2335	0	1588	0	3181	0	6656	1	6700	0
(CAGA)n	57648	54	4223	10	2605	3	2654	0	1441	1	2181	4	2335	3	1588	2	3181	2	6656	8	6700	11
LTRIS_Mm	57648	3	4223	1	2605	1	2654	0	1441	0	2181	1	2335	0	1588	0	3181	0	6656	0	6700	0
RLTR41C	57648	4	4223	1	2605	0	2654	0	1441	0	2181	0	2335	0	1588	0	3181	0	6656	0	6700	0
(AATAG)n	57648	0	4223	0	2605	0	2654	0	1441	0	2181	0	2335	0	1588	1	3181	0	6656	0	6700	1
MLT1A	57648	32	4223	8	2605	2	2654	3	1441	1	2181	4	2335	0	1588	1	3181	0	6656	2	6700	3
MERV1_I-int	57648	16	4223	0	2605	0	2654	0	1441	0	2181	2	2335	0	1588	0	3181	2	6656	6	6700	0
L2	57648	191	4223	12	2605	4	2654	2	1441	3	2181	7	2335	6	1588	3	3181	5	6656	21	6700	16
tRNA-Asn-AAC	57648	1	4223	1	2605	0	2654	0	1441	0	2181	0	2335	0	1588	0	3181	0	6656	0	6700	0
MER92D	57648	2	4223	0	2605	0	2654	0	1441	0	2181	0	2335	0	1588	0	3181	0	6656	0	6700	0
MER63B	57648	6	4223	1	2605	0	2654	0	1441	0	2181	0	2335	0	1588	0	3181	0	6656	1	6700	0
MLT1H1	57648	5	4223	0	2605	0	2654	0	1441	1	2181	1	2335	0	1588	1	3181	0	6656	0	6700	0
MLTR14	57648	91	4223	7	2605	4	2654	1	1441	2	2181	6	2335	2	1588	0	3181	3	6656	15	6700	1
ERVB2_1-I_MM-int	57648	1	4223	0	2605	0	2654	0	1441	0	2181	0	2335	0	1588	0	3181	0	6656	0	6700	0
RMER17C	57648	49	4223	3	2605	0	2654	3	1441	1	2181	0	2335	0	1588	3	3181	0	6656	6	6700	9
(TCCG)n	57648	1	4223	0	2605	0	2654	0	1441	0	2181	0	2335	0	1588	0	3181	1	6656	0	6700	1
(TA)n	57648	269	4223	33	2605	7	2654	25	1441	5	2181	6	2335	0	1588	4	3181	5	6656	34	6700	19
(CAGCC)n	57648	3	4223	0	2605	0	2654	0	1441	0	2181	0	2335	0	1588	0	3181	1	6656	0	6700	1
(CACGC)n	57648	1	4223	0	2605	0	2654	1	1441	0	2181	0	2335	0	1588	0	3181	0	6656	0	6700	0
RLTR1B	57648	55	4223	1	2605	0	2654	0	1441	0	2181	3	2335	0	1588	0	3181	1	6656	8	6700	0
LTR102_Mam	57648	2	4223	0	2605	0	2654	0	1441	0	2181	0	2335	0	1588	0	3181	0	6656	1	6700	0
HAL1b	57648	7	4223	1	2605	0	2654	0	1441	0	2181	0	2335	0	1588	0	3181	0	6656	1	6700	0
(TGGA)n	57648	22	4223	0	2605	1	2654	2	1441	1	2181	2	2335	0	1588	0	3181	2	6656	5	6700	0
RLTR13D6	57648	116	4223	0	2605	1	2654	1	1441	1	2181	2	2335	0	1588	0	3181	3	6656	13	6700	0
MTB	57648	67	4223	2	2605	4	2654	3	1441	0	2181	6	2335	1	1588	0	3181	2	6656	4	6700	3
(TAGG)n	57648	3	4223	0	2605	0	2654	0	1441	0	2181	1	2335	0	1588	0	3181	0	6656	2	6700	1
Tigger20a	57648	0	4223	0	2605	0	2654	0	1441	2	2181	0	2335	1	1588	0	3181	0	6656	0	6700	0
U4	57648	1	4223	1	2605	0	2654	0	1441	0	2181	0	2335	0	1588	0	3181	0	6656	0	6700	1
MER103C	57648	7	4223	0	2605	1	2654	0	1441	0	2181	2	2335	0	1588	2	3181	0	6656	2	6700	0
RLTR17C_Mm	57648	1	4223	1	2605	0	2654	0	1441	0	2181	0	2335	0	1588	0	3181	0	6656	0	6700	0
RMER4B	57648	85	4223	9	2605	2	2654	1	1441	1	2181	3	2335	0	1588	1	3181	1	6656	9	6700	12
MIR3	57648	191	4223	13	2605	11	2654	6	1441	12	2181	6	2335	6	1588	9	3181	10	6656	12	6700	25
MER70A	57648	1	4223	0	2605	0	2654	0	1441	0	2181	0	2335	0	1588	0	3181	0	6656	0	6700	0
LTR81A	57648	1	4223	0	2605	0	2654	0	1441	0	2181	0	2335	0	1588	0	3181	0	6656	0	6700	0
tRNA-Gln-CAA	57648	0	4223	0	2605	0	2654	0	1441	0	2181	0	2335	0	1588	0	3181	0	6656	0	6700	1
IAPEY4_I-int	57648	6	4223	2	2605	3	2654	3	1441	0	2181	2	2335	0	1588	1	3181	4	6656	3	6700	0
MLT2F	57648	6	4223	0	2605	0	2654	1	1441	0	2181	0	2335	0	1588	0	3181	1	6656	0	6700	0
MLTR11A	57648	19	4223	1	2605	0	2654	1	1441	0	2181	2	2335	0	1588	0	3181	0	6656	1	6700	1
L1M3de	57648	4	4223	1	2605	0	2654	0	1441	0	2181	0	2335	0	1588	0	3181	0	6656	1	6700	0
RLTR19A	57648	2	4223	0	2605	0	2654	0	1441	0	2181	0	2335	0	1588	0	3181	0	6656	0	6700	0
LTR31	57648	0	4223	1	2605	1	2654	0	1441	0	2181	0	2335	0	1588	0	3181	0	6656	0	6700	0
MER21C	57648	28	4223	3	2605	0	2654	0	1441	0	2181	0	2335	0	1588	0	3181	1	6656	5	6700	2
ERVB4_1C-LTR_Mm	57648	2	4223	1	2605	0	2654	0	1441	0	2181	0	2335	0	1588	0	3181	0	6656	2	6700	0
MamGypLTR3a	57648	2	4223	1	2605	0	2654	0	1441	0	2181	2	2335	0	1588	1	3181	1	6656	2	6700	1
LTR84b	57648	1	4223	0	2605	0	2654	0	1441	0	2181	0	2335	0	1588	0	3181	0	6656	0	6700	0
RLTR13C2	57648	6	4223	0	2605	0	2654	0	1441	0	2181	3	2335	0	1588	0	3181	0	6656	1	6700	0
MER5A	57648	81	4223	2	2605	5	2654	5	1441	3	2181	3	2335	4	1588	7	3181	3	6656	7	6700	5
RLTR1D	57648	3	4223	0	2605	0	2654	0	1441	0	2181	0	2335	0	1588	0	3181	0	6656	1	6700	0
L1MC3	57648	53	4223	10	2605	2	2654	2	1441	0	2181	1	2335	1	1588	1	3181	1	6656	11	6700	1
MTD-int	57648	30	4223	3	2605	0	2654	0	1441	0	2181	1	2335	1	1588	0	3181	1	6656	6	6700	7
RLTR30E_MM	57648	1	4223	0	2605	0	2654	0	1441	0	2181	0	2335	0	1588	0	3181	0	6656	0	6700	0
RLTR17B_Mm	57648	158	4223	18	2605	4	2654	11	1441	1	2181	6	2335	3	1588	6	3181	2	6656	14	6700	13
LTR83	57648	1	4223	0	2605	1	2654	0	1441	0	2181	0	2335	0	1588	0	3181	1	6656	0	6700	0
MTB_Mm-int	57648	4	4223	0	2605	0	2654	0	1441	0	2181	0	2335	0	1588	0	3181	0	6656	0	6700	1
MER33	57648	34	4223	0	2605	1	2654	1	1441	0	2181	0	2335	2	1588	2	3181	0	6656	3	6700	2
L1M6	57648	3	4223	0	2605	0	2654	0	1441	0	2181	0	2335	0	1588	0	3181	1	6656	0	6700	0
(AACTG)n	57648	2	4223	0	2605	0	2654	0	1441	0	2181	0	2335	0	1588	0	3181	0	6656	0	6700	0
HERV16-int	57648	4	4223	1	2605	0	2654	0	1441	0	2181	0	2335	0	1588	0	3181	0	6656	0	6700	0
IMPB_01	57648	158	4223	13	2605	2	2654	12	1441	5	2181	4	2335	7	1588	3	3181	6	6656	19	6700	14
(GCGTG)n	57648	3	4223	0	2605	0	2654	0	1441	0	2181	0	2335	0	1588	0	3181	0	6656	0	6700	0
(TAGA)n	57648	91	4223	9	2605	3	2654	4	1441	1	2181	3	2335	1	1588	1	3181	2	6656	12	6700	2
MLTR32C_MM	57648	1	4223	0	2605	0	2654	0	1441	0	2181	0	2335	0	1588	0	3181	0	6656	1	6700	0
MLT1M	57648	3	4223	0	2605	0	2654	0	1441	0	2181	0	2335	0	1588	0	3181	0	6656	0	6700	0
Tigger12	57648	2	4223	1	2605	0	2654	0	1441	0	2181	0	2335	0	1588	0	3181	0	6656	0	6700	0
RMER3D-int	57648	14	4223	0	2605	0	2654	0	1441	0	2181	1	2335	1	1588	0	3181	0	6656	2	6700	2
MER67D	57648	1	4223	0	2605	0	2654	0	1441	0	2181	1	2335	0	1588	0	3181	0	6656	1	6700	0
RLTR10C	57648	18	4223	6	2605	0	2654	1	1441	0	2181	1	2335	0	1588	0	3181	0	6656	2	6700	0
IAPLTR1a_Mm	57648	129	4223	7	2605	0	2654	4	1441	0	2181	6	2335	1	1588	0	3181	1	6656	25	6700	0
L1ME3B	57648	6	4223	1	2605	0	2654	0	1441	0	2181	0	2335	0	1588	0	3181	0	6656	1	6700	0
(CAGGG)n	57648	9	4223	0	2605	0	2654	0	1441	0	2181	0	2335	0	1588	0	3181	1	6656	1	6700	2
RMER16A3	57648	2	4223	1	2605	1	2654	0	1441	0	2181	0	2335	0	1588	0	3181	0	6656	0	6700	0
L1MCa	57648	35	4223	7	2605	1	2654	5	1441	0	2181	3	2335	0	1588	0	3181	1	6656	5	6700	1
RLTR48A	57648	6	4223	0	2605	0	2654	0	1441	0	2181	0	2335	0	1588	0	3181	0	6656	0	6700	1
MER110A	57648	0	4223	0	2605	0	2654	0	1441	0	2181	0	2335	0	1588	0	3181	1	6656	0	6700	0
MurSatRep1	57648	13	4223	4	2605	0	2654	0	1441	0	2181	0	2335	0	1588	0	3181	0	6656	1	6700	1
L1M6B	57648	0	4223	0	2605	1	2654	0	1441	0	2181	0	2335	0	1588	0	3181	0	6656	1	6700	0
LTR78	57648	8	4223	0	2605	0	2654	1	1441	0	2181	0	2335	0	1588	0	3181	1	6656	2	6700	0
MLT1A0	57648	92	4223	2	2605	4	2654	5	1441	2	2181	10	2335	1	1588	1	3181	4	6656	14	6700	4
(TCTCC)n	57648	9	4223	0	2605	1	2654	0	1441	0	2181	0	2335	1	1588	0	3181	0	6656	0	6700	0
MER74B	57648	8	4223	1	2605	0	2654	0	1441	0	2181	0	2335	0	1588	0	3181	0	6656	0	6700	0
MER91A	57648	7	4223	0	2605	0	2654	0	1441	0	2181	0	2335	1	1588	0	3181	0	6656	2	6700	0
BGLII_B2	57648	2	4223	0	2605	0	2654	0	1441	0	2181	0	2335	0	1588	0	3181	0	6656	1	6700	0
Kanga1d	57648	1	4223	1	2605	0	2654	0	1441	0	2181	0	2335	0	1588	0	3181	0	6656	0	6700	0
RLTR40	57648	22	4223	2	2605	0	2654	0	1441	1	2181	0	2335	0	1588	0	3181	0	6656	6	6700	1
MMERVK10D3_LTR	57648	5	4223	0	2605	0	2654	0	1441	0	2181	0	2335	0	1588	0	3181	0	6656	1	6700	0
(CAAAA)n	57648	198	4223	22	2605	5	2654	9	1441	5	2181	13	2335	2	1588	7	3181	7	6656	22	6700	28
MLT1D-int	57648	2	4223	0	2605	1	2654	1	1441	0	2181	0	2335	0	1588	0	3181	0	6656	0	6700	0
Tigger1a_Art	57648	1	4223	0	2605	0	2654	0	1441	0	2181	0	2335	0	1588	0	3181	0	6656	0	6700	0
RLTR20A4	57648	67	4223	8	2605	0	2654	3	1441	1	2181	2	2335	3	1588	3	3181	4	6656	3	6700	7
ID4	57648	300	4223	18	2605	3	2654	10	1441	6	2181	11	2335	3	1588	3	3181	6	6656	11	6700	42
Tigger10	57648	3	4223	0	2605	0	2654	1	1441	0	2181	0	2335	0	1588	0	3181	0	6656	0	6700	0
(CAGGC)n	57648	4	4223	0	2605	0	2654	0	1441	0	2181	0	2335	0	1588	0	3181	0	6656	0	6700	0
RMER6C	57648	30	4223	2	2605	2	2654	3	1441	0	2181	4	2335	0	1588	0	3181	1	6656	6	6700	1
MLTR18B_MM	57648	6	4223	0	2605	0	2654	0	1441	0	2181	0	2335	0	1588	0	3181	0	6656	0	6700	0
MLT1G3	57648	14	4223	0	2605	0	2654	0	1441	0	2181	0	2335	0	1588	0	3181	0	6656	0	6700	3
L1MD	57648	70	4223	8	2605	1	2654	7	1441	0	2181	2	2335	0	1588	0	3181	2	6656	6	6700	5
L1MA5A	57648	9	4223	0	2605	0	2654	0	1441	0	2181	1	2335	0	1588	0	3181	1	6656	2	6700	1
Eulor11	57648	1	4223	0	2605	0	2654	0	1441	0	2181	0	2335	0	1588	0	3181	0	6656	0	6700	0
RMER6-int	57648	3	4223	0	2605	0	2654	0	1441	0	2181	0	2335	0	1588	0	3181	0	6656	0	6700	0
RLTR9D	57648	3	4223	1	2605	0	2654	0	1441	0	2181	1	2335	0	1588	0	3181	0	6656	0	6700	0
B1_Mur4	57648	789	4223	90	2605	10	2654	15	1441	10	2181	12	2335	18	1588	13	3181	10	6656	29	6700	116
L1ME4b	57648	20	4223	1	2605	0	2654	0	1441	0	2181	0	2335	0	1588	0	3181	0	6656	3	6700	4
MLT2B5	57648	4	4223	0	2605	0	2654	0	1441	0	2181	0	2335	0	1588	0	3181	0	6656	0	6700	0
Chap1_Mam	57648	1	4223	0	2605	0	2654	0	1441	0	2181	0	2335	0	1588	0	3181	0	6656	0	6700	0
(GGGTG)n	57648	18	4223	2	2605	0	2654	1	1441	1	2181	0	2335	1	1588	5	3181	3	6656	2	6700	4
Charlie15b	57648	1	4223	0	2605	0	2654	0	1441	0	2181	0	2335	0	1588	0	3181	0	6656	0	6700	1
ERV3-16A3_LTR	57648	1	4223	0	2605	0	2654	0	1441	0	2181	0	2335	1	1588	0	3181	0	6656	0	6700	0
(CACCAT)n	57648	8	4223	3	2605	0	2654	0	1441	0	2181	0	2335	1	1588	0	3181	0	6656	0	6700	1
RLTR13F	57648	1	4223	0	2605	0	2654	0	1441	0	2181	0	2335	0	1588	0	3181	0	6656	0	6700	0
tRNA-Arg-AGG	57648	1	4223	0	2605	0	2654	0	1441	0	2181	0	2335	0	1588	0	3181	0	6656	0	6700	0
L1ME4a	57648	15	4223	2	2605	0	2654	0	1441	0	2181	0	2335	0	1588	1	3181	1	6656	3	6700	3
(ACATG)n	57648	1	4223	0	2605	0	2654	0	1441	0	2181	0	2335	0	1588	0	3181	0	6656	0	6700	0
(CATATA)n	57648	26	4223	3	2605	1	2654	7	1441	0	2181	1	2335	0	1588	0	3181	5	6656	4	6700	5
RLTR35B_MM	57648	5	4223	0	2605	0	2654	0	1441	0	2181	0	2335	0	1588	0	3181	0	6656	0	6700	0
(CATTC)n	57648	1	4223	0	2605	0	2654	3	1441	0	2181	0	2335	0	1588	0	3181	0	6656	0	6700	0
ORR1A2-int	57648	14	4223	4	2605	0	2654	0	1441	0	2181	0	2335	0	1588	0	3181	1	6656	3	6700	1
SRV_MM-int	57648	0	4223	1	2605	0	2654	0	1441	0	2181	1	2335	0	1588	0	3181	0	6656	2	6700	0
IAP1-MM_I-int	57648	32	4223	1	2605	2	2654	0	1441	0	2181	0	2335	0	1588	0	3181	0	6656	9	6700	0
Eulor6D	57648	0	4223	0	2605	0	2654	0	1441	0	2181	0	2335	1	1588	0	3181	0	6656	0	6700	0
RLTR10F	57648	4	4223	0	2605	0	2654	0	1441	0	2181	0	2335	0	1588	0	3181	0	6656	1	6700	0
B2_Mm2	57648	11840	4223	664	2605	87	2654	202	1441	121	2181	243	2335	157	1588	47	3181	104	6656	687	6700	1407
MuRRS4-int	57648	25	4223	2	2605	0	2654	3	1441	0	2181	7	2335	0	1588	0	3181	1	6656	6	6700	0
RSINE1	57648	1519	4223	153	2605	25	2654	51	1441	29	2181	29	2335	36	1588	30	3181	23	6656	83	6700	180
RLTR6_Mm	57648	11	4223	2	2605	0	2654	0	1441	0	2181	0	2335	0	1588	0	3181	0	6656	1	6700	0
ZP3AR	57648	50	4223	3	2605	1	2654	2	1441	0	2181	0	2335	3	1588	0	3181	1	6656	0	6700	8
RLTR44-int	57648	1	4223	0	2605	0	2654	0	1441	0	2181	0	2335	0	1588	0	3181	0	6656	0	6700	0
(CGGGG)n	57648	53	4223	0	2605	4	2654	0	1441	0	2181	0	2335	4	1588	0	3181	22	6656	0	6700	15
RLTR9A3B	57648	4	4223	0	2605	0	2654	0	1441	0	2181	0	2335	0	1588	0	3181	0	6656	1	6700	1
RLTR13B4	57648	3	4223	0	2605	0	2654	0	1441	0	2181	0	2335	0	1588	0	3181	0	6656	2	6700	0
MLTR18C_MM	57648	8	4223	0	2605	0	2654	0	1441	0	2181	0	2335	1	1588	0	3181	0	6656	1	6700	0
MER2B	57648	16	4223	0	2605	0	2654	1	1441	0	2181	0	2335	0	1588	0	3181	0	6656	1	6700	0
L1Md_Gf	57648	3	4223	0	2605	0	2654	1	1441	0	2181	0	2335	0	1588	0	3181	0	6656	2	6700	0
MERVL-int	57648	16	4223	0	2605	0	2654	0	1441	0	2181	0	2335	0	1588	0	3181	0	6656	3	6700	1
MamGyp-int	57648	0	4223	0	2605	1	2654	0	1441	0	2181	0	2335	0	1588	0	3181	0	6656	0	6700	0
L3	57648	91	4223	1	2605	9	2654	3	1441	3	2181	2	2335	2	1588	4	3181	3	6656	14	6700	8
(A)n	57648	389	4223	31	2605	17	2654	4	1441	8	2181	13	2335	8	1588	14	3181	12	6656	15	6700	34
MLT1J-int	57648	4	4223	0	2605	1	2654	0	1441	0	2181	0	2335	0	1588	0	3181	0	6656	2	6700	0
RLTR10	57648	23	4223	2	2605	0	2654	0	1441	0	2181	0	2335	1	1588	1	3181	2	6656	0	6700	0
(ATAAG)n	57648	1	4223	0	2605	0	2654	0	1441	0	2181	0	2335	0	1588	0	3181	0	6656	0	6700	0
RLTR16	57648	18	4223	2	2605	0	2654	1	1441	1	2181	1	2335	1	1588	0	3181	0	6656	1	6700	0
MER44B	57648	22	4223	0	2605	0	2654	1	1441	1	2181	2	2335	1	1588	1	3181	1	6656	3	6700	1
RLTR9A2	57648	1	4223	1	2605	0	2654	0	1441	0	2181	1	2335	0	1588	0	3181	0	6656	0	6700	0
G-rich	57648	244	4223	16	2605	21	2654	14	1441	7	2181	7	2335	21	1588	4	3181	74	6656	9	6700	44
RLTR19	57648	11	4223	2	2605	0	2654	0	1441	1	2181	1	2335	2	1588	0	3181	1	6656	1	6700	1
RLTR9F	57648	1	4223	0	2605	0	2654	0	1441	0	2181	0	2335	0	1588	0	3181	0	6656	0	6700	0
MER105	57648	3	4223	0	2605	0	2654	0	1441	0	2181	0	2335	0	1588	0	3181	0	6656	0	6700	0
LTR81C	57648	0	4223	0	2605	0	2654	0	1441	0	2181	0	2335	0	1588	0	3181	0	6656	1	6700	0
L1MEf	57648	30	4223	4	2605	2	2654	4	1441	0	2181	0	2335	1	1588	0	3181	0	6656	6	6700	7
MLT1F1	57648	16	4223	1	2605	0	2654	1	1441	0	2181	1	2335	0	1588	1	3181	0	6656	1	6700	1
MURVY-int	57648	4	4223	1	2605	0	2654	1	1441	0	2181	0	2335	0	1588	0	3181	1	6656	2	6700	0
MER97d	57648	0	4223	1	2605	0	2654	0	1441	0	2181	0	2335	0	1588	0	3181	1	6656	0	6700	0
RLTR11A2	57648	30	4223	1	2605	1	2654	0	1441	0	2181	1	2335	1	1588	2	3181	1	6656	1	6700	1
RLTR13B3	57648	3	4223	0	2605	0	2654	0	1441	0	2181	0	2335	0	1588	0	3181	0	6656	0	6700	0
LTR40A1	57648	2	4223	0	2605	0	2654	0	1441	0	2181	0	2335	0	1588	0	3181	0	6656	0	6700	0
ERVB5_1-I_MM-int	57648	10	4223	0	2605	0	2654	0	1441	0	2181	0	2335	0	1588	0	3181	0	6656	1	6700	0
MamGypLTR1d	57648	1	4223	0	2605	0	2654	0	1441	0	2181	0	2335	0	1588	0	3181	0	6656	0	6700	0
LTR23-int	57648	1	4223	0	2605	0	2654	0	1441	0	2181	0	2335	0	1588	0	3181	0	6656	0	6700	0
tRNA-Gly-GGA	57648	0	4223	0	2605	0	2654	0	1441	0	2181	0	2335	0	1588	0	3181	0	6656	1	6700	0
MER45C	57648	2	4223	0	2605	0	2654	0	1441	0	2181	1	2335	1	1588	0	3181	0	6656	0	6700	0
(TTTTG)n	57648	223	4223	22	2605	7	2654	9	1441	6	2181	11	2335	5	1588	6	3181	5	6656	25	6700	20
MER2	57648	83	4223	6	2605	5	2654	2	1441	3	2181	6	2335	2	1588	0	3181	5	6656	8	6700	11
(TTCC)n	57648	101	4223	11	2605	2	2654	2	1441	1	2181	3	2335	1	1588	3	3181	1	6656	15	6700	7
Tigger8	57648	3	4223	0	2605	0	2654	0	1441	0	2181	1	2335	0	1588	0	3181	0	6656	0	6700	0
RLTR13D	57648	3	4223	0	2605	0	2654	0	1441	0	2181	0	2335	0	1588	0	3181	0	6656	0	6700	0
RMER19B	57648	88	4223	4	2605	1	2654	3	1441	1	2181	3	2335	2	1588	0	3181	2	6656	9	6700	11
ERVL-E-int	57648	15	4223	1	2605	1	2654	0	1441	0	2181	0	2335	0	1588	1	3181	0	6656	6	6700	0
RMER20A	57648	9	4223	1	2605	0	2654	0	1441	1	2181	0	2335	1	1588	0	3181	0	6656	2	6700	2
LTR85c	57648	1	4223	0	2605	0	2654	0	1441	0	2181	0	2335	0	1588	0	3181	0	6656	0	6700	0
RMER10B	57648	34	4223	4	2605	0	2654	1	1441	1	2181	3	2335	2	1588	1	3181	0	6656	3	6700	4
LTR33B	57648	7	4223	0	2605	0	2654	0	1441	0	2181	0	2335	0	1588	0	3181	0	6656	1	6700	0
Kanga1b	57648	2	4223	0	2605	0	2654	0	1441	0	2181	0	2335	0	1588	0	3181	0	6656	0	6700	0
RLTR19C	57648	2	4223	0	2605	0	2654	0	1441	0	2181	0	2335	0	1588	0	3181	1	6656	0	6700	0
LTR33A_	57648	8	4223	0	2605	0	2654	0	1441	0	2181	0	2335	0	1588	0	3181	0	6656	4	6700	0
RMER16C	57648	1	4223	0	2605	0	2654	0	1441	0	2181	0	2335	0	1588	0	3181	0	6656	0	6700	0
ID_B1	57648	1558	4223	153	2605	19	2654	53	1441	30	2181	46	2335	58	1588	39	3181	46	6656	76	6700	232
RLTR30	57648	14	4223	0	2605	0	2654	0	1441	0	2181	0	2335	1	1588	1	3181	1	6656	2	6700	3
LTR75B	57648	1	4223	0	2605	0	2654	0	1441	0	2181	0	2335	0	1588	0	3181	0	6656	1	6700	0
RMER16-int	57648	35	4223	0	2605	1	2654	1	1441	0	2181	0	2335	0	1588	0	3181	1	6656	5	6700	0
(ATTTG)n	57648	2	4223	0	2605	0	2654	0	1441	0	2181	0	2335	0	1588	0	3181	0	6656	0	6700	0
U6	57648	22	4223	4	2605	0	2654	0	1441	0	2181	0	2335	0	1588	0	3181	0	6656	1	6700	3
MTB_Mm	57648	46	4223	0	2605	1	2654	3	1441	0	2181	3	2335	0	1588	2	3181	1	6656	4	6700	2
LTR28B	57648	5	4223	1	2605	0	2654	0	1441	0	2181	0	2335	0	1588	0	3181	0	6656	0	6700	1
Ricksha_a	57648	2	4223	0	2605	0	2654	0	1441	0	2181	0	2335	0	1588	0	3181	0	6656	0	6700	0
RLTR53_Mm	57648	9	4223	2	2605	0	2654	0	1441	0	2181	1	2335	0	1588	0	3181	0	6656	0	6700	1
(CAA)n	57648	90	4223	10	2605	2	2654	7	1441	0	2181	0	2335	3	1588	2	3181	5	6656	13	6700	6
LTR104_Mam	57648	0	4223	0	2605	0	2654	0	1441	0	2181	0	2335	0	1588	0	3181	0	6656	2	6700	0
RMER2	57648	25	4223	1	2605	0	2654	0	1441	0	2181	1	2335	0	1588	0	3181	0	6656	6	6700	2
Zaphod	57648	9	4223	0	2605	0	2654	1	1441	1	2181	0	2335	0	1588	0	3181	0	6656	2	6700	0
LTR82B	57648	3	4223	0	2605	1	2654	0	1441	0	2181	1	2335	0	1588	0	3181	0	6656	1	6700	0
RLTR20A2	57648	1	4223	0	2605	0	2654	0	1441	0	2181	0	2335	0	1588	0	3181	0	6656	0	6700	1
MamRep38	57648	5	4223	1	2605	0	2654	0	1441	0	2181	0	2335	0	1588	0	3181	0	6656	0	6700	0
MamGypLTR2c	57648	2	4223	0	2605	0	2654	0	1441	0	2181	0	2335	0	1588	0	3181	0	6656	1	6700	0
Charlie5	57648	20	4223	1	2605	2	2654	2	1441	0	2181	2	2335	0	1588	0	3181	0	6656	0	6700	1
MMERVK10D3_I-int	57648	7	4223	0	2605	0	2654	1	1441	0	2181	4	2335	0	1588	2	3181	0	6656	2	6700	0
ORSL	57648	8	4223	1	2605	1	2654	1	1441	1	2181	0	2335	0	1588	1	3181	0	6656	1	6700	0
L1MA5	57648	42	4223	3	2605	1	2654	4	1441	1	2181	0	2335	2	1588	2	3181	2	6656	7	6700	0
tRNA-Val-GTY	57648	0	4223	0	2605	1	2654	0	1441	0	2181	1	2335	0	1588	0	3181	0	6656	0	6700	0
ORSL-2a	57648	1	4223	0	2605	0	2654	0	1441	0	2181	0	2335	0	1588	0	3181	0	6656	0	6700	0
MER96	57648	0	4223	1	2605	0	2654	0	1441	0	2181	0	2335	0	1588	0	3181	0	6656	0	6700	0
RLTR20C1_MM	57648	33	4223	3	2605	1	2654	1	1441	0	2181	1	2335	2	1588	0	3181	0	6656	3	6700	3
(TTATG)n	57648	0	4223	0	2605	0	2654	0	1441	0	2181	0	2335	0	1588	0	3181	0	6656	0	6700	0
L1M1	57648	6	4223	0	2605	0	2654	1	1441	0	2181	0	2335	0	1588	0	3181	0	6656	1	6700	0
URR1B	57648	223	4223	29	2605	11	2654	15	1441	10	2181	8	2335	4	1588	9	3181	9	6656	25	6700	16
MER130	57648	1	4223	0	2605	0	2654	0	1441	0	2181	0	2335	0	1588	0	3181	0	6656	0	6700	0
L1Md_F2	57648	586	4223	17	2605	24	2654	34	1441	2	2181	35	2335	5	1588	9	3181	13	6656	229	6700	15
(TGGGGG)n	57648	30	4223	2	2605	4	2654	4	1441	1	2181	3	2335	2	1588	0	3181	5	6656	3	6700	4
RCHARR1	57648	98	4223	18	2605	1	2654	6	1441	4	2181	2	2335	1	1588	2	3181	2	6656	13	6700	12
MLT1D	57648	72	4223	7	2605	5	2654	5	1441	3	2181	5	2335	1	1588	2	3181	7	6656	13	6700	7
(CCTA)n	57648	7	4223	1	2605	0	2654	0	1441	0	2181	0	2335	0	1588	0	3181	0	6656	0	6700	1
RMER17A2	57648	16	4223	0	2605	0	2654	0	1441	0	2181	1	2335	0	1588	0	3181	0	6656	1	6700	0
MER81	57648	6	4223	0	2605	0	2654	0	1441	0	2181	1	2335	0	1588	0	3181	0	6656	1	6700	1
L1_Mus3	57648	318	4223	8	2605	22	2654	22	1441	2	2181	21	2335	2	1588	8	3181	9	6656	109	6700	5
tRNA-Cys-TGY	57648	2	4223	0	2605	0	2654	0	1441	0	2181	0	2335	0	1588	0	3181	0	6656	0	6700	0
LFSINE_Vert	57648	14	4223	0	2605	3	2654	0	1441	0	2181	1	2335	0	1588	2	3181	0	6656	3	6700	2
MER47A	57648	2	4223	0	2605	0	2654	0	1441	0	2181	0	2335	0	1588	0	3181	0	6656	1	6700	0
Lx3C	57648	47	4223	0	2605	1	2654	3	1441	1	2181	5	2335	0	1588	0	3181	0	6656	8	6700	0
LTR16D	57648	1	4223	0	2605	0	2654	0	1441	0	2181	0	2335	0	1588	0	3181	0	6656	0	6700	0
IAPLTR2_Mm	57648	153	4223	7	2605	0	2654	4	1441	1	2181	6	2335	0	1588	0	3181	1	6656	70	6700	0
(TTCG)n	57648	2	4223	0	2605	0	2654	0	1441	0	2181	0	2335	0	1588	0	3181	0	6656	0	6700	0
Tigger17	57648	3	4223	0	2605	0	2654	0	1441	0	2181	0	2335	0	1588	0	3181	0	6656	0	6700	0
Lx10	57648	62	4223	5	2605	3	2654	6	1441	0	2181	1	2335	1	1588	1	3181	2	6656	9	6700	6
(TAAG)n	57648	5	4223	1	2605	0	2654	0	1441	0	2181	0	2335	0	1588	0	3181	0	6656	0	6700	0
L1MB5	57648	53	4223	4	2605	1	2654	1	1441	1	2181	0	2335	0	1588	1	3181	4	6656	1	6700	8
BGLII_B	57648	6	4223	2	2605	0	2654	1	1441	0	2181	2	2335	0	1588	0	3181	0	6656	4	6700	1
(ATGTG)n	57648	1	4223	0	2605	0	2654	0	1441	0	2181	0	2335	0	1588	0	3181	0	6656	1	6700	0
(CATA)n	57648	93	4223	20	2605	1	2654	7	1441	0	2181	4	2335	2	1588	2	3181	2	6656	17	6700	10
MLT2D	57648	5	4223	0	2605	1	2654	1	1441	0	2181	1	2335	0	1588	0	3181	1	6656	1	6700	1
(AAATG)n	57648	1	4223	0	2605	0	2654	0	1441	0	2181	0	2335	0	1588	0	3181	0	6656	0	6700	0
MLT1F2-int	57648	0	4223	0	2605	0	2654	0	1441	0	2181	0	2335	0	1588	0	3181	0	6656	0	6700	0
ORR1A4-int	57648	16	4223	1	2605	1	2654	0	1441	1	2181	0	2335	0	1588	0	3181	1	6656	0	6700	1
(GGAGAA)n	57648	13	4223	0	2605	1	2654	0	1441	1	2181	0	2335	0	1588	0	3181	0	6656	1	6700	0
ORR1D2	57648	318	4223	35	2605	9	2654	39	1441	5	2181	47	2335	0	1588	1	3181	13	6656	120	6700	12
MamTip3	57648	1	4223	1	2605	0	2654	0	1441	0	2181	0	2335	0	1588	0	3181	0	6656	0	6700	1
(TGAA)n	57648	36	4223	1	2605	0	2654	3	1441	0	2181	0	2335	1	1588	1	3181	4	6656	3	6700	2
(CCCTG)n	57648	6	4223	0	2605	0	2654	1	1441	0	2181	0	2335	1	1588	0	3181	0	6656	0	6700	1
LTR73	57648	3	4223	0	2605	0	2654	0	1441	0	2181	0	2335	0	1588	0	3181	0	6656	0	6700	0
L1M8	57648	5	4223	0	2605	1	2654	0	1441	0	2181	0	2335	0	1588	0	3181	0	6656	0	6700	0
L1M3d	57648	0	4223	0	2605	0	2654	0	1441	0	2181	0	2335	0	1588	0	3181	0	6656	0	6700	1
L1M3a	57648	1	4223	1	2605	0	2654	0	1441	0	2181	0	2335	0	1588	0	3181	0	6656	0	6700	0
ID2	57648	65	4223	4	2605	1	2654	2	1441	1	2181	2	2335	2	1588	0	3181	0	6656	3	6700	7
L1MDb	57648	9	4223	1	2605	0	2654	1	1441	0	2181	0	2335	0	1588	0	3181	0	6656	2	6700	1
tRNA-Ala-GCG	57648	2	4223	0	2605	0	2654	0	1441	0	2181	0	2335	0	1588	0	3181	0	6656	0	6700	0
IAP1-MM_LTR	57648	1	4223	0	2605	0	2654	0	1441	0	2181	0	2335	0	1588	0	3181	0	6656	0	6700	0
RMER13B	57648	24	4223	0	2605	1	2654	1	1441	0	2181	3	2335	0	1588	0	3181	1	6656	12	6700	0
UCON4	57648	2	4223	0	2605	0	2654	0	1441	0	2181	0	2335	0	1588	0	3181	0	6656	0	6700	0
RLTR46	57648	5	4223	2	2605	0	2654	3	1441	0	2181	1	2335	0	1588	0	3181	1	6656	0	6700	0
RLTR48C	57648	3	4223	0	2605	0	2654	0	1441	0	2181	0	2335	0	1588	0	3181	0	6656	0	6700	0
B1_Mus2	57648	1352	4223	161	2605	11	2654	35	1441	21	2181	17	2335	29	1588	23	3181	17	6656	47	6700	197
FordPrefect_a	57648	2	4223	0	2605	0	2654	0	1441	0	2181	0	2335	0	1588	0	3181	0	6656	0	6700	0
MLT1H-int	57648	3	4223	0	2605	0	2654	0	1441	0	2181	0	2335	0	1588	0	3181	0	6656	2	6700	0
Charlie19a	57648	1	4223	0	2605	0	2654	1	1441	0	2181	0	2335	1	1588	0	3181	0	6656	0	6700	0
Tigger19a	57648	5	4223	0	2605	1	2654	0	1441	0	2181	0	2335	0	1588	0	3181	1	6656	0	6700	1
RMER16	57648	3	4223	1	2605	0	2654	0	1441	0	2181	0	2335	0	1588	0	3181	0	6656	0	6700	0
(GGCTG)n	57648	5	4223	0	2605	0	2654	0	1441	1	2181	0	2335	1	1588	0	3181	1	6656	0	6700	1
(CAGAA)n	57648	3	4223	1	2605	0	2654	0	1441	0	2181	0	2335	0	1588	0	3181	0	6656	0	6700	0
Tigger6b	57648	1	4223	0	2605	0	2654	0	1441	0	2181	0	2335	1	1588	0	3181	0	6656	0	6700	1
L2a	57648	234	4223	14	2605	8	2654	11	1441	6	2181	6	2335	7	1588	15	3181	9	6656	20	6700	27
MER67B	57648	4	4223	0	2605	1	2654	0	1441	0	2181	0	2335	0	1588	0	3181	1	6656	0	6700	1
RLTR25B	57648	48	4223	3	2605	1	2654	2	1441	1	2181	2	2335	0	1588	0	3181	2	6656	3	6700	7
MLT2B2	57648	11	4223	1	2605	0	2654	0	1441	0	2181	1	2335	0	1588	0	3181	1	6656	0	6700	0
MLT1A0-int	57648	2	4223	0	2605	0	2654	0	1441	0	2181	0	2335	0	1588	0	3181	0	6656	0	6700	1
(CATGT)n	57648	0	4223	0	2605	0	2654	0	1441	0	2181	0	2335	0	1588	0	3181	0	6656	0	6700	0
LTRIS2	57648	15	4223	2	2605	1	2654	1	1441	1	2181	0	2335	0	1588	0	3181	0	6656	0	6700	1
MYSERV16_I-int	57648	29	4223	0	2605	1	2654	1	1441	1	2181	0	2335	0	1588	1	3181	0	6656	2	6700	1
L5	57648	1	4223	0	2605	0	2654	0	1441	0	2181	0	2335	0	1588	0	3181	0	6656	0	6700	0
LTR65	57648	2	4223	0	2605	1	2654	0	1441	0	2181	0	2335	0	1588	0	3181	0	6656	0	6700	0
L1MA7	57648	29	4223	2	2605	0	2654	4	1441	0	2181	2	2335	1	1588	0	3181	2	6656	7	6700	1
L1MD2	57648	38	4223	5	2605	0	2654	2	1441	0	2181	2	2335	1	1588	0	3181	2	6656	4	6700	3
RLTR11C_MM	57648	10	4223	1	2605	0	2654	0	1441	0	2181	1	2335	0	1588	0	3181	0	6656	0	6700	2
UCON18	57648	0	4223	1	2605	0	2654	0	1441	0	2181	0	2335	0	1588	0	3181	0	6656	0	6700	0
(TTAGGC)n	57648	1	4223	0	2605	0	2654	0	1441	0	2181	0	2335	0	1588	0	3181	0	6656	0	6700	0
GA-rich	57648	220	4223	24	2605	6	2654	13	1441	2	2181	8	2335	7	1588	6	3181	9	6656	21	6700	33
MIR	57648	349	4223	24	2605	13	2654	11	1441	6	2181	16	2335	12	1588	15	3181	19	6656	48	6700	47
tRNA-Ala-GCA	57648	8	4223	0	2605	0	2654	0	1441	0	2181	1	2335	0	1588	0	3181	0	6656	1	6700	1
MT2C_Mm	57648	15	4223	0	2605	0	2654	0	1441	0	2181	3	2335	0	1588	0	3181	0	6656	2	6700	0
(CCCG)n	57648	6	4223	0	2605	1	2654	1	1441	0	2181	0	2335	6	1588	0	3181	8	6656	1	6700	2
MER67A	57648	3	4223	0	2605	0	2654	0	1441	0	2181	1	2335	0	1588	0	3181	0	6656	0	6700	1
(CGGGGG)n	57648	10	4223	0	2605	0	2654	0	1441	0	2181	0	2335	1	1588	0	3181	3	6656	0	6700	0
RLTR44E	57648	2	4223	0	2605	0	2654	0	1441	0	2181	0	2335	0	1588	0	3181	0	6656	1	6700	0
MER121	57648	4	4223	0	2605	0	2654	0	1441	0	2181	0	2335	0	1588	0	3181	0	6656	2	6700	1
(CAAT)n	57648	35	4223	1	2605	0	2654	0	1441	1	2181	0	2335	0	1588	2	3181	0	6656	2	6700	3
UCON29	57648	3	4223	0	2605	0	2654	1	1441	0	2181	0	2335	0	1588	0	3181	0	6656	0	6700	0
IAPEY2_LTR	57648	1	4223	1	2605	1	2654	0	1441	0	2181	0	2335	0	1588	0	3181	0	6656	0	6700	0
RMER20C_Mm	57648	16	4223	1	2605	0	2654	1	1441	0	2181	0	2335	0	1588	0	3181	0	6656	4	6700	1
(CCCA)n	57648	13	4223	0	2605	1	2654	1	1441	0	2181	0	2335	0	1588	0	3181	0	6656	0	6700	0
(CGAAA)n	57648	1	4223	0	2605	0	2654	0	1441	0	2181	0	2335	0	1588	0	3181	0	6656	0	6700	0
MER54A	57648	0	4223	0	2605	1	2654	0	1441	0	2181	0	2335	0	1588	0	3181	0	6656	0	6700	0
MLT1E3	57648	10	4223	0	2605	2	2654	1	1441	0	2181	0	2335	1	1588	0	3181	0	6656	2	6700	0
Zaphod3	57648	2	4223	2	2605	0	2654	1	1441	0	2181	0	2335	0	1588	0	3181	0	6656	1	6700	0
tRNA-Leu-TTG	57648	3	4223	0	2605	0	2654	0	1441	0	2181	0	2335	0	1588	0	3181	0	6656	0	6700	0
L1M4b	57648	34	4223	2	2605	0	2654	4	1441	0	2181	0	2335	1	1588	0	3181	3	6656	2	6700	2
hAT-N1_Mam	57648	2	4223	0	2605	0	2654	0	1441	0	2181	0	2335	0	1588	0	3181	0	6656	0	6700	1
RLTR13B1	57648	7	4223	1	2605	0	2654	0	1441	0	2181	0	2335	0	1588	0	3181	0	6656	1	6700	0
(AGTAG)n	57648	0	4223	0	2605	0	2654	0	1441	0	2181	0	2335	0	1588	0	3181	1	6656	0	6700	0
IAPEy-int	57648	3	4223	0	2605	0	2654	0	1441	0	2181	1	2335	0	1588	0	3181	1	6656	0	6700	0
ORR1A0-int	57648	1	4223	0	2605	0	2654	0	1441	0	2181	0	2335	0	1588	0	3181	0	6656	1	6700	0
(CACAT)n	57648	0	4223	1	2605	0	2654	0	1441	0	2181	0	2335	0	1588	0	3181	0	6656	0	6700	0
YREP_Mm	57648	32	4223	6	2605	0	2654	1	1441	0	2181	0	2335	3	1588	0	3181	1	6656	2	6700	8
ORR1A2	57648	148	4223	9	2605	1	2654	4	1441	1	2181	7	2335	2	1588	2	3181	2	6656	14	6700	8
L1Md_F3	57648	135	4223	8	2605	5	2654	8	1441	0	2181	26	2335	3	1588	2	3181	4	6656	54	6700	6
MER68	57648	10	4223	0	2605	1	2654	0	1441	0	2181	0	2335	0	1588	0	3181	0	6656	2	6700	0
MER31B	57648	4	4223	1	2605	1	2654	0	1441	0	2181	0	2335	0	1588	0	3181	0	6656	0	6700	0
(CACAC)n	57648	1	4223	0	2605	0	2654	0	1441	1	2181	0	2335	0	1588	0	3181	0	6656	0	6700	1
(GGATG)n	57648	0	4223	1	2605	0	2654	0	1441	0	2181	1	2335	0	1588	0	3181	0	6656	0	6700	0
(AGGGGG)n	57648	5	4223	0	2605	0	2654	2	1441	1	2181	1	2335	0	1588	0	3181	2	6656	2	6700	0
X7A_LINE	57648	2	4223	0	2605	0	2654	0	1441	0	2181	0	2335	0	1588	0	3181	0	6656	0	6700	0
L1MEa	57648	0	4223	1	2605	0	2654	0	1441	0	2181	0	2335	1	1588	0	3181	0	6656	0	6700	1
(T)n	57648	392	4223	32	2605	19	2654	10	1441	5	2181	12	2335	11	1588	10	3181	10	6656	19	6700	43
MER50-int	57648	2	4223	0	2605	0	2654	0	1441	0	2181	0	2335	0	1588	0	3181	0	6656	0	6700	0
RLTR12C	57648	3	4223	0	2605	0	2654	0	1441	0	2181	0	2335	0	1588	0	3181	0	6656	0	6700	0
L1_Mus1	57648	336	4223	8	2605	8	2654	15	1441	2	2181	19	2335	3	1588	6	3181	4	6656	104	6700	7
(CCA)n	57648	34	4223	2	2605	2	2654	3	1441	2	2181	0	2335	3	1588	2	3181	4	6656	4	6700	3
(G)n	57648	32	4223	1	2605	3	2654	3	1441	1	2181	0	2335	1	1588	1	3181	1	6656	0	6700	3
MLT1N2	57648	6	4223	0	2605	0	2654	1	1441	0	2181	1	2335	0	1588	0	3181	0	6656	0	6700	0
nhAT5a_ML	57648	1	4223	0	2605	0	2654	0	1441	0	2181	0	2335	0	1588	0	3181	0	6656	0	6700	0
MLT2E	57648	2	4223	0	2605	0	2654	0	1441	0	2181	0	2335	0	1588	0	3181	0	6656	0	6700	0
ORR1D-int	57648	3	4223	0	2605	0	2654	0	1441	0	2181	0	2335	0	1588	0	3181	0	6656	1	6700	0
(CAGTT)n	57648	2	4223	0	2605	0	2654	0	1441	0	2181	0	2335	0	1588	0	3181	0	6656	0	6700	0
RLTR12E	57648	9	4223	0	2605	0	2654	1	1441	0	2181	0	2335	0	1588	0	3181	1	6656	2	6700	1
LTR108a_Mam	57648	1	4223	0	2605	0	2654	1	1441	0	2181	0	2335	0	1588	0	3181	0	6656	0	6700	0
CYRA11_Mm	57648	13	4223	0	2605	0	2654	2	1441	2	2181	0	2335	1	1588	0	3181	0	6656	1	6700	2
(CAGAGA)n	57648	28	4223	1	2605	4	2654	1	1441	0	2181	2	2335	0	1588	0	3181	4	6656	6	6700	2
(TTTCC)n	57648	18	4223	0	2605	3	2654	2	1441	0	2181	1	2335	1	1588	0	3181	0	6656	1	6700	2
LTR53	57648	0	4223	0	2605	0	2654	0	1441	0	2181	0	2335	1	1588	0	3181	0	6656	0	6700	0
RLTR44C	57648	1	4223	0	2605	0	2654	0	1441	0	2181	0	2335	0	1588	0	3181	0	6656	0	6700	0
RLTR11A	57648	27	4223	2	2605	1	2654	5	1441	0	2181	2	2335	0	1588	0	3181	1	6656	4	6700	1
RLTR13D1	57648	14	4223	0	2605	0	2654	0	1441	0	2181	0	2335	1	1588	0	3181	0	6656	1	6700	0
Helitron3Na_Mam	57648	0	4223	0	2605	0	2654	0	1441	0	2181	1	2335	0	1588	0	3181	0	6656	0	6700	0
(CAG)n	57648	38	4223	1	2605	2	2654	2	1441	2	2181	0	2335	5	1588	0	3181	19	6656	3	6700	8
ORR1C2-int	57648	9	4223	0	2605	1	2654	0	1441	0	2181	0	2335	0	1588	0	3181	0	6656	0	6700	0
ORR1A1	57648	29	4223	0	2605	0	2654	1	1441	0	2181	1	2335	0	1588	0	3181	2	6656	6	6700	1
(CCGGG)n	57648	3	4223	0	2605	1	2654	0	1441	2	2181	0	2335	0	1588	0	3181	4	6656	0	6700	4
L1_Mur1	57648	47	4223	0	2605	2	2654	4	1441	0	2181	1	2335	0	1588	0	3181	0	6656	11	6700	1
Charlie10b	57648	1	4223	0	2605	0	2654	0	1441	0	2181	0	2335	0	1588	0	3181	0	6656	0	6700	0
LTR88b	57648	1	4223	0	2605	0	2654	0	1441	0	2181	0	2335	0	1588	0	3181	1	6656	1	6700	0
HAL1M8	57648	14	4223	2	2605	1	2654	1	1441	0	2181	0	2335	0	1588	0	3181	0	6656	1	6700	5
tRNA-Met-i	57648	1	4223	0	2605	0	2654	0	1441	0	2181	0	2335	0	1588	0	3181	0	6656	0	6700	0
MERV1_LTR	57648	3	4223	0	2605	0	2654	0	1441	0	2181	0	2335	0	1588	0	3181	0	6656	1	6700	1
Tigger16b	57648	2	4223	0	2605	0	2654	0	1441	0	2181	1	2335	0	1588	0	3181	0	6656	0	6700	0
RMER17C-int	57648	20	4223	0	2605	0	2654	0	1441	1	2181	0	2335	0	1588	0	3181	2	6656	10	6700	2
RLTR31_Mur	57648	5	4223	0	2605	0	2654	0	1441	0	2181	2	2335	0	1588	0	3181	0	6656	1	6700	0
MLT1J1-int	57648	1	4223	0	2605	0	2654	0	1441	0	2181	0	2335	0	1588	1	3181	0	6656	0	6700	0
RLTR16B_MM	57648	4	4223	0	2605	1	2654	0	1441	0	2181	1	2335	0	1588	0	3181	0	6656	1	6700	0
MTE-int	57648	50	4223	5	2605	0	2654	3	1441	2	2181	4	2335	0	1588	1	3181	3	6656	7	6700	5
L1VL1	57648	10	4223	1	2605	0	2654	1	1441	0	2181	0	2335	0	1588	0	3181	0	6656	2	6700	0
RMER6BA	57648	7	4223	1	2605	1	2654	0	1441	0	2181	1	2335	1	1588	0	3181	1	6656	1	6700	0
MamGypLTR3	57648	7	4223	0	2605	3	2654	2	1441	1	2181	4	2335	0	1588	1	3181	1	6656	0	6700	1
RLTR50A	57648	0	4223	0	2605	0	2654	0	1441	0	2181	0	2335	0	1588	0	3181	0	6656	0	6700	0
RLTR22_Mur	57648	23	4223	0	2605	0	2654	0	1441	0	2181	0	2335	0	1588	0	3181	1	6656	2	6700	0
MER57C2	57648	7	4223	0	2605	0	2654	0	1441	0	2181	1	2335	0	1588	0	3181	0	6656	1	6700	0
L1_Mus2	57648	153	4223	3	2605	5	2654	10	1441	1	2181	12	2335	0	1588	6	3181	4	6656	44	6700	5
LTR80B	57648	1	4223	0	2605	0	2654	0	1441	0	2181	0	2335	0	1588	0	3181	0	6656	1	6700	0
(CAGAC)n	57648	0	4223	0	2605	0	2654	0	1441	0	2181	0	2335	0	1588	0	3181	1	6656	0	6700	0
(CACCT)n	57648	0	4223	0	2605	0	2654	0	1441	0	2181	0	2335	0	1588	0	3181	1	6656	0	6700	0
(CGGA)n	57648	4	4223	0	2605	0	2654	0	1441	0	2181	0	2335	1	1588	0	3181	0	6656	0	6700	0
Tigger1	57648	12	4223	1	2605	0	2654	3	1441	0	2181	1	2335	0	1588	1	3181	0	6656	2	6700	0
MTEa-int	57648	10	4223	1	2605	1	2654	2	1441	1	2181	0	2335	0	1588	0	3181	2	6656	1	6700	0
LTR85a	57648	1	4223	0	2605	0	2654	0	1441	0	2181	0	2335	0	1588	0	3181	0	6656	0	6700	0
tRNA-Arg-AGA	57648	0	4223	1	2605	0	2654	0	1441	0	2181	0	2335	0	1588	0	3181	2	6656	2	6700	0
RLTR19D	57648	1	4223	0	2605	0	2654	0	1441	0	2181	0	2335	0	1588	0	3181	1	6656	0	6700	0
MER76-int	57648	0	4223	0	2605	0	2654	0	1441	0	2181	0	2335	0	1588	0	3181	0	6656	0	6700	0
RLTR47	57648	2	4223	0	2605	0	2654	0	1441	0	2181	0	2335	0	1588	0	3181	0	6656	0	6700	0
RMER16B3	57648	1	4223	1	2605	0	2654	0	1441	0	2181	1	2335	0	1588	0	3181	0	6656	0	6700	1
(CAAA)n	57648	279	4223	34	2605	12	2654	9	1441	7	2181	9	2335	6	1588	10	3181	10	6656	31	6700	31
(CTTA)n	57648	4	4223	0	2605	1	2654	0	1441	0	2181	0	2335	0	1588	0	3181	0	6656	0	6700	0
RMER20B	57648	17	4223	1	2605	0	2654	0	1441	0	2181	0	2335	0	1588	0	3181	2	6656	4	6700	0
B4A	57648	1039	4223	113	2605	16	2654	65	1441	24	2181	32	2335	21	1588	18	3181	42	6656	87	6700	125
(TAAA)n	57648	611	4223	30	2605	7	2654	13	1441	3	2181	15	2335	8	1588	3	3181	5	6656	37	6700	57
B1F1	57648	245	4223	30	2605	2	2654	8	1441	4	2181	8	2335	7	1588	6	3181	7	6656	10	6700	35
HAL1ME	57648	8	4223	0	2605	0	2654	1	1441	0	2181	0	2335	0	1588	0	3181	0	6656	1	6700	1
ERVB4_3-LTR_MM	57648	1	4223	0	2605	0	2654	0	1441	0	2181	0	2335	0	1588	0	3181	0	6656	0	6700	0
(CACG)n	57648	19	4223	2	2605	3	2654	3	1441	0	2181	0	2335	0	1588	0	3181	1	6656	1	6700	0
MER113	57648	7	4223	1	2605	0	2654	0	1441	0	2181	0	2335	0	1588	0	3181	0	6656	1	6700	0
LTR86A1	57648	0	4223	0	2605	0	2654	0	1441	0	2181	0	2335	0	1588	0	3181	0	6656	1	6700	0
(TTCTCC)n	57648	4	4223	1	2605	0	2654	1	1441	0	2181	2	2335	0	1588	0	3181	0	6656	0	6700	1
LTR9D	57648	0	4223	0	2605	0	2654	0	1441	0	2181	0	2335	0	1588	0	3181	0	6656	1	6700	0
Eulor9C	57648	1	4223	0	2605	0	2654	0	1441	0	2181	0	2335	0	1588	0	3181	0	6656	0	6700	0
LTRIS_Mus	57648	13	4223	0	2605	0	2654	0	1441	0	2181	2	2335	0	1588	0	3181	0	6656	3	6700	1
Charlie6	57648	0	4223	0	2605	0	2654	0	1441	0	2181	0	2335	0	1588	0	3181	0	6656	0	6700	0
MER74A	57648	10	4223	1	2605	0	2654	0	1441	0	2181	0	2335	0	1588	0	3181	0	6656	0	6700	0
MLT2C2	57648	2	4223	0	2605	0	2654	0	1441	0	2181	0	2335	0	1588	0	3181	0	6656	0	6700	0
L1ME3F	57648	3	4223	0	2605	0	2654	0	1441	0	2181	0	2335	0	1588	0	3181	0	6656	0	6700	1
Tigger17a	57648	5	4223	1	2605	0	2654	0	1441	0	2181	0	2335	1	1588	0	3181	0	6656	1	6700	2
Lx2A1	57648	18	4223	0	2605	2	2654	2	1441	0	2181	1	2335	0	1588	0	3181	0	6656	8	6700	1
MER65-int	57648	1	4223	1	2605	0	2654	0	1441	0	2181	0	2335	0	1588	0	3181	0	6656	0	6700	0
MLT1H	57648	19	4223	0	2605	2	2654	1	1441	1	2181	2	2335	2	1588	1	3181	1	6656	2	6700	1
AT_rich	57648	2021	4223	224	2605	71	2654	122	1441	30	2181	80	2335	50	1588	51	3181	49	6656	226	6700	176
LTR45	57648	0	4223	0	2605	0	2654	0	1441	0	2181	1	2335	0	1588	0	3181	0	6656	0	6700	0
MLT1B-int	57648	1	4223	0	2605	0	2654	1	1441	0	2181	0	2335	0	1588	0	3181	0	6656	0	6700	0
MERVL_2A-int	57648	57	4223	0	2605	2	2654	1	1441	1	2181	2	2335	0	1588	1	3181	0	6656	6	6700	1
MLT-int	57648	8	4223	2	2605	0	2654	3	1441	0	2181	0	2335	0	1588	0	3181	0	6656	3	6700	1
ORR1E	57648	486	4223	59	2605	25	2654	96	1441	5	2181	60	2335	3	1588	6	3181	28	6656	180	6700	9
B1_Mur2	57648	540	4223	73	2605	5	2654	15	1441	6	2181	13	2335	16	1588	10	3181	12	6656	24	6700	84
RLTRETN_Mm	57648	11	4223	3	2605	0	2654	0	1441	0	2181	1	2335	0	1588	0	3181	0	6656	0	6700	0
B4	57648	702	4223	84	2605	16	2654	35	1441	9	2181	20	2335	10	1588	9	3181	28	6656	56	6700	58
L1M4a1	57648	5	4223	2	2605	1	2654	0	1441	0	2181	0	2335	0	1588	0	3181	0	6656	0	6700	1
ERVB4_1B-LTR_MM	57648	3	4223	1	2605	0	2654	0	1441	0	2181	0	2335	0	1588	0	3181	0	6656	0	6700	0
RLTR42-int	57648	24	4223	2	2605	1	2654	0	1441	0	2181	1	2335	1	1588	0	3181	0	6656	1	6700	3
RLTR19A2	57648	1	4223	0	2605	0	2654	0	1441	0	2181	0	2335	0	1588	0	3181	0	6656	0	6700	0
MLT2B4	57648	15	4223	1	2605	1	2654	3	1441	0	2181	0	2335	0	1588	0	3181	1	6656	2	6700	1
C-rich	57648	263	4223	18	2605	19	2654	10	1441	12	2181	7	2335	27	1588	10	3181	74	6656	16	6700	45
Looper	57648	4	4223	0	2605	0	2654	0	1441	0	2181	0	2335	0	1588	0	3181	0	6656	0	6700	2
RLTR6-int	57648	111	4223	2	2605	1	2654	4	1441	0	2181	8	2335	0	1588	0	3181	2	6656	47	6700	1
Arthur1A	57648	1	4223	0	2605	0	2654	0	1441	0	2181	1	2335	0	1588	0	3181	0	6656	0	6700	1
(TTCA)n	57648	34	4223	5	2605	2	2654	1	1441	1	2181	2	2335	2	1588	1	3181	0	6656	6	6700	1
MER53	57648	14	4223	2	2605	0	2654	0	1441	0	2181	2	2335	2	1588	0	3181	0	6656	0	6700	2
RLTR13A2	57648	1	4223	0	2605	0	2654	0	1441	0	2181	0	2335	0	1588	0	3181	0	6656	1	6700	0
BC1_Mm	57648	80	4223	6	2605	1	2654	1	1441	0	2181	0	2335	1	1588	3	3181	2	6656	5	6700	11
MTE2a	57648	134	4223	9	2605	2	2654	21	1441	1	2181	10	2335	1	1588	0	3181	3	6656	26	6700	6
7SLRNA	57648	7	4223	1	2605	0	2654	0	1441	1	2181	0	2335	1	1588	0	3181	0	6656	0	6700	2
LTR87	57648	2	4223	0	2605	0	2654	0	1441	0	2181	0	2335	1	1588	0	3181	0	6656	0	6700	2
MamGypLTR2b	57648	1	4223	0	2605	0	2654	0	1441	0	2181	0	2335	0	1588	0	3181	0	6656	2	6700	0
LTR16B	57648	2	4223	0	2605	0	2654	0	1441	0	2181	1	2335	0	1588	0	3181	0	6656	0	6700	0
(TAA)n	57648	78	4223	8	2605	7	2654	5	1441	3	2181	6	2335	1	1588	2	3181	1	6656	8	6700	5
RLTR14-int	57648	19	4223	0	2605	0	2654	0	1441	1	2181	2	2335	0	1588	0	3181	0	6656	4	6700	1
RLTR13D3A1	57648	11	4223	1	2605	1	2654	1	1441	0	2181	0	2335	0	1588	0	3181	0	6656	1	6700	0
RLTR4_MM-int	57648	9	4223	0	2605	1	2654	0	1441	0	2181	1	2335	0	1588	2	3181	1	6656	2	6700	1
tRNA-Leu-CTA_	57648	1	4223	0	2605	0	2654	0	1441	0	2181	0	2335	0	1588	0	3181	0	6656	0	6700	0
L1ME1	57648	66	4223	6	2605	2	2654	2	1441	0	2181	1	2335	1	1588	0	3181	1	6656	6	6700	7
RMER1B	57648	163	4223	4	2605	7	2654	6	1441	5	2181	18	2335	0	1588	2	3181	8	6656	21	6700	12
MER58B	57648	35	4223	3	2605	1	2654	1	1441	1	2181	0	2335	0	1588	2	3181	3	6656	6	6700	2
(CGCGG)n	57648	6	4223	0	2605	2	2654	0	1441	1	2181	0	2335	1	1588	0	3181	11	6656	0	6700	1
MLT1B	57648	88	4223	4	2605	6	2654	6	1441	1	2181	2	2335	1	1588	0	3181	4	6656	9	6700	8
MLT1E1A	57648	13	4223	0	2605	1	2654	1	1441	0	2181	0	2335	0	1588	0	3181	1	6656	3	6700	1
MER106A	57648	3	4223	0	2605	0	2654	0	1441	0	2181	0	2335	1	1588	0	3181	0	6656	1	6700	1
RLTR12B2	57648	2	4223	0	2605	0	2654	0	1441	0	2181	0	2335	0	1588	0	3181	0	6656	0	6700	0
B1F	57648	598	4223	63	2605	9	2654	15	1441	9	2181	7	2335	17	1588	16	3181	13	6656	34	6700	81
MER131	57648	1	4223	0	2605	0	2654	0	1441	0	2181	0	2335	1	1588	1	3181	0	6656	2	6700	0
(TTTTA)n	57648	52	4223	3	2605	2	2654	4	1441	2	2181	2	2335	0	1588	4	3181	2	6656	5	6700	5
MER99	57648	2	4223	1	2605	0	2654	0	1441	0	2181	0	2335	0	1588	0	3181	0	6656	0	6700	0
RLTR10B	57648	2	4223	0	2605	0	2654	0	1441	0	2181	0	2335	0	1588	0	3181	0	6656	1	6700	0
ORR1B1-int	57648	26	4223	3	2605	0	2654	0	1441	0	2181	2	2335	1	1588	1	3181	3	6656	3	6700	2
L1VL2	57648	26	4223	1	2605	0	2654	1	1441	0	2181	0	2335	1	1588	0	3181	0	6656	1	6700	1
AmnSINE1	57648	30	4223	1	2605	0	2654	3	1441	0	2181	2	2335	2	1588	1	3181	2	6656	3	6700	1
RLTR26C_MM	57648	6	4223	0	2605	0	2654	0	1441	0	2181	0	2335	0	1588	0	3181	0	6656	0	6700	1
MTC-int	57648	52	4223	4	2605	1	2654	0	1441	2	2181	1	2335	0	1588	0	3181	2	6656	7	6700	3
RLTR9D2	57648	3	4223	0	2605	0	2654	0	1441	0	2181	0	2335	0	1588	0	3181	0	6656	0	6700	0
MER102b	57648	7	4223	2	2605	1	2654	0	1441	0	2181	0	2335	0	1588	0	3181	1	6656	0	6700	0
(TTCGGG)n	57648	0	4223	0	2605	0	2654	0	1441	0	2181	0	2335	0	1588	0	3181	1	6656	0	6700	0
RLTR44A	57648	1	4223	0	2605	0	2654	0	1441	0	2181	0	2335	0	1588	0	3181	0	6656	0	6700	0
Charlie1a	57648	40	4223	2	2605	1	2654	1	1441	0	2181	0	2335	2	1588	1	3181	1	6656	2	6700	6
MER58D	57648	2	4223	1	2605	0	2654	0	1441	0	2181	0	2335	0	1588	0	3181	0	6656	0	6700	0
L1MB1	57648	23	4223	1	2605	0	2654	4	1441	0	2181	1	2335	0	1588	1	3181	1	6656	4	6700	0
LTR68	57648	1	4223	0	2605	0	2654	0	1441	0	2181	0	2335	0	1588	0	3181	0	6656	0	6700	0
L1MCb	57648	5	4223	1	2605	0	2654	0	1441	0	2181	0	2335	1	1588	0	3181	0	6656	1	6700	0
U1	57648	6	4223	0	2605	0	2654	0	1441	0	2181	2	2335	0	1588	1	3181	1	6656	0	6700	0
(GAGAA)n	57648	13	4223	1	2605	0	2654	0	1441	1	2181	2	2335	0	1588	0	3181	0	6656	1	6700	1
RNERVK23-int	57648	2	4223	0	2605	0	2654	0	1441	1	2181	0	2335	0	1588	0	3181	0	6656	0	6700	0
tRNA-Thr-ACA	57648	1	4223	0	2605	0	2654	0	1441	0	2181	0	2335	0	1588	0	3181	0	6656	0	6700	0
L1MEh	57648	1	4223	0	2605	0	2654	0	1441	0	2181	1	2335	0	1588	0	3181	0	6656	0	6700	0
MER5B	57648	53	4223	4	2605	4	2654	2	1441	1	2181	3	2335	3	1588	0	3181	3	6656	6	6700	4
(GAAAA)n	57648	79	4223	4	2605	2	2654	4	1441	0	2181	3	2335	2	1588	0	3181	3	6656	3	6700	7
RLTR27	57648	5	4223	1	2605	0	2654	2	1441	0	2181	0	2335	0	1588	0	3181	1	6656	2	6700	0
RLTR28	57648	36	4223	2	2605	0	2654	2	1441	1	2181	4	2335	0	1588	1	3181	0	6656	1	6700	3
(CAAAT)n	57648	0	4223	0	2605	0	2654	0	1441	0	2181	0	2335	0	1588	0	3181	0	6656	1	6700	0
Lx2B	57648	43	4223	0	2605	3	2654	2	1441	0	2181	0	2335	0	1588	1	3181	1	6656	16	6700	1
RMER15-int	57648	30	4223	0	2605	0	2654	0	1441	1	2181	2	2335	1	1588	0	3181	0	6656	6	6700	2
ORR1C1-int	57648	3	4223	0	2605	0	2654	0	1441	0	2181	1	2335	0	1588	0	3181	0	6656	1	6700	0
LTR55	57648	6	4223	0	2605	0	2654	3	1441	0	2181	0	2335	0	1588	1	3181	1	6656	2	6700	0
L1MCc	57648	8	4223	0	2605	0	2654	1	1441	0	2181	0	2335	0	1588	0	3181	1	6656	3	6700	1
MIRc	57648	242	4223	11	2605	17	2654	14	1441	5	2181	10	2335	12	1588	7	3181	17	6656	24	6700	32
MER97b	57648	0	4223	0	2605	0	2654	0	1441	0	2181	0	2335	0	1588	0	3181	0	6656	1	6700	0
RLTR20A1	57648	2	4223	0	2605	0	2654	0	1441	0	2181	0	2335	0	1588	0	3181	0	6656	1	6700	0
IAPLTR4_I	57648	1	4223	0	2605	0	2654	0	1441	0	2181	0	2335	0	1588	0	3181	0	6656	0	6700	0
RLTR9A3	57648	8	4223	0	2605	0	2654	0	1441	0	2181	2	2335	0	1588	0	3181	0	6656	2	6700	0
FAM	57648	3	4223	0	2605	0	2654	0	1441	0	2181	0	2335	0	1588	0	3181	0	6656	0	6700	0
RLTR15	57648	20	4223	2	2605	2	2654	1	1441	0	2181	1	2335	1	1588	0	3181	0	6656	1	6700	1
RLTR16C_MM	57648	1	4223	0	2605	0	2654	0	1441	0	2181	0	2335	0	1588	0	3181	0	6656	0	6700	0
MurERV4_19-int	57648	15	4223	1	2605	0	2654	0	1441	0	2181	0	2335	0	1588	0	3181	0	6656	2	6700	1
ERVB7_2-LTR_MM	57648	4	4223	0	2605	0	2654	0	1441	0	2181	0	2335	0	1588	0	3181	0	6656	0	6700	1
L1_Rod	57648	70	4223	3	2605	4	2654	2	1441	0	2181	3	2335	0	1588	2	3181	3	6656	19	6700	4
L1MC1	57648	56	4223	10	2605	3	2654	2	1441	1	2181	3	2335	1	1588	0	3181	4	6656	8	6700	3
Charlie4a	57648	14	4223	2	2605	1	2654	0	1441	0	2181	0	2335	0	1588	1	3181	1	6656	4	6700	1
(TAG)n	57648	4	4223	2	2605	0	2654	2	1441	1	2181	1	2335	1	1588	0	3181	1	6656	0	6700	1
RMER17B2	57648	11	4223	0	2605	0	2654	0	1441	0	2181	0	2335	1	1588	0	3181	0	6656	1	6700	0
RLTR20B1	57648	8	4223	0	2605	0	2654	0	1441	0	2181	1	2335	0	1588	0	3181	0	6656	1	6700	0
URR1A	57648	206	4223	11	2605	3	2654	10	1441	7	2181	10	2335	5	1588	6	3181	4	6656	27	6700	20
(CAAG)n	57648	16	4223	1	2605	2	2654	1	1441	1	2181	0	2335	0	1588	0	3181	0	6656	0	6700	2
RMER12C	57648	27	4223	2	2605	0	2654	1	1441	1	2181	1	2335	0	1588	1	3181	1	6656	2	6700	2
ERVB4_2-LTR_MM	57648	1	4223	0	2605	0	2654	0	1441	0	2181	0	2335	0	1588	0	3181	0	6656	1	6700	0
LTR75	57648	2	4223	0	2605	1	2654	0	1441	0	2181	0	2335	0	1588	0	3181	0	6656	1	6700	0
(TATAG)n	57648	2	4223	0	2605	0	2654	0	1441	0	2181	0	2335	0	1588	0	3181	0	6656	0	6700	0
RMER12	57648	33	4223	1	2605	0	2654	2	1441	0	2181	0	2335	2	1588	0	3181	1	6656	6	6700	2
RLTR41B	57648	2	4223	0	2605	0	2654	0	1441	0	2181	0	2335	0	1588	0	3181	0	6656	0	6700	0
RLTR13D3	57648	23	4223	0	2605	1	2654	1	1441	0	2181	2	2335	0	1588	0	3181	1	6656	5	6700	0
Charlie4z	57648	5	4223	0	2605	0	2654	0	1441	0	2181	0	2335	1	1588	1	3181	1	6656	0	6700	1
RLTR21	57648	18	4223	1	2605	1	2654	2	1441	0	2181	0	2335	0	1588	1	3181	0	6656	3	6700	1
(CTAG)n	57648	1	4223	0	2605	0	2654	0	1441	0	2181	0	2335	0	1588	0	3181	0	6656	0	6700	0
(TTATA)n	57648	13	4223	2	2605	0	2654	1	1441	0	2181	0	2335	0	1588	1	3181	0	6656	0	6700	1
LTR48B	57648	2	4223	0	2605	0	2654	0	1441	0	2181	0	2335	0	1588	0	3181	0	6656	0	6700	0
L1Md_F	57648	18	4223	1	2605	1	2654	2	1441	0	2181	1	2335	0	1588	0	3181	0	6656	6	6700	0
(CACAG)n	57648	1	4223	0	2605	1	2654	0	1441	0	2181	0	2335	0	1588	0	3181	0	6656	0	6700	1
RLTR12G	57648	3	4223	0	2605	1	2654	0	1441	0	2181	0	2335	0	1588	0	3181	0	6656	0	6700	0
Lx9	57648	319	4223	8	2605	18	2654	10	1441	3	2181	21	2335	2	1588	5	3181	7	6656	63	6700	11
LTR106_Mam	57648	3	4223	0	2605	0	2654	0	1441	0	2181	0	2335	0	1588	0	3181	1	6656	1	6700	0
(CAGTA)n	57648	1	4223	0	2605	0	2654	0	1441	0	2181	0	2335	0	1588	0	3181	0	6656	0	6700	0
Lx3_Mus	57648	65	4223	1	2605	2	2654	3	1441	0	2181	5	2335	0	1588	0	3181	2	6656	25	6700	0
LTR16A2	57648	2	4223	2	2605	0	2654	0	1441	0	2181	0	2335	0	1588	0	3181	0	6656	2	6700	0
(CAGTG)n	57648	2	4223	1	2605	0	2654	0	1441	0	2181	0	2335	0	1588	0	3181	0	6656	0	6700	1
RLTR31A_Mm	57648	3	4223	0	2605	0	2654	0	1441	0	2181	0	2335	0	1588	0	3181	0	6656	0	6700	0
RMER17A	57648	18	4223	0	2605	0	2654	0	1441	1	2181	0	2335	1	1588	0	3181	1	6656	4	6700	0
MT2A	57648	107	4223	8	2605	3	2654	4	1441	1	2181	6	2335	2	1588	1	3181	6	6656	20	6700	7
MER90	57648	4	4223	0	2605	0	2654	0	1441	0	2181	0	2335	1	1588	0	3181	0	6656	1	6700	2
B2_Mm1t	57648	4686	4223	93	2605	15	2654	19	1441	40	2181	53	2335	47	1588	15	3181	22	6656	208	6700	463
Kanga11a	57648	0	4223	0	2605	0	2654	0	1441	0	2181	0	2335	0	1588	0	3181	0	6656	1	6700	0
MMERGLN-int	57648	26	4223	5	2605	0	2654	4	1441	0	2181	1	2335	0	1588	1	3181	0	6656	6	6700	1
RLTR13D4	57648	1	4223	0	2605	0	2654	0	1441	0	2181	1	2335	0	1588	0	3181	0	6656	1	6700	0
Tigger2b	57648	1	4223	0	2605	0	2654	0	1441	0	2181	0	2335	0	1588	0	3181	0	6656	0	6700	0
Lx3A	57648	97	4223	0	2605	7	2654	4	1441	0	2181	4	2335	0	1588	2	3181	3	6656	24	6700	0
MTD	57648	514	4223	36	2605	7	2654	31	1441	7	2181	27	2335	12	1588	10	3181	11	6656	72	6700	34
MamRep4096	57648	4	4223	0	2605	0	2654	0	1441	0	2181	0	2335	0	1588	0	3181	0	6656	0	6700	0
ORR1A4	57648	73	4223	4	2605	3	2654	0	1441	2	2181	3	2335	1	1588	0	3181	3	6656	11	6700	4
MER127	57648	1	4223	0	2605	0	2654	0	1441	0	2181	0	2335	0	1588	0	3181	0	6656	0	6700	0
(CAATA)n	57648	0	4223	1	2605	0	2654	1	1441	0	2181	0	2335	0	1588	0	3181	1	6656	0	6700	0
(TCTA)n	57648	93	4223	3	2605	5	2654	3	1441	1	2181	7	2335	1	1588	0	3181	1	6656	10	6700	8
Lx6	57648	121	4223	0	2605	5	2654	4	1441	0	2181	6	2335	0	1588	1	3181	4	6656	39	6700	4
Eulor8	57648	1	4223	0	2605	0	2654	0	1441	0	2181	0	2335	0	1588	0	3181	1	6656	0	6700	0
Tigger17c	57648	9	4223	3	2605	0	2654	0	1441	1	2181	0	2335	0	1588	0	3181	1	6656	1	6700	0
IAP-d-int	57648	17	4223	1	2605	0	2654	0	1441	0	2181	1	2335	0	1588	0	3181	1	6656	7	6700	0
(CGAA)n	57648	1	4223	0	2605	0	2654	0	1441	0	2181	0	2335	0	1588	0	3181	0	6656	1	6700	0
ORR1G	57648	67	4223	2	2605	2	2654	2	1441	0	2181	3	2335	1	1588	4	3181	1	6656	11	6700	2
MLT1O	57648	6	4223	0	2605	0	2654	0	1441	0	2181	1	2335	0	1588	0	3181	0	6656	2	6700	0
Lx5c	57648	174	4223	3	2605	21	2654	12	1441	9	2181	12	2335	4	1588	2	3181	9	6656	67	6700	3
RMER13A1	57648	8	4223	0	2605	4	2654	0	1441	1	2181	3	2335	1	1588	0	3181	0	6656	2	6700	0
RLTR1A2_MM	57648	8	4223	0	2605	0	2654	0	1441	0	2181	3	2335	0	1588	0	3181	0	6656	0	6700	0
RLTR45	57648	5	4223	0	2605	0	2654	1	1441	0	2181	1	2335	0	1588	0	3181	0	6656	4	6700	0
L4_A_Mam	57648	5	4223	0	2605	0	2654	0	1441	0	2181	0	2335	0	1588	0	3181	0	6656	1	6700	1
MLTR25C	57648	0	4223	0	2605	0	2654	0	1441	0	2181	0	2335	0	1588	0	3181	0	6656	1	6700	0
MER31-int	57648	0	4223	0	2605	0	2654	1	1441	0	2181	0	2335	0	1588	0	3181	0	6656	0	6700	0
Charlie24	57648	2	4223	0	2605	0	2654	1	1441	0	2181	0	2335	1	1588	0	3181	0	6656	0	6700	0
LTR37A	57648	3	4223	1	2605	0	2654	2	1441	0	2181	0	2335	0	1588	0	3181	0	6656	1	6700	1
RLTR42	57648	4	4223	0	2605	0	2654	0	1441	0	2181	0	2335	0	1588	0	3181	0	6656	0	6700	0
ERVL-int	57648	6	4223	0	2605	0	2654	0	1441	0	2181	0	2335	0	1588	0	3181	0	6656	2	6700	0
MTA_Mm-int	57648	57	4223	0	2605	0	2654	0	1441	0	2181	2	2335	0	1588	0	3181	1	6656	12	6700	1
Charlie25	57648	3	4223	0	2605	0	2654	0	1441	0	2181	0	2335	1	1588	0	3181	0	6656	0	6700	1
MER113A	57648	0	4223	0	2605	0	2654	1	1441	1	2181	0	2335	0	1588	0	3181	0	6656	0	6700	0
(GGGGA)n	57648	19	4223	0	2605	1	2654	0	1441	0	2181	2	2335	2	1588	0	3181	0	6656	1	6700	1
(CTGGGG)n	57648	9	4223	0	2605	0	2654	0	1441	0	2181	0	2335	1	1588	1	3181	2	6656	1	6700	2
MLT1H1-int	57648	1	4223	0	2605	0	2654	0	1441	0	2181	0	2335	0	1588	0	3181	0	6656	0	6700	0
(CAT)n	57648	22	4223	2	2605	1	2654	1	1441	1	2181	1	2335	0	1588	0	3181	1	6656	3	6700	0
(GGGAA)n	57648	6	4223	0	2605	0	2654	0	1441	0	2181	0	2335	0	1588	0	3181	0	6656	4	6700	0
L1MC4a	57648	47	4223	2	2605	1	2654	2	1441	1	2181	2	2335	0	1588	1	3181	1	6656	3	6700	3
LTR90B	57648	1	4223	0	2605	0	2654	0	1441	0	2181	0	2335	0	1588	0	3181	0	6656	0	6700	0
L1_Mur3	57648	196	4223	4	2605	8	2654	11	1441	2	2181	8	2335	2	1588	1	3181	4	6656	44	6700	8
MER31A	57648	9	4223	0	2605	1	2654	1	1441	0	2181	0	2335	0	1588	1	3181	0	6656	1	6700	1
(TTCTG)n	57648	0	4223	0	2605	0	2654	0	1441	1	2181	0	2335	0	1588	0	3181	0	6656	0	6700	1
MuLV-int	57648	4	4223	0	2605	1	2654	0	1441	0	2181	0	2335	0	1588	0	3181	3	6656	4	6700	0
RLTR1F_Mm	57648	0	4223	0	2605	0	2654	0	1441	0	2181	0	2335	0	1588	0	3181	0	6656	1	6700	0
MER34B-int	57648	1	4223	0	2605	0	2654	0	1441	0	2181	0	2335	0	1588	0	3181	0	6656	0	6700	0
IAPEY3-int	57648	50	4223	1	2605	0	2654	4	1441	0	2181	3	2335	0	1588	0	3181	2	6656	27	6700	0
LTR84a	57648	3	4223	0	2605	0	2654	0	1441	0	2181	0	2335	0	1588	0	3181	0	6656	0	6700	0
Kanga1	57648	5	4223	1	2605	0	2654	1	1441	0	2181	0	2335	0	1588	0	3181	0	6656	0	6700	1
(CCG)n	57648	68	4223	1	2605	10	2654	4	1441	4	2181	0	2335	19	1588	0	3181	102	6656	0	6700	31
MLT1F	57648	27	4223	3	2605	0	2654	0	1441	0	2181	1	2335	1	1588	0	3181	0	6656	3	6700	2
MLTR12	57648	9	4223	0	2605	0	2654	1	1441	0	2181	0	2335	0	1588	0	3181	0	6656	0	6700	2
(CAGC)n	57648	8	4223	0	2605	0	2654	0	1441	0	2181	0	2335	0	1588	1	3181	0	6656	0	6700	1
MER57D	57648	2	4223	0	2605	1	2654	0	1441	0	2181	0	2335	0	1588	0	3181	0	6656	1	6700	0
(CG)n	57648	12	4223	3	2605	0	2654	2	1441	0	2181	1	2335	1	1588	1	3181	3	6656	0	6700	2
ERVB7_1-LTR_MM	57648	2	4223	0	2605	0	2654	0	1441	0	2181	0	2335	0	1588	0	3181	0	6656	0	6700	0
L1M3f	57648	6	4223	0	2605	0	2654	0	1441	0	2181	0	2335	0	1588	0	3181	0	6656	1	6700	0
RLTR9B	57648	3	4223	0	2605	0	2654	1	1441	0	2181	0	2335	0	1588	0	3181	0	6656	0	6700	0
RMER21A	57648	8	4223	0	2605	0	2654	0	1441	0	2181	1	2335	0	1588	0	3181	0	6656	2	6700	0
(C)n	57648	31	4223	2	2605	1	2654	1	1441	1	2181	0	2335	1	1588	0	3181	2	6656	0	6700	3
RMER10A	57648	46	4223	3	2605	2	2654	0	1441	1	2181	3	2335	0	1588	0	3181	0	6656	7	6700	5
L1M3	57648	71	4223	6	2605	0	2654	5	1441	0	2181	5	2335	1	1588	0	3181	1	6656	5	6700	3
L1ME3D	57648	3	4223	2	2605	0	2654	0	1441	0	2181	2	2335	1	1588	0	3181	0	6656	1	6700	0
Arthur1C	57648	2	4223	0	2605	0	2654	0	1441	0	2181	0	2335	0	1588	0	3181	0	6656	0	6700	0
MLTR31E_MM	57648	1	4223	0	2605	0	2654	0	1441	0	2181	0	2335	0	1588	0	3181	0	6656	1	6700	0
RMER17A-int	57648	13	4223	0	2605	0	2654	2	1441	0	2181	1	2335	0	1588	0	3181	2	6656	7	6700	0
RLTR3_Mm	57648	0	4223	0	2605	0	2654	0	1441	0	2181	0	2335	0	1588	0	3181	0	6656	0	6700	0
L1MEg2	57648	2	4223	0	2605	0	2654	0	1441	0	2181	0	2335	0	1588	0	3181	0	6656	0	6700	0
IAPEY3C_LTR	57648	0	4223	0	2605	0	2654	0	1441	0	2181	0	2335	0	1588	0	3181	0	6656	1	6700	0
LTR89	57648	1	4223	0	2605	0	2654	0	1441	0	2181	0	2335	0	1588	0	3181	1	6656	1	6700	0
(GGAA)n	57648	108	4223	7	2605	3	2654	3	1441	0	2181	1	2335	3	1588	1	3181	4	6656	12	6700	8
tRNA-Gly-GGY	57648	1	4223	0	2605	0	2654	0	1441	0	2181	0	2335	0	1588	0	3181	0	6656	0	6700	0
RLTR20B3A_MM	57648	4	4223	0	2605	0	2654	0	1441	0	2181	0	2335	0	1588	0	3181	2	6656	0	6700	0
MER63C	57648	2	4223	0	2605	0	2654	0	1441	0	2181	0	2335	0	1588	0	3181	0	6656	0	6700	1
(CATTT)n	57648	0	4223	1	2605	0	2654	0	1441	0	2181	0	2335	0	1588	0	3181	0	6656	0	6700	0
RLTR18B	57648	12	4223	0	2605	0	2654	0	1441	0	2181	1	2335	0	1588	0	3181	2	6656	2	6700	2
MER57E2	57648	1	4223	0	2605	0	2654	0	1441	0	2181	0	2335	0	1588	0	3181	0	6656	0	6700	0
(TTCTC)n	57648	21	4223	1	2605	2	2654	0	1441	0	2181	1	2335	0	1588	1	3181	0	6656	1	6700	1
RLTR20C	57648	0	4223	0	2605	0	2654	0	1441	0	2181	0	2335	0	1588	0	3181	0	6656	0	6700	0
MLT1F1-int	57648	1	4223	1	2605	0	2654	0	1441	0	2181	1	2335	0	1588	0	3181	0	6656	1	6700	0
ERVB2_1A-I_MM-int	57648	1	4223	0	2605	0	2654	0	1441	0	2181	0	2335	0	1588	0	3181	0	6656	0	6700	0
MMSAT4	57648	4	4223	1	2605	1	2654	0	1441	0	2181	0	2335	0	1588	0	3181	1	6656	0	6700	1
(TTGGGG)n	57648	0	4223	0	2605	0	2654	0	1441	0	2181	0	2335	0	1588	0	3181	0	6656	0	6700	0
IAPEY5_LTR	57648	1	4223	0	2605	0	2654	1	1441	0	2181	0	2335	0	1588	0	3181	0	6656	0	6700	0
RLTR20B4_MM	57648	9	4223	0	2605	0	2654	0	1441	0	2181	1	2335	0	1588	1	3181	0	6656	2	6700	0
MamGypLTR1b	57648	0	4223	0	2605	0	2654	0	1441	0	2181	0	2335	1	1588	0	3181	0	6656	0	6700	0
RMER13A	57648	13	4223	0	2605	1	2654	1	1441	0	2181	1	2335	0	1588	1	3181	3	6656	1	6700	0
(TTG)n	57648	82	4223	8	2605	4	2654	5	1441	2	2181	2	2335	4	1588	5	3181	3	6656	5	6700	13
MTE2b-int	57648	12	4223	0	2605	0	2654	0	1441	0	2181	1	2335	0	1588	0	3181	0	6656	1	6700	0
MURVY-LTR	57648	10	4223	1	2605	0	2654	0	1441	0	2181	0	2335	0	1588	0	3181	1	6656	1	6700	1
ORR1B2	57648	106	4223	5	2605	2	2654	1	1441	1	2181	6	2335	0	1588	0	3181	2	6656	23	6700	8
RLTR10-int	57648	11	4223	0	2605	0	2654	0	1441	0	2181	0	2335	0	1588	0	3181	0	6656	0	6700	0
LTR103_Mam	57648	0	4223	0	2605	0	2654	0	1441	0	2181	0	2335	1	1588	0	3181	0	6656	0	6700	0
PB1D10	57648	855	4223	99	2605	19	2654	22	1441	21	2181	25	2335	29	1588	18	3181	21	6656	47	6700	143
MER45R	57648	6	4223	0	2605	0	2654	0	1441	0	2181	0	2335	0	1588	0	3181	0	6656	0	6700	2
RLTR46B	57648	11	4223	1	2605	1	2654	2	1441	0	2181	2	2335	0	1588	0	3181	0	6656	5	6700	0
(TTCCC)n	57648	5	4223	0	2605	0	2654	0	1441	0	2181	2	2335	0	1588	0	3181	0	6656	2	6700	0
