# Supplementary material for: H3K27 and H3K9 methylation mask potential CTCF binding sites to maintain 3D genome integrity
Source: HighWire-hosted journal article supplement (doi:10.1101/gr.280732.125), 2025-08-05
Supplement: Supplemental_Table_S3.xlsx [file Supplemental_Table_S3.xlsx]

## Sheet: Sheet1
Supplemental Table S3: Raw data for Fig. 3B
This table presents the raw data for Fig. 3B. It shows the number of differentially expressed (DE) genes located within 100 kb of CTCF DE peaks, categorized by DE peak class and sample.
Class	CTCF_change	Sample	RNA_change	Total number of genes analyzed	Genes overlapping with DE peaks	Total number of differentially expressed genes	DE genes overlapping with DE binding peaks
Class1	DOWN	Setdb1KO	UP	24453	4650	972	119
Class1	DOWN	WT+DS	UP	24453	4650	902	231
Class1	DOWN	5KO	UP	24453	4650	1909	336
Class1	DOWN	TKO	DOWN	24453	4650	1193	379
Class1	DOWN	5KO	DOWN	24453	4650	1476	411
Class1	DOWN	WT+DS	DOWN	24453	4650	131	24
Class1	DOWN	TKO	UP	24453	4650	1358	201
Class1	DOWN	5KO+DS	DOWN	24453	4650	1273	281
Class1	DOWN	Setdb1KO	DOWN	24453	4650	1055	363
Class1	DOWN	5KO+DS	UP	24453	4650	3225	731
Class2	DOWN	Setdb1KO	UP	24453	4960	972	181
Class2	DOWN	WT+DS	UP	24453	4960	902	165
Class2	DOWN	5KO	UP	24453	4960	1909	373
Class2	DOWN	TKO	DOWN	24453	4960	1193	354
Class2	DOWN	5KO	DOWN	24453	4960	1476	379
Class2	DOWN	WT+DS	DOWN	24453	4960	131	32
Class2	DOWN	TKO	UP	24453	4960	1358	241
Class2	DOWN	5KO+DS	DOWN	24453	4960	1273	392
Class2	DOWN	Setdb1KO	DOWN	24453	4960	1055	283
Class2	DOWN	5KO+DS	UP	24453	4960	3225	506
Class3	DOWN	Setdb1KO	UP	24453	7696	972	341
Class3	DOWN	WT+DS	UP	24453	7696	902	272
Class3	DOWN	5KO	UP	24453	7696	1909	416
Class3	DOWN	TKO	DOWN	24453	7696	1193	448
Class3	DOWN	5KO	DOWN	24453	7696	1476	625
Class3	DOWN	WT+DS	DOWN	24453	7696	131	45
Class3	DOWN	TKO	UP	24453	7696	1358	397
Class3	DOWN	5KO+DS	DOWN	24453	7696	1273	564
Class3	DOWN	Setdb1KO	DOWN	24453	7696	1055	369
Class3	DOWN	5KO+DS	UP	24453	7696	3225	687
Class4	DOWN	Setdb1KO	UP	24453	8501	972	355
Class4	DOWN	WT+DS	UP	24453	8501	902	297
Class4	DOWN	5KO	UP	24453	8501	1909	591
Class4	DOWN	TKO	DOWN	24453	8501	1193	425
Class4	DOWN	5KO	DOWN	24453	8501	1476	503
Class4	DOWN	WT+DS	DOWN	24453	8501	131	32
Class4	DOWN	TKO	UP	24453	8501	1358	447
Class4	DOWN	5KO+DS	DOWN	24453	8501	1273	423
Class4	DOWN	Setdb1KO	DOWN	24453	8501	1055	337
Class4	DOWN	5KO+DS	UP	24453	8501	3225	1029
Class5	DOWN	Setdb1KO	UP	24453	12938	972	567
Class5	DOWN	WT+DS	UP	24453	12938	902	448
Class5	DOWN	5KO	UP	24453	12938	1909	806
Class5	DOWN	TKO	DOWN	24453	12938	1193	701
Class5	DOWN	5KO	DOWN	24453	12938	1476	895
Class5	DOWN	WT+DS	DOWN	24453	12938	131	69
Class5	DOWN	TKO	UP	24453	12938	1358	684
Class5	DOWN	5KO+DS	DOWN	24453	12938	1273	883
Class5	DOWN	Setdb1KO	DOWN	24453	12938	1055	573
Class5	DOWN	5KO+DS	UP	24453	12938	3225	1162
Consensus	NA	Setdb1KO	UP	24453	23321	972	936
Consensus	NA	WT+DS	UP	24453	23321	902	880
Consensus	NA	5KO	UP	24453	23321	1909	1801
Consensus	NA	TKO	DOWN	24453	23321	1193	1162
Consensus	NA	5KO	DOWN	24453	23321	1476	1444
Consensus	NA	WT+DS	DOWN	24453	23321	131	123
Consensus	NA	TKO	UP	24453	23321	1358	1303
Consensus	NA	5KO+DS	DOWN	24453	23321	1273	1253
Consensus	NA	Setdb1KO	DOWN	24453	23321	1055	1021
Consensus	NA	5KO+DS	UP	24453	23321	3225	3033
Class1	UP	Setdb1KO	UP	24453	9520	972	460
Class1	UP	WT+DS	UP	24453	9520	902	351
Class1	UP	5KO	UP	24453	9520	1909	699
Class1	UP	TKO	DOWN	24453	9520	1193	495
Class1	UP	5KO	DOWN	24453	9520	1476	630
Class1	UP	WT+DS	DOWN	24453	9520	131	55
Class1	UP	TKO	UP	24453	9520	1358	569
Class1	UP	5KO+DS	DOWN	24453	9520	1273	607
Class1	UP	Setdb1KO	DOWN	24453	9520	1055	399
Class1	UP	5KO+DS	UP	24453	9520	3225	1009
Class2	UP	Setdb1KO	UP	24453	3438	972	131
Class2	UP	WT+DS	UP	24453	3438	902	156
Class2	UP	5KO	UP	24453	3438	1909	245
Class2	UP	TKO	DOWN	24453	3438	1193	167
Class2	UP	5KO	DOWN	24453	3438	1476	205
Class2	UP	WT+DS	DOWN	24453	3438	131	9
Class2	UP	TKO	UP	24453	3438	1358	199
Class2	UP	5KO+DS	DOWN	24453	3438	1273	148
Class2	UP	Setdb1KO	DOWN	24453	3438	1055	142
Class2	UP	5KO+DS	UP	24453	3438	3225	592
Class3	UP	Setdb1KO	UP	24453	3944	972	210
Class3	UP	WT+DS	UP	24453	3944	902	197
Class3	UP	5KO	UP	24453	3944	1909	582
Class3	UP	TKO	DOWN	24453	3944	1193	175
Class3	UP	5KO	DOWN	24453	3944	1476	194
Class3	UP	WT+DS	DOWN	24453	3944	131	28
Class3	UP	TKO	UP	24453	3944	1358	332
Class3	UP	5KO+DS	DOWN	24453	3944	1273	151
Class3	UP	Setdb1KO	DOWN	24453	3944	1055	183
Class3	UP	5KO+DS	UP	24453	3944	3225	853
Class4	UP	Setdb1KO	UP	24453	5269	972	260
Class4	UP	WT+DS	UP	24453	5269	902	295
Class4	UP	5KO	UP	24453	5269	1909	483
Class4	UP	TKO	DOWN	24453	5269	1193	322
Class4	UP	5KO	DOWN	24453	5269	1476	399
Class4	UP	WT+DS	DOWN	24453	5269	131	30
Class4	UP	TKO	UP	24453	5269	1358	363
Class4	UP	5KO+DS	DOWN	24453	5269	1273	330
Class4	UP	Setdb1KO	DOWN	24453	5269	1055	297
Class4	UP	5KO+DS	UP	24453	5269	3225	729
Class5	UP	Setdb1KO	UP	24453	7176	972	250
Class5	UP	WT+DS	UP	24453	7176	902	350
Class5	UP	5KO	UP	24453	7176	1909	697
Class5	UP	TKO	DOWN	24453	7176	1193	330
Class5	UP	5KO	DOWN	24453	7176	1476	385
Class5	UP	WT+DS	DOWN	24453	7176	131	33
Class5	UP	TKO	UP	24453	7176	1358	426
Class5	UP	5KO+DS	DOWN	24453	7176	1273	222
Class5	UP	Setdb1KO	DOWN	24453	7176	1055	318
Class5	UP	5KO+DS	UP	24453	7176	3225	1391
