# Supplementary material for: H3K27 and H3K9 methylation mask potential CTCF binding sites to maintain 3D genome integrity
Source: HighWire-hosted journal article supplement (doi:10.1101/gr.280732.125), 2025-08-05
Supplement: Supplemental_Table_S4.xlsx [file Supplemental_Table_S4.xlsx]

## Sheet: Sheet1
Supplemental Table S4
Accession numbers of the NGS data used in this study.
Sample name	Sample type	Study	Accession no
WT iMEF rep1	CTCF ChIP-seq	This study	GSE293581
WT iMEF rep2	CTCF ChIP-seq	This study	GSE293581
WT+DS iMEF rep1	CTCF ChIP-seq	This study	GSE293581
WT+DS iMEF rep2	CTCF ChIP-seq	This study	GSE293581
Setdb1 KO iMEF rep1	CTCF ChIP-seq	This study	GSE293581
Setdb1 KO iMEF rep2	CTCF ChIP-seq	This study	GSE293581
Setdb1 KO+DS iMEF rep1	CTCF ChIP-seq	This study	GSE293581
Setdb1 KO+DS iMEF rep2	CTCF ChIP-seq	This study	GSE293581
TKO iMEF rep1	CTCF ChIP-seq	This study	GSE293581
TKO iMEF rep2	CTCF ChIP-seq	This study	GSE293581
TKO+DS iMEF rep1	CTCF ChIP-seq	This study	GSE293581
TKO+DS iMEF rep2	CTCF ChIP-seq	This study	GSE293581
5KO clone55 iMEF rep1	CTCF ChIP-seq	This study	GSE293581
5KO clone55 iMEF rep2	CTCF ChIP-seq	This study	GSE293581
5KO clone55+DS iMEF rep1	CTCF ChIP-seq	This study	GSE293581
5KO clone55+DS iMEF rep2	CTCF ChIP-seq	This study	GSE293581
5KO clone14 iMEF rep1	CTCF ChIP-seq	This study	GSE293581
5KO clone14 iMEF rep2	CTCF ChIP-seq	This study	GSE293581
5KO clone14+DS iMEF rep1	CTCF ChIP-seq	This study	GSE293581
5KO clone14+DS iMEF rep2	CTCF ChIP-seq	This study	GSE293581
WT iMEF	H3K9me3 ChIP-seq	Fukuda et al., NAR, 2023	GSE200011
WT iMEF	H3K9me2 ChIP-seq	Fukuda et al., NAR, 2023	GSE200011
WT iMEF	H3K27me3 ChIP-seq	Fukuda et al., NAR, 2023	GSE200011
5KO clone55 iMEF	H3K27me3 ChIP-seq	Fukuda et al., NAR, 2023	GSE200011
WT iMEF	input	Fukuda et al., NAR, 2023	GSE200011
5KO clone55 iMEF	input	Fukuda et al., NAR, 2023	GSE200011
WT iMEF rep1	WGBS	Fukuda et al., NAR, 2023	GSE200010
5KO clone55 iMEF rep1	WGBS	Fukuda et al., NAR, 2023	GSE200010
WT iMEF rep2	WGBS	Fukuda et al., NAR, 2023	GSE200010
5KO clone55 iMEF rep2	WGBS	Fukuda et al., NAR, 2023	GSE200010
Setdb1 KO iMEF	H3K9me3 ChIP-seq	This study	GSE297986
TKO iMEF	H3K27me3 ChIP-seq	This study	GSE297986
TKO iMEF	H3K9me3 ChIP-seq	This study	GSE297986
TKO iMEF	H3K9me2 ChIP-seq	This study	GSE297986
5KO clone55 iMEF	H3K9me2 ChIP-seq	This study	GSE297986
Setdb1 KO iMEF	H3K9me2 ChIP-seq	This study	GSE297986
Setdb1 KO iMEF	input	This study	GSE297986
TKO iMEF	input	This study	GSE297986
WT iMEF rep1	RNA-seq	Fukuda et al., NAR, 2023	GSM6612273
WT iMEF rep2	RNA-seq	Fukuda et al., NAR, 2023	GSM6612274
WT+DS iMEF rep1	RNA-seq	Fukuda et al., NAR, 2023	GSM6612275
WT+DS iMEF rep2	RNA-seq	Fukuda et al., NAR, 2023	GSM6612276
5KO clone55 iMEF rep1	RNA-seq	Fukuda et al., NAR, 2023	GSM6612277
5KO clone55 iMEF rep2	RNA-seq	Fukuda et al., NAR, 2023	GSM6612278
5KO clone55+DS iMEF rep1	RNA-seq	Fukuda et al., NAR, 2023	GSM6612279
5KO clone55+DS iMEF rep2	RNA-seq	Fukuda et al., NAR, 2023	GSM6612280
WT iMEF rep1	Hi-C	Fukuda et al., NAR, 2023	GSM6612265
WT iMEF rep2	Hi-C	Fukuda et al., NAR, 2023	GSM6612266
5KO clone55 iMEF rep1	Hi-C	Fukuda et al., NAR, 2023	GSM6612269
5KO clone55 iMEF rep2	Hi-C	Fukuda et al., NAR, 2023	GSM6612270
5KO clone55+DS iMEF rep1	Hi-C	Fukuda et al., NAR, 2023	GSM6612271
5KO clone55+DS iMEF rep2	Hi-C	Fukuda et al., NAR, 2023	GSM6612272
MII Oocyte	CTCF ChIP-seq	Wang et al., Genes. Dev., 2024	CRR817630, CRR817631
Zygote	CTCF ChIP-seq	Wang et al., Genes. Dev., 2024	CRR817635, CRR817636
2 cell	CTCF ChIP-seq	Wang et al., Genes. Dev., 2024	CRR817639
8 cell	CTCF ChIP-seq	Wang et al., Genes. Dev., 2024	CRR817646
ICM	CTCF ChIP-seq	Wang et al., Genes. Dev., 2024	CRR817653
MII Oocyte	H3K9me3 ChIP-seq	Wang et al., NCB, 2018	SRX2763422
Zygote	H3K9me3 ChIP-seq	Wang et al., NCB, 2018	SRX2763433
2 cell	H3K9me3 ChIP-seq	Wang et al., NCB, 2018	SRX2763435
8 cell	H3K9me3 ChIP-seq	Wang et al., NCB, 2018	SRX2763439
ICM	H3K9me3 ChIP-seq	Wang et al., NCB, 2018	SRX2763443
MII Oocyte	H3K27me3 ChIP-seq	Liu et al., Nature, 2016	GSM2082666
Zygote	H3K27me3 ChIP-seq	Liu et al., Nature, 2016	GSM2588568
2 cell	H3K27me3 ChIP-seq	Liu et al., Nature, 2016	GSM2082674
8 cell	H3K27me3 ChIP-seq	Liu et al., Nature, 2016	GSM2082686
ICM	H3K27me3 ChIP-seq	Liu et al., Nature, 2016	GSM2082698
8 cell	Hi-C	Du et al., Nature, 2017	GSM2203837
ICM	Hi-C	Du et al., Nature, 2017	GSM2203839
